# Supplementary material
Source: Research Square preprint supplement (doi:10.21203/rs.3.rs-9428731/v1)
Supplement: Supplementary file 1 [file 0455db6fdc107641b1a6da5e.xlsx]

## Sheet: S1
Supplementary Table 1. Complete matrix of handcrafted and deep learning–derived histopathological features extracted from whole-slide images.
	Total_Granularity_10_Eosin	Total_Granularity_10_Hematoxylin	Total_Granularity_10_OrigGray	Total_Granularity_11_Eosin	Total_Granularity_11_Hematoxylin	Total_Granularity_11_OrigGray	Total_Granularity_12_Eosin	Total_Granularity_12_Hematoxylin	Total_Granularity_12_OrigGray	Total_Granularity_13_Eosin	Total_Granularity_13_Hematoxylin	Total_Granularity_13_OrigGray	Total_Granularity_14_Eosin	Total_Granularity_14_Hematoxylin	Total_Granularity_14_OrigGray	Total_Granularity_15_Eosin	Total_Granularity_15_Hematoxylin	Total_Granularity_15_OrigGray	Total_Granularity_16_Eosin	Total_Granularity_16_Hematoxylin	Total_Granularity_16_OrigGray	Total_Granularity_1_Eosin	Total_Granularity_1_Hematoxylin	Total_Granularity_1_OrigGray	Total_Granularity_2_Eosin	Total_Granularity_2_Hematoxylin	Total_Granularity_2_OrigGray	Total_Granularity_3_Eosin	Total_Granularity_3_Hematoxylin	Total_Granularity_3_OrigGray	Total_Granularity_4_Eosin	Total_Granularity_4_Hematoxylin	Total_Granularity_4_OrigGray	Total_Granularity_5_Eosin	Total_Granularity_5_Hematoxylin	Total_Granularity_5_OrigGray	Total_Granularity_6_Eosin	Total_Granularity_6_Hematoxylin	Total_Granularity_6_OrigGray	Total_Granularity_7_Eosin	Total_Granularity_7_Hematoxylin	Total_Granularity_7_OrigGray	Total_Granularity_8_Eosin	Total_Granularity_8_Hematoxylin	Total_Granularity_8_OrigGray	Total_Granularity_9_Eosin	Total_Granularity_9_Hematoxylin	Total_Granularity_9_OrigGray	Total_Intensity_LowerQuartileIntensity_Eosin
TCGA-2E-A9G8	1.39773	2.9137	2.79468	3.57941	5.18079	1.82587	8.18209	7.29847	3.6312	3.0155	2.5111	4.3378	1.54398	1.38853	6.30248	6.16608	3.51661	1.16154	5.03266	1.08983	3.73555	10.0285	12.1824	14.9473	4.91333	6.94557	7.07097	2.57829	3.63535	3.3914	3.86313	5.08262	3.73993	4.26692	4.27318	5.43559	6.50541	5.58307	4.40541	7.03472	5.58804	5.00352	3.15917	4.39407	4.58993	5.79126	3.18211	3.66332	0.306294
TCGA-4E-A92E	0.98608	3.80239	1.8083	1.07333	2.73264	1.62755	1.30761	3.71678	1.44499	1.62595	4.0128	1.49387	1.45755	3.04103	1.47916	1.18638	3.56909	2.15478	1.40641	3.65052	2.32228	1.36218	2.54453	1.33549	1.5951	4.74763	1.86916	1.34664	5.69345	1.85486	1.04542	5.38661	1.63242	0.95138	4.55811	1.69801	0.831757	3.9695	1.5431	0.813164	3.8783	1.25653	1.06846	3.65708	1.45206	0.932574	4.30709	1.68447	0.480943
TCGA-5B-A90C	5.33434	7.44342	2.94852	6.43459	4.14419	1.75557	5.06766	4.68641	2.21997	2.2386	1.47244	0.718364	3.02102	5.18074	1.31853	1.45862	4.09593	0	3.71117	2.27512	0.436915	10.5509	11.4025	11.4411	4.81068	6.18406	4.28771	2.57283	4.30396	2.91129	3.49303	3.70783	3.49606	4.93122	4.40948	2.77268	7.81321	2.78868	3.16479	7.08098	4.22826	2.67183	7.64395	5.42667	1.7608	6.20828	6.68997	7.1288	0.202436
TCGA-5S-A9Q8	3.76929	4.95031	3.34908	6.69204	3.32721	0.97962	2.62753	5.60641	3.16924	4.8701	3.44345	3.71677	4.761	2.14395	0.906647	1.51993	2.87067	2.95069	3.08964	4.27905	4.48275	10.7837	8.3393	12.9136	5.10168	5.17529	6.66746	2.56697	3.0097	5.46598	1.97267	3.60235	3.55932	3.22308	5.26452	3.46082	2.66944	4.9023	5.77801	7.28372	6.13834	3.97559	4.53492	6.9613	9.27574	6.58883	7.05301	5.86382	0.223708
TCGA-A5-A0G1	3.31692	5.33861	2.31971	7.37219	2.50859	1.95082	1.42356	4.85084	3.58456	6.95784	1.61112	3.19016	3.07649	2.57734	1.49747	2.32303	3.28664	2.30164	4.08672	2.42048	2.78497	9.41682	6.67894	16.5545	4.97424	4.37517	7.80953	2.45354	2.18803	4.16585	2.50846	3.47006	4.47973	4.67083	7.02098	4.08762	5.01751	6.31133	6.36689	7.72752	3.2349	2.96967	2.55271	5.51442	3.52736	4.02646	3.28387	1.75871	0.304667
TCGA-A5-A0G2	8.61195	4.32921	2.2541	3.47212	7.25124	1.48745	5.06854	4.20877	3.64855	2.29637	3.04744	4.35512	2.69228	4.5473	1.88731	2.48877	2.99343	2.79551	5.84852	3.83421	1.71761	6.18099	5.35081	19.0089	3.0438	4.59437	10.32	1.8252	2.48082	4.78491	1.49359	1.80272	3.75469	4.35578	3.17578	5.97825	6.20991	2.85176	5.39998	1.80655	6.02909	6.84739	3.66776	7.62071	4.75625	5.84211	3.13488	8.88282	0.523846
TCGA-A5-A0G3	6.39348	4.87719	2.09846	3.45218	4.03845	2.38911	7.08786	3.34525	4.02021	3.2677	2.77441	2.89357	3.08641	8.36211	2.79492	6.46631	1.47334	1.03485	3.96059	3.20325	1.33431	4.97423	4.82771	17.5456	2.61498	4.01268	10.9184	1.31286	2.62214	6.88554	1.71792	1.87295	3.84586	2.24766	5.20135	6.77552	2.90338	4.54024	5.80054	4.82049	5.65529	7.47226	3.15741	3.1761	6.14823	4.72483	6.29699	5.52408	0.495548
TCGA-A5-A0G5	3.80576	2.37696	1.63572	7.02644	2.10981	3.20397	2.86089	1.98736	3.19461	5.28137	3.06724	2.6396	9.15698	2.77524	2.84026	1.54056	6.50623	2.57045	3.8551	4.40684	2.08512	5.27666	3.04699	22.8876	2.15933	1.83612	10.5149	0.931959	0.924282	5.20817	0.654371	0.624813	3.56388	1.84242	0.92036	3.95309	1.83417	1.08542	5.5902	1.96899	0.859854	6.50581	3.46147	2.22658	4.55723	3.5564	1.8239	4.21735	0.596694
TCGA-A5-A0G9	4.81591	4.32168	2.57294	2.45815	5.60676	2.93762	2.21642	6.94161	1.93274	6.08025	3.62038	5.18079	2.34598	4.6628	1.50414	5.09953	4.99277	4.36858	5.28309	2.94152	2.16852	4.81527	4.39453	16.704	2.21587	3.06813	9.26182	1.10496	1.97431	6.41606	1.26974	1.75578	4.92056	1.09055	2.40499	2.30935	2.31811	3.38597	3.17586	2.32505	4.39351	4.92504	1.79197	5.0585	6.06989	3.79818	2.07824	2.12114	0.567057
TCGA-A5-A0GA	4.02895	5.2527	2.77845	7.05654	3.09239	3.21946	5.17971	4.8535	5.8107	5.71477	5.61637	4.18714	6.4016	3.02758	2.35542	3.13123	3.78861	6.10189	0.940211	1.60196	2.06938	7.15866	12.8046	12.2194	3.78616	7.2021	6.48669	2.05807	4.18126	3.98611	1.90089	3.87642	2.41842	4.13839	5.94896	2.39421	3.69465	6.49215	1.01827	4.10635	5.75431	2.48133	5.82605	5.22996	1.73352	5.08724	8.90188	1.18062	0.30769
TCGA-A5-A0GB	8.04687	4.69253	1.82205	4.80075	2.88465	3.82177	3.05468	4.84157	3.32308	2.2661	2.84025	2.06347	2.05668	1.12061	1.65087	3.158	2.4635	1.08489	4.02559	2.56237	1.67991	8.21828	14.711	16.8134	4.88061	7.92757	9.11535	2.85804	4.22654	3.99287	2.96471	4.80202	3.72233	3.82718	4.29391	5.22342	4.43677	9.93589	7.89823	8.52962	7.64085	5.43329	6.49546	6.21001	9.81559	10.5301	5.50227	4.43371	0.367988
TCGA-A5-A0GD	3.12053	4.68485	2.68539	1.87312	4.40173	3.90327	4.09426	4.75814	6.04039	2.95884	4.53298	2.03905	1.17931	2.54025	1.11088	4.5651	1.01036	2.66924	1.11829	2.61271	2.91602	5.0342	3.86237	19.2695	2.28871	2.52992	9.75297	1.39379	1.65547	5.8557	1.16347	1.47902	4.58118	2.14545	1.29789	4.77967	1.48704	1.98411	3.91445	2.9584	4.32049	4.56418	2.98225	4.14355	6.48515	2.17285	3.38018	3.37578	0.573196
TCGA-A5-A0GE	3.30522	3.67866	2.59668	2.70511	3.84649	3.56504	3.72563	5.06336	8.01482	4.10772	2.05142	2.96564	6.75678	5.57812	4.68064	5.54638	4.89022	8.97569	3.97413	2.13971	8.24334	7.34785	9.88384	15.063	3.28857	5.34928	7.19858	1.87609	2.95475	4.18614	1.66063	2.54749	2.89684	3.34031	2.27147	2.80921	3.86541	4.84586	2.00944	7.10344	6.55402	2.1366	5.48416	6.13843	6.33535	4.87645	8.25709	5.88181	0.415067
TCGA-A5-A0GG	1.71025	3.06588	4.37096	5.84448	4.46777	3.50661	3.33802	3.08952	3.52678	3.12738	3.30293	2.98459	3.45876	6.92127	4.43776	2.57421	5.13671	0.41816	1.66284	6.48241	2.54179	7.38585	6.64671	17.1097	3.03423	3.96707	8.65303	1.46129	2.06847	4.11027	0.831595	2.21394	3.71193	1.61419	2.87996	4.64154	1.40714	3.49225	4.65457	2.06101	2.91484	0.885305	3.41591	7.68861	5.86711	2.09588	3.71684	3.78224	0.657184
TCGA-A5-A0GH	2.60725	3.20048	1.61269	4.50103	2.1488	5.85527	5.49027	3.10139	5.70254	4.94007	6.46709	1.64732	6.34923	2.21834	5.0202	3.80696	2.47952	0.886592	5.32458	4.21024	0.579006	5.73803	5.47537	14.9131	2.82039	4.00794	9.03658	1.59755	2.69633	6.4354	1.36516	2.68577	3.487	3.13908	3.84599	4.90777	3.73214	5.12214	3.83283	4.54157	6.82028	5.77118	3.63207	5.20748	7.29446	4.16067	5.2549	3.5332	0.494983
TCGA-A5-A0GI	5.90284	3.78554	7.69447	7.82881	4.91478	5.73094	3.43771	4.59045	2.33589	5.16331	5.34778	3.53867	4.5459	2.71266	2.62478	1.84665	2.00538	4.08874	4.00027	3.9859	1.78323	8.69627	7.00338	13.5882	4.24129	4.42902	6.97956	2.37603	2.99929	5.49657	1.92286	2.99609	3.75036	4.16457	3.83596	2.69563	7.60745	3.59718	3.31618	6.55985	6.23694	1.91624	4.49367	4.40746	5.17042	6.9379	7.0942	4.96146	0.348981
TCGA-A5-A0GJ	3.40195	2.15461	4.50041	2.73185	7.05398	2.9227	1.87538	3.10622	2.38647	4.82997	2.73362	4.71135	5.02013	2.81136	1.41568	2.86855	4.4827	3.00616	3.36686	2.34571	3.23279	7.69643	10.908	13.2644	3.89295	7.54453	6.38459	2.14331	4.27587	4.40036	1.43974	5.11235	2.88499	3.18201	6.29475	4.49407	3.79177	7.78716	3.34844	6.30474	6.80224	3.09271	8.12252	3.28778	8.16809	8.38241	9.42278	5.73237	0.294861
TCGA-A5-A0GM	4.17431	3.18927	3.48034	5.15151	4.86523	6.26479	2.55589	5.71224	7.91566	7.32248	4.54214	2.28012	4.06154	1.42689	2.10566	4.88918	9.01262	1.75202	6.90756	4.03515	0.541378	7.23215	7.35123	12.4353	3.61998	4.87278	6.60551	2.30152	3.22141	4.88809	1.60397	2.21256	3.59289	3.54073	4.36452	3.05739	2.35999	4.30986	2.99269	5.52845	4.78755	3.85704	3.77325	4.8912	1.45334	8.4385	7.72924	3.89073	0.305487
TCGA-A5-A0GN	4.07228	4.91798	2.73598	5.80326	2.77237	3.0978	3.92032	1.21917	2.00287	3.56033	8.6418	3.793	1.55434	3.09961	4.94114	3.68212	5.61436	1.32117	2.66752	3.29298	3.0393	5.74775	5.04181	17.2881	2.57856	3.25181	8.80284	1.41458	2.08875	5.20013	1.141	1.41928	4.21814	1.40377	1.63832	4.45715	2.4316	2.55769	4.19534	3.05779	4.51938	5.94294	2.30259	4.85248	3.3282	3.94825	6.15243	5.35834	0.471131
TCGA-A5-A0GP	1.78739	3.93146	2.41001	2.49101	2.93478	5.28674	3.12959	2.07926	4.47666	7.34692	4.46574	3.89755	2.85984	4.11879	1.46554	3.03252	3.54731	1.23841	2.7453	3.91329	4.7945	6.81267	8.73404	17.5122	3.41352	4.88391	8.81917	1.61545	2.86729	4.26952	1.56103	2.42374	3.22367	1.17073	3.55185	3.58607	1.7544	4.27229	2.91275	2.36219	4.72653	3.66634	2.32624	3.25495	3.73444	1.99149	5.65515	5.18009	0.525719
TCGA-A5-A0GQ	2.50906	5.39753	3.41134	5.99508	4.82711	2.35312	4.49075	5.08093	1.80629	6.09282	2.75711	2.08804	3.44534	3.83412	2.27999	4.56597	3.43163	1.83418	1.54584	2.62502	2.00795	8.23302	6.84175	24.8108	3.66211	4.27979	9.66045	1.80585	2.77904	4.30077	1.60674	4.84457	3.98557	3.13254	7.00798	6.22441	4.49038	5.26968	6.42498	5.14068	6.56453	4.85474	4.65483	5.18694	3.89408	4.84223	6.58055	1.20926	0.413286
TCGA-A5-A0GR	6.85732	5.42978	2.32246	2.40535	5.60839	0.683757	4.33219	1.3854	2.39687	1.37159	2.6572	0.858195	4.56598	3.19813	2.6059	4.9846	4.9302	2.34991	3.72297	0.96684	5.22219	7.72759	12.8528	10.5957	4.29021	7.35783	5.71426	2.31832	4.18156	3.62782	2.06945	2.60114	3.76932	3.08151	5.81915	1.624	4.44212	7.28887	2.32248	4.12735	6.48963	2.00457	6.45248	5.92848	1.5292	3.85183	7.2155	1.75869	0.235937
TCGA-A5-A0GU	3.95687	5.73624	3.27888	4.18822	3.50325	4.55423	3.19118	4.81168	3.18533	7.52434	5.92847	2.86844	5.8818	4.28754	3.18546	1.65033	3.20082	5.08014	4.75204	5.73386	2.70931	6.03679	6.5253	14.4799	3.02489	4.16985	7.44171	1.6697	2.69129	5.4711	1.41784	1.95688	3.70317	2.68439	2.47823	4.04269	3.72072	2.61865	4.24928	4.96303	2.62697	4.25299	4.44952	2.69471	4.97877	7.42904	3.37454	4.5543	0.453764
TCGA-A5-A0GV	10.874	5.64589	7.40161	5.23932	5.79957	5.96878	4.97546	5.19388	5.38469	3.57226	4.17345	3.34029	6.26241	3.70976	2.69121	3.9331	5.63153	2.32234	1.53998	2.61858	4.82766	6.27829	4.86821	19.6482	3.01006	3.22587	9.83442	1.44197	2.00822	5.23337	1.4283	1.79449	3.39839	1.75433	2.13075	3.13248	3.03088	4.28159	1.54365	2.73689	3.89108	1.89452	4.10592	5.11033	1.95525	3.88958	9.35216	5.79075	0.480347
TCGA-A5-A0GW	7.93946	6.56429	2.51192	5.84579	2.40301	2.80567	3.76685	4.09658	2.8594	6.82791	1.99675	2.34652	1.77046	2.17808	2.0552	1.19153	1.1615	0.346649	5.04298	4.16514	0.228483	11.4471	11.6294	16.0793	6.50635	8.45079	9.95749	4.09277	5.65492	5.91531	4.4624	6.76532	3.13129	6.45881	6.28268	6.89428	6.85841	8.42416	7.23691	7.44948	7.81032	10.2336	7.78147	3.53326	3.61595	3.38932	3.11049	3.59997	0.23473
TCGA-A5-A0GX	2.84547	3.8188	3.51353	6.88314	3.54607	3.11797	3.30307	1.48757	1.84356	3.35255	3.74092	3.19325	2.53137	5.1705	2.56838	3.08203	4.5033	3.15699	3.40334	3.69354	1.69456	5.68536	5.0785	17.1938	2.74573	3.34615	8.19266	1.7136	2.09772	5.76884	1.73728	2.38467	4.08369	1.49956	2.89287	2.15699	2.30495	2.16944	3.67743	4.15949	5.50901	3.65439	3.00926	4.10862	5.82523	6.46185	3.54006	4.23518	0.491882
TCGA-A5-A0R6	3.0956	2.52323	4.38004	6.00086	5.78022	5.21269	2.74824	5.9093	2.12968	5.55436	5.77045	7.0446	0.93981	2.36162	1.39872	5.46652	5.93243	6.20555	0.799316	1.36199	3.02938	6.53899	6.49221	7.21843	3.84585	4.86037	4.77202	2.42022	3.87791	3.70527	1.66901	3.29024	4.04453	2.20419	3.64837	2.67098	1.52286	3.26513	4.12781	1.82195	4.08262	2.99135	4.3367	4.20292	2.86603	3.24722	4.04764	2.0061	0.195739
TCGA-A5-A0R7	4.32181	2.04704	4.74049	1.31442	6.94324	4.41363	2.9728	6.97813	5.17176	6.3797	6.21439	6.58426	4.09056	4.47855	7.73566	1.70983	3.10556	3.9194	3.68982	4.64461	3.43692	6.12576	7.2563	7.87885	3.56623	5.20381	4.05878	2.81076	4.35037	3.1137	2.13092	4.1837	3.20545	2.30757	3.99855	2.64818	3.11695	4.42371	2.84157	2.41699	3.48244	3.23585	2.60927	4.85104	2.65271	4.2413	4.83666	3.1698	0.260951
TCGA-A5-A0R8	3.14394	4.05383	5.12566	6.0899	6.8261	3.41064	6.44092	4.90943	2.7699	7.11289	4.71996	2.50118	4.78218	1.67878	3.59049	1.99275	3.26133	1.29251	1.33184	1.30307	2.42188	6.32496	7.04819	20.067	3.05475	4.71828	10.1483	1.59267	2.54477	4.8896	1.24223	2.75702	4.33197	3.29142	5.99259	4.27886	3.26344	5.72511	6.05911	3.79895	8.31954	3.54956	4.5401	5.42156	5.72534	4.7537	8.91257	4.67314	0.477518
TCGA-A5-A0R9	5.12109	5.19459	3.26041	3.72854	6.48075	2.33875	5.34177	5.46206	2.21509	1.78462	4.45025	3.4225	7.66871	5.32347	0.857415	3.54547	2.41268	2.87621	1.29172	2.49766	0.816817	7.21854	4.43369	20.9322	3.67732	2.85609	9.97601	1.84508	1.61319	5.95146	2.75354	1.67912	4.03433	4.91986	3.33017	3.92239	7.94396	2.67296	6.08978	5.45913	5.81929	9.70892	5.20425	7.32997	3.25287	9.95953	2.37274	5.31371	0.429982
TCGA-A5-A0RA	3.74987	2.75784	2.55383	1.94547	6.03375	4.29589	5.26058	3.86648	2.37887	4.67236	3.88159	1.38446	3.71498	4.15584	1.29661	5.02133	2.86073	1.43559	1.51611	2.58422	2.85306	5.36276	4.48684	11.261	2.86395	2.88462	6.20285	1.87697	1.93783	3.12866	1.29641	1.34482	2.60606	2.65432	2.66471	3.1291	1.90536	3.05101	3.13176	4.19673	3.5639	4.15907	1.4191	2.33894	4.20044	3.55941	3.95003	3.53144	0.425463
TCGA-A5-A0VO	2.86165	4.82937	3.34417	2.48151	3.71495	2.59891	5.87834	3.62778	1.3237	3.74847	1.56033	2.30759	4.61003	4.18411	1.92459	4.43789	5.50405	4.51645	1.28425	3.0048	2.46928	4.48594	6.18146	16.0053	2.16313	3.78949	8.52963	1.28465	2.90647	4.96153	0.876281	2.60274	5.06413	0.76409	2.92402	3.14832	1.47784	3.7235	5.6247	2.79252	2.89348	5.96038	3.9562	5.33773	3.51175	2.61821	3.98493	3.21939	0.594081
TCGA-A5-A0VP	4.29027	7.51683	6.75874	7.36115	1.7912	3.80927	2.66425	3.22425	9.254	3.26002	3.71822	4.07494	1.2719	4.44404	4.8557	7.4759	3.79271	2.30306	5.95576	6.6364	1.9608	5.96353	5.69275	15.6136	2.67593	3.86874	8.58389	1.73244	2.05607	4.59849	1.64552	1.43269	3.64583	1.50407	1.83759	3.49784	3.49604	2.93699	4.57242	2.39228	3.98791	1.8951	7.50643	3.54723	3.9636	2.68648	3.84173	1.67775	0.445628
TCGA-A5-A0VQ	4.58316	2.77491	3.48761	4.65339	2.43004	17.6981	3.07645	2.24446	1.82477	1.70506	1.73886	2.36558	3.12081	4.63439	2.19776	3.83479	2.87388	1.98285	4.04764	1.98895	0.776655	18.4732	19.7311	10.348	2.7701	5.93575	6.35594	1.75505	2.37121	3.61894	1.25285	1.52627	3.1364	1.75351	3.99223	3.4269	1.08894	1.55208	3.15957	1.67523	1.54941	6.0082	2.4982	1.46487	3.63833	1.64388	1.9749	3.11208	0.339591
TCGA-A5-A1OF	3.89744	5.23418	5.08108	4.00496	4.29263	5.21018	3.1244	0.708921	5.32041	3.9765	2.64643	5.68993	3.47191	2.11708	1.08694	3.9271	6.70296	1.85508	2.07102	1.64443	3.05413	13.0513	12.6731	9.8972	5.90474	7.55211	5.67488	3.82852	4.28135	3.34761	5.14306	3.19414	2.61717	6.10356	3.37309	6.35781	5.3477	3.11504	7.16759	8.19512	3.55541	4.17556	7.17924	2.23089	6.46925	7.85373	3.10741	2.22021	0.137275
TCGA-A5-A1OG	5.29166	7.58721	1.7589	5.58509	2.91407	3.22798	4.20728	7.39203	4.19304	1.5543	2.6955	5.82306	4.69633	5.19934	2.09115	5.98005	3.09927	1.94815	1.07457	4.27931	1.91908	8.86793	10.3215	11.1846	4.86043	7.30795	6.60502	3.23803	4.38132	4.84957	3.41143	3.76749	4.41737	3.75922	4.8758	3.37438	3.93071	4.71084	5.4014	4.80158	2.80245	9.17264	2.43546	6.33992	4.35357	4.51751	2.78073	4.8842	0.275467
TCGA-A5-A1OH	2.86747	5.25893	6.24119	2.9946	3.90413	4.64173	3.21328	3.03179	1.26223	1.98704	2.95702	3.39298	5.63798	2.1001	1.62168	1.42912	2.37002	2.48359	4.81666	2.43251	1.99946	5.05145	8.77476	14.2167	2.44285	6.41192	8.50335	1.45967	3.67549	4.66609	1.28746	4.47671	3.8598	1.8689	4.50687	2.91532	1.89074	6.30728	4.30567	2.16807	5.43738	7.06269	3.82648	2.7062	10.1847	2.56004	5.85771	3.13935	0.561185
TCGA-A5-A1OJ	2.25862	3.4368	3.9541	2.81099	3.29861	1.65068	2.83117	4.38858	1.58252	5.86729	5.1675	4.918	3.97948	4.64937	8.7794	9.09411	4.66644	1.23663	4.42453	2.41055	0.503331	7.01533	8.46687	14.9138	3.3129	5.35017	6.692	1.66023	2.5762	3.98547	1.77972	2.81327	3.10126	3.59074	5.20758	3.40193	4.23255	4.4376	3.82593	4.36097	4.78175	2.82188	4.14992	6.48425	2.84671	5.43124	9.5411	1.65875	0.480483
TCGA-A5-A1OK	8.81276	5.71018	9.09478	3.54928	4.55784	6.49721	6.99536	5.01179	3.47376	4.6226	1.82139	3.56374	2.9288	3.0264	1.21062	5.44847	3.98706	4.97754	6.63958	2.15081	2.66757	6.37389	9.70039	14.2834	3.34651	6.35214	8.52473	1.96372	5.15587	5.52007	1.91159	4.1381	4.01057	2.24945	5.26749	3.85036	5.22396	8.23217	5.19766	4.58879	9.02364	4.0032	5.69194	7.17561	4.50982	5.60986	7.5645	9.05153	0.471227
TCGA-A5-A2K2	2.05	3.48439	5.39457	2.86083	4.61926	2.50139	2.19031	8.71667	4.30711	3.61851	4.8562	2.41335	4.60588	2.90656	2.92335	2.12478	2.8512	3.22611	4.58861	3.26757	3.53768	4.43126	6.8348	10.9036	2.40685	4.74269	6.74367	1.95223	3.33835	4.7587	2.0923	2.94732	6.44248	1.7292	3.26343	4.28349	2.06064	5.41435	4.08316	2.1809	3.65422	5.89119	3.7122	7.1743	4.67847	1.63324	5.23155	3.04582	0.484427
TCGA-A5-A2K3	3.37659	2.16405	4.51968	3.45487	4.15958	4.74433	3.83568	2.57725	5.20807	6.20415	3.56657	3.11222	3.50274	2.48842	2.32056	3.3302	0.942636	4.7997	3.92645	2.09135	0.544069	7.90502	11.513	20.3492	3.53556	6.95958	8.05738	1.55683	4.1474	3.53267	1.26779	5.70414	2.13999	2.57097	14.2323	6.24249	2.24994	9.11006	5.1489	4.49777	4.36874	3.23144	3.5447	6.90844	3.45243	2.03326	4.19418	4.18034	0.482226
TCGA-A5-A2K4	4.60131	5.19811	0.742924	7.55798	1.81039	3.80214	5.54786	1.6724	3.90249	4.46444	1.33612	4.14786	5.69844	4.24801	5.77936	4.57672	0.58642	1.03411	3.06576	3.62394	9.03469	6.83966	14.0552	10.3816	3.67986	9.44459	5.87551	2.51123	6.33116	2.8716	3.10614	6.38782	1.28124	4.87664	9.75685	1.16121	4.89305	7.6549	1.22168	3.9461	5.89963	4.82172	5.3572	3.82678	4.50035	5.11791	4.00552	4.00216	0.215464
TCGA-A5-A2K5	3.36118	3.94088	3.18796	2.16946	3.83403	2.93879	2.57439	5.32403	6.42396	4.5856	3.64132	1.45976	4.86529	3.24171	3.74774	2.05451	3.52699	2.24033	6.58576	1.56798	1.38369	8.09631	10.7626	15.1788	3.56684	5.76826	6.79157	1.69885	2.99056	3.98275	2.10151	3.45974	3.39022	3.08123	6.3202	2.40304	2.54797	5.13216	1.69061	2.74181	4.55105	7.63503	7.661	4.33402	4.15796	5.06903	4.51672	4.70824	0.454577
TCGA-A5-A2K7	6.26803	3.35538	1.36687	3.86023	3.42902	10.8853	3.27884	2.75952	8.05012	2.04691	2.31978	6.8702	1.9874	1.91435	4.17224	4.69068	2.03024	3.9741	1.63606	1.90924	2.12708	9.44574	15.6214	12.5286	5.84468	11.9575	7.05648	3.19713	5.78084	3.07903	3.85527	9.48333	1.79804	3.45902	7.06989	2.41299	9.87785	8.05638	1.22235	5.43984	5.84294	5.80566	4.4077	3.20673	2.28469	9.41862	3.40814	7.97187	0.323859
TCGA-A5-A3LO	5.6294	5.40478	6.32061	2.30368	4.16329	4.49277	2.4784	1.70622	5.79902	2.60803	4.32341	2.5189	1.694	5.11728	6.03163	2.02399	1.83134	2.79668	4.46535	3.41399	2.36297	5.16326	15.575	9.1663	2.70167	7.40131	4.62594	1.76314	4.01613	2.67508	1.58793	3.26949	2.68979	2.2838	4.63881	4.76099	3.07068	6.82454	3.83732	2.3103	5.18242	2.55807	3.09001	3.55182	1.98205	3.40833	4.6253	1.28001	0.371327
TCGA-A5-A3LP	5.43566	3.15419	1.79573	5.71479	2.98093	2.19557	1.24499	2.87325	6.17488	7.65208	2.134	4.09545	1.45821	0.911481	2.63228	3.94537	2.07519	2.56832	4.10508	1.98934	2.47383	5.60203	11.4499	10.6121	4.12235	9.37468	8.6824	3.54534	7.39176	5.7716	3.05467	7.02597	4.49826	2.5741	6.90434	3.34328	4.75325	10.3633	4.58512	10.7094	6.97135	7.53797	9.48734	9.05352	5.22004	7.49974	5.24871	3.28896	0.34666
TCGA-A5-A7WJ	3.57046	3.52574	1.70633	3.61241	2.64999	11.5107	3.6738	1.83824	6.19026	5.26944	4.38739	1.17312	1.08973	2.13328	4.98977	2.43472	1.44343	1.65993	2.96461	3.76732	0.0079932	7.84797	22.98	10.3501	4.03363	11.6607	5.75536	2.22435	5.23949	2.87013	2.14466	4.31399	2.95336	2.69701	4.75275	1.97889	2.6902	6.79616	3.44469	3.40519	3.9007	3.04643	4.42229	2.90488	3.1318	4.65785	2.91794	1.54819	0.361133
TCGA-A5-A7WK	2.46482	5.92401	7.92229	5.34893	5.92563	3.25891	3.53639	3.39212	2.82405	5.53915	2.35238	2.88143	2.66057	3.30111	2.64563	4.57161	2.90185	1.56565	3.19099	4.60581	1.91572	5.78639	7.48868	11.8651	3.07985	4.7779	6.29978	2.60598	4.00113	6.01855	2.45535	4.07856	6.30106	3.08189	3.32925	4.16415	5.89655	4.80409	3.09179	5.71647	4.54718	6.3068	2.5341	5.60278	3.05299	4.72658	4.2843	3.65684	0.451069
TCGA-A5-AB3J	2.89127	3.55286	5.3019	3.14746	4.71489	3.54354	2.74827	3.21125	2.72837	2.67511	2.73001	3.01659	3.64947	6.41014	6.63162	1.75264	1.79778	5.20149	3.51624	4.19555	5.46534	5.71741	7.45154	11.3202	2.84312	4.59281	6.15117	1.64623	3.16483	5.74629	1.4454	2.76965	3.90889	3.04381	3.35259	3.79572	2.67297	4.16747	2.22127	2.69949	4.1282	4.75038	4.18531	2.97171	4.2786	5.46854	6.53689	3.97853	0.42503
TCGA-AJ-A23M	5.52723	4.18581	2.53533	2.89105	4.06426	7.92626	3.92316	3.36032	4.63059	8.60166	3.01124	7.30376	5.11805	4.69558	3.68546	4.9938	2.5424	4.70171	3.76421	3.51627	6.70243	9.22542	9.00979	15.0414	4.29129	6.52896	7.54989	2.50934	3.74429	3.47617	2.07864	4.61672	1.42039	2.79511	4.03798	2.86574	2.76297	6.78791	5.09407	4.58534	3.7325	3.651	2.2315	4.60138	2.29683	1.39964	5.48664	3.93822	0.285527
TCGA-AJ-A23N	5.77505	4.74291	3.12259	1.71037	5.06727	4.05685	1.04631	5.88574	1.99838	3.7961	3.18226	2.17111	5.42272	4.90799	3.38111	4.60722	3.14798	2.47201	1.95199	2.40988	2.89411	10.3289	6.9442	15.2265	5.39204	4.55836	6.55356	2.55636	2.74862	3.73614	2.57545	2.51256	2.73083	4.14962	3.9269	4.11974	3.56309	6.54969	5.54554	7.44505	4.46244	8.46738	2.84754	4.09772	8.05736	8.93183	4.44049	2.50844	0.262861
TCGA-AJ-A2QK	8.29229	4.32323	4.74737	4.42534	2.93035	5.77375	6.3861	3.57131	5.1203	2.24237	2.50533	6.54528	2.43506	1.72965	8.44835	2.2258	1.46889	3.35158	4.87648	1.31197	1.68831	11.4712	20.5744	8.92541	6.50429	10.4683	4.6628	4.46237	6.14092	2.78693	4.38338	5.7304	2.03629	4.95807	8.41723	2.53388	7.4665	6.01205	3.80479	7.15457	8.15089	3.96336	4.18695	3.68462	5.32957	5.37365	2.9218	4.19587	0.129164
TCGA-AJ-A2QL	5.62932	4.44672	6.34508	3.11556	4.08621	1.03538	3.10847	2.81643	7.24352	3.17592	1.05306	10.776	5.7103	5.33788	4.01343	4.75513	3.4156	1.46487	3.07168	1.86737	3.02474	7.18437	12.268	11.1355	3.30688	6.58711	5.55742	2.04314	3.7367	3.95175	2.70776	3.57383	3.01858	2.83768	3.93939	2.05976	2.99652	6.33831	2.90699	4.11271	6.15355	3.20906	2.24287	5.36793	6.37554	2.94827	3.76722	3.44989	0.264706
TCGA-AJ-A2QM	5.15187	6.92996	6.39572	3.6649	5.21203	4.99505	4.09611	3.25465	2.43683	7.10074	1.57895	1.17626	2.93961	4.19901	3.00274	3.15537	2.23755	2.17199	5.14294	1.69747	1.32891	6.41798	12.0531	11.0146	3.48458	6.7669	6.07122	2.37062	3.96644	4.78543	2.49274	3.68422	3.27548	2.32329	4.7626	3.42844	5.47562	8.65697	2.53619	4.31849	5.87301	4.17209	3.26797	4.10058	8.52137	5.03126	10.6615	7.49721	0.245836
TCGA-AJ-A2QN	3.09961	3.42321	5.00502	4.40393	2.38728	2.80201	0.351809	1.97	5.66503	4.60945	5.25965	0.780024	6.01953	1.90827	1.00096	6.18225	2.72584	3.02648	4.80306	1.82588	2.46351	8.76702	13.7359	12.6846	3.85046	7.12377	5.74437	2.2016	3.08386	4.00425	2.38627	5.13701	3.52221	1.81322	6.27524	2.73738	2.1558	4.04843	5.1463	4.08249	4.23036	3.03267	3.94336	4.67612	7.70196	2.16379	5.37473	9.14368	0.263631
TCGA-AJ-A2QO	4.19596	3.80936	4.70377	4.43625	2.48352	1.4158	4.08146	4.98629	6.04549	1.96758	2.18425	6.65031	6.47745	2.36164	4.07426	3.62606	1.06769	4.06818	2.44917	1.29165	2.92637	9.38458	17.0454	8.94515	5.89352	9.37323	5.08939	4.64738	6.85713	3.22904	4.25343	6.15443	2.45576	5.22808	6.95964	1.62779	4.59372	6.49466	3.44218	6.26726	5.77873	1.86255	10.4954	6.25803	3.75338	9.60737	7.34002	4.7311	0.152055
TCGA-AJ-A3BD	2.95041	1.9689	4.90371	3.91905	2.73181	3.68889	3.40409	4.1346	1.75946	3.4165	6.38692	5.18171	0.594962	3.16574	1.42886	2.77463	3.35104	1.89823	2.78182	2.82566	1.93154	11.378	15.0842	11.5628	7.32327	8.90315	5.49876	4.84109	5.58629	3.09192	5.2867	5.99993	2.08786	4.82077	7.7337	4.37904	5.05566	7.54021	9.16251	4.69603	5.95661	11.7108	5.36098	3.14246	4.18944	5.97364	4.02109	3.98018	0.182132
TCGA-AJ-A3BF	3.10919	3.69866	2.9369	3.27498	1.46371	6.13795	7.66382	4.74904	3.11972	3.5623	3.38276	3.48345	3.0805	4.29121	4.95693	1.56499	1.14954	2.16702	2.85293	1.12115	2.00865	10.6988	14.4182	13.0616	5.82744	8.27133	5.76769	4.04629	5.06148	2.71648	3.99455	5.96226	2.11391	3.87386	9.78132	3.19584	5.77527	6.83509	2.52893	7.34824	6.4998	5.87979	6.38002	9.28518	1.30948	6.13629	2.15229	8.25166	0.173173
TCGA-AJ-A3BG	4.91678	3.33919	3.50236	6.44054	5.57576	3.97179	7.84821	4.43717	4.66371	5.32852	2.78555	2.52757	1.79717	2.39136	6.48852	3.06198	3.00933	1.89381	4.75004	2.43334	0.607925	8.5542	13.347	13.5739	4.74728	6.80581	6.13646	2.79361	3.5096	3.52051	2.44874	3.91633	2.81729	4.01058	6.00983	3.90168	3.76294	5.54627	5.12376	4.01188	7.48842	4.94712	5.65805	4.20602	4.36441	4.80671	8.10929	5.96738	0.247855
TCGA-AJ-A3BH	5.56052	3.90793	2.39136	4.34996	1.69274	2.49227	5.90659	2.05227	2.52435	4.32009	1.85433	2.27515	6.32557	3.52659	2.23023	6.32466	1.39408	1.25538	2.90028	3.0596	2.95239	9.48387	22.4073	9.6042	3.74992	8.11386	4.125	1.83632	3.21952	2.54244	1.82688	3.22377	4.23664	2.91864	4.22471	6.5085	2.531	3.17567	10.1159	2.57627	4.04057	3.32019	3.6441	6.34714	3.67224	2.91629	3.92209	4.13613	0.251739
TCGA-AJ-A3BI	1.38831	1.57499	1.69296	2.27185	1.7077	2.37573	1.88475	1.60678	2.48714	1.99929	3.27261	2.26134	4.63541	4.83015	3.30801	0.332245	1.04491	2.11401	4.48457	4.44904	1.24464	1.66897	2.3853	2.26643	2.26356	2.92152	3.65033	2.30557	2.57037	3.92324	1.75922	2.03887	3.5393	1.86101	1.69525	2.6576	1.82814	1.7368	2.19221	1.70048	1.4917	2.38713	1.68375	0.885898	2.21058	1.33411	1.33442	1.87521	0.23717
TCGA-AJ-A3BK	4.92565	4.97066	6.47215	2.82563	3.98525	6.79661	7.64396	4.58221	5.45157	8.35078	2.14776	2.85929	1.13812	3.1703	4.56379	0.10314	1.10203	3.59993	1.35318	3.04292	2.18727	11.8638	15.6266	11.2755	6.92028	7.99752	5.5256	5.0505	5.30401	2.61056	5.79841	6.38737	2.18434	7.81878	6.03672	1.21163	7.9737	6.7647	2.36634	8.40404	7.64922	1.07308	8.53264	3.80633	2.97851	8.04131	7.23866	8.38765	0.143148
TCGA-AJ-A3EJ	4.72482	3.56644	1.50435	4.63196	3.29161	0.227783	4.80719	2.90069	4.90157	3.29789	1.63821	1.58261	1.40955	1.39322	0.450178	1.45399	0.768102	8.40917	1.15719	2.89627	6.96312	10.9913	13.3619	9.55756	6.43916	8.66718	4.48968	4.5316	4.61499	2.22459	4.06917	6.78753	2.2168	5.52283	6.09564	2.24314	4.86249	3.7176	3.05535	6.52588	8.88408	2.36275	4.47345	5.84643	1.99249	6.4561	2.56785	2.08956	0.130397
TCGA-AJ-A3EK	4.62447	3.65241	4.02051	7.64667	3.94774	6.04674	2.08148	3.62542	2.98106	4.58587	1.46772	2.88106	1.65639	1.53216	7.77528	1.74571	2.04671	7.03486	5.02595	0.860853	2.52282	11.4899	14.1823	13.4349	6.5144	7.49232	6.81582	4.39857	4.26431	3.18678	4.9671	5.63151	2.25039	6.38699	8.24123	2.78131	7.67735	6.22941	3.64994	6.5386	6.50053	8.85788	3.52534	11.6632	2.97049	8.09829	5.19486	4.51123	0.168611
TCGA-AJ-A3EL	3.22492	3.11814	7.56558	8.17456	7.91516	1.1332	3.88796	0.969119	2.6625	3.10359	4.79957	3.46704	2.11718	1.08743	2.01034	3.05882	4.03405	1.85499	3.0107	2.15253	3.95116	12.681	15.1953	14.1853	5.82491	7.53789	6.3054	3.37081	3.96971	2.57389	4.13509	7.78679	4.20741	4.46269	6.87707	5.991	6.16744	10.2006	7.2674	5.64058	7.40589	7.09798	2.90853	2.39331	5.90694	2.93955	3.21183	7.54219	0.253743
TCGA-AJ-A3EM	3.38759	4.34209	2.04036	3.05384	4.60447	1.71964	4.07595	1.01572	0.345575	1.95463	4.61836	1.32399	1.35054	0.866895	0.715219	1.75026	3.66545	1.78837	3.75797	4.78999	1.47943	10.525	19.8847	15.1493	5.01537	9.72188	8.25339	2.69556	4.58402	4.46082	3.19291	5.74838	4.64723	4.38344	6.42155	12.9915	4.92791	4.89523	5.19606	5.79177	6.47824	1.35557	4.87441	2.80434	8.02325	5.05	3.18973	3.87223	0.280247
TCGA-AJ-A3I9	1.48495	5.10079	2.99369	4.60332	3.1765	5.5076	5.64358	4.18103	0.558066	7.44314	2.9472	4.36725	9.21231	1.78262	0.596976	5.50598	2.69676	2.39814	4.22177	2.45399	1.99288	7.58176	7.84119	17.8561	3.19414	5.67944	8.50956	1.44894	3.27472	4.2747	1.57016	3.09781	3.42589	1.72398	4.99134	5.06173	2.85372	5.29809	7.94911	2.61911	5.15696	5.07461	3.97881	5.20346	5.78508	2.97084	4.96255	3.31319	0.481255
TCGA-AJ-A3IA	6.04209	6.00265	3.75983	3.05015	2.34592	2.75297	4.97209	5.63342	2.30777	3.704	5.57374	3.83203	4.11345	1.91776	1.66479	4.39439	3.63646	2.83109	1.60396	5.61898	1.94575	10.307	8.60564	17.3728	4.6197	4.46829	6.76623	2.51487	1.84446	3.52104	2.68305	1.70521	3.56765	4.80677	3.81619	5.6765	6.23751	3.92061	7.60111	4.27633	3.10817	6.84296	5.57655	3.24433	4.20791	5.75294	6.04659	3.96791	0.257149
TCGA-AJ-A3NC	2.06437	2.14791	4.03566	7.55361	5.10805	7.90461	4.91932	4.35659	3.31727	3.24551	2.14897	5.2801	5.21339	2.7908	1.59436	2.50523	2.76433	0.621611	2.6584	7.23801	1.82675	7.56945	5.8732	17.7569	3.62138	3.44933	8.12849	1.91749	1.44487	4.77689	2.69646	1.24157	2.31803	3.12204	1.33224	1.76778	4.10079	1.74544	3.17503	5.19717	2.95679	7.7534	6.25314	3.0641	7.18181	4.64329	5.19548	1.90684	0.345112
TCGA-AJ-A3NE	1.75286	3.14362	4.2042	2.4998	6.45061	4.86	1.59192	1.02335	5.15623	1.93271	4.74983	3.88855	4.83245	5.27795	2.63862	3.6439	5.89065	1.93656	2.54776	2.81186	0.82156	7.66216	6.65105	17.1253	3.56214	3.38248	7.64566	1.88188	1.78457	3.57334	2.14533	1.01657	1.88493	2.38196	1.77937	2.03265	1.99503	2.4669	3.11337	2.22697	3.07318	4.55036	3.50277	1.12661	4.57473	4.22164	2.45816	2.97959	0.332763
TCGA-AJ-A3NF	5.56815	2.44033	4.3215	2.08081	4.7344	1.9857	3.3567	3.72883	2.5416	4.05059	2.99543	2.86801	4.17917	4.33053	0.418163	7.7463	3.22688	1.86858	1.7704	2.94279	4.6276	7.98088	9.38677	12.4682	3.80122	4.11773	4.757	2.16701	2.31507	2.09512	2.41707	2.12246	2.05321	2.13014	1.36688	2.70456	1.51875	2.18239	3.10167	3.12138	4.24605	7.28374	4.59204	2.09833	5.37454	2.0789	2.035	4.33137	0.308551
TCGA-AJ-A3NG	4.96542	9.00437	4.41709	4.906	3.30736	4.11193	4.64027	2.84416	3.98424	4.364	5.9492	1.86046	4.63156	2.33345	3.00222	3.01144	3.82267	1.97106	2.59565	2.28765	2.21285	11.0425	6.24862	17.3644	6.3199	5.08612	8.74149	4.06526	3.43559	5.52603	3.56326	3.22858	4.39954	5.01672	4.50133	3.07111	5.59454	6.4285	2.77658	7.05816	5.52075	4.57104	6.94248	5.94535	6.56352	6.24243	6.22558	5.1677	0.207719
TCGA-AJ-A3NH	3.27857	4.64325	2.18104	3.96906	3.66155	3.06446	3.82501	7.22408	3.00968	4.44445	1.38235	2.48593	2.58583	5.35564	3.40247	2.33337	2.28589	1.00437	7.15922	3.51934	2.36281	9.32338	8.08579	17.701	4.35941	4.78827	7.17678	2.38991	1.95294	3.49906	2.39575	1.99281	3.02173	4.94781	2.15719	5.77878	5.67766	2.62552	6.59671	5.90173	2.35551	4.98866	5.49989	4.63843	4.36619	5.59628	5.84136	9.91421	0.253261
TCGA-AJ-A3OJ	3.85502	3.03976	4.64499	3.33198	2.28402	5.78547	4.22464	4.69393	2.03257	2.40627	3.51974	3.16044	4.24213	2.63028	5.7485	1.77842	2.56835	4.53603	3.02833	5.53097	4.59135	7.15305	11.1173	10.0708	3.68754	5.90264	4.95746	2.63332	3.97973	3.20746	2.48671	3.05078	2.59784	2.48608	4.18536	2.35399	3.1026	2.68377	0.712791	2.71476	4.17692	4.64373	3.604	4.95473	4.17238	4.91954	3.89917	7.03178	0.240034
TCGA-AJ-A3OK	2.64668	2.64804	3.809	5.21122	3.155	7.68728	1.7303	2.69031	4.06713	5.05371	1.72562	4.27863	3.02145	2.98077	4.06745	4.06488	9.62524	2.99762	7.90493	1.54844	0.715322	8.36437	10.316	13.191	3.32645	5.36663	4.78041	1.67294	2.72151	3.09602	1.18635	1.37312	2.37285	1.41287	0.968872	1.93963	1.40481	0.947662	3.29925	3.11995	2.52571	8.79327	2.43632	4.31398	6.57705	2.00887	1.21492	8.16864	0.38739
TCGA-AJ-A3OL	1.56567	2.57089	0.947725	6.97615	2.55383	4.85458	2.88825	4.95627	3.90212	5.9945	2.95561	5.05996	2.10061	1.59019	3.03785	2.09009	5.3626	2.77854	1.93478	3.06724	1.79971	11.5386	11.3068	15.5431	5.58161	6.24737	6.56761	3.53999	4.22027	3.49878	3.20871	8.05108	1.94607	3.14654	5.81017	3.16162	7.37686	6.19173	3.6359	5.92591	1.67711	2.77908	5.32512	6.59109	5.43895	3.471	4.43296	4.10762	0.233892
TCGA-AJ-A3QS	5.17178	8.39044	4.94458	6.72937	4.72645	1.32732	6.09063	9.2538	2.24506	4.05988	4.81412	1.68227	7.28122	3.564	2.45603	2.87289	4.02617	1.34616	2.32948	7.44195	0.981013	7.91601	5.76937	18.5038	5.3474	4.26675	8.61416	3.58345	1.99809	3.73793	3.22517	2.27642	3.86623	4.04575	2.82809	6.59969	3.90549	3.70333	5.09238	5.41006	5.37452	5.49697	6.56815	3.99181	2.93804	7.7887	5.58147	3.54089	0.30607
TCGA-AJ-A3TW	4.35132	3.97335	3.74858	6.35298	4.64872	2.414	3.63134	4.92251	5.71246	2.71115	5.71597	3.50097	6.52766	2.79608	0.249496	1.93617	2.73499	4.50277	2.49716	4.7095	1.52626	9.01767	7.06074	19.5236	4.23453	4.14523	8.3828	2.27574	2.0164	3.74257	2.56711	2.2572	7.13656	3.65223	3.49614	8.05159	5.16975	3.14533	4.2164	5.73029	4.40058	4.33089	3.12373	4.24806	6.84347	2.7979	2.48138	4.99813	0.411419
TCGA-AJ-A4ZG	4.7798	3.93502	7.71229	1.99228	3.63539	5.21246	4.36305	3.08297	9.08797	4.32552	1.19172	1.71652	1.48138	2.54387	2.57434	1.75805	4.00503	6.70137	2.61151	2.62685	1.41797	9.4462	14.2461	12.0466	5.59157	7.42859	5.14347	3.18088	3.99911	2.2853	3.14348	4.28738	1.43368	3.09034	3.98422	0.752307	5.27385	6.43594	1.04941	5.13128	4.73527	7.12278	4.62049	6.45064	4.77285	4.83478	3.95974	4.48843	0.239108
TCGA-AJ-A5DW	1.48679	2.792	3.9689	3.89469	4.32182	2.55078	4.0976	3.38658	2.48062	3.95062	3.13541	2.36041	3.24147	5.64097	7.13882	2.45392	3.88296	2.14738	1.2565	1.442	4.51494	8.78335	4.2245	15.7744	3.72601	2.60314	7.94992	2.17566	1.65885	5.29479	1.72591	1.08411	3.16907	2.0634	1.60903	4.33652	2.68577	1.72749	3.84749	3.08892	2.48899	3.74457	3.79553	1.58146	5.47225	5.50794	3.87065	4.6963	0.348688
TCGA-AJ-A6NU	3.31148	2.45386	4.76336	2.91713	3.59176	10.1607	2.99204	2.81257	4.58878	2.97308	2.6819	2.78838	1.43358	2.1967	3.26468	4.29447	1.63164	3.35594	1.68217	1.45264	0.714277	9.09032	6.99324	14.4423	3.36583	4.00272	5.81639	1.85869	1.96479	3.53062	1.49734	1.64826	2.27676	2.0561	1.81099	3.02187	2.1582	1.68351	3.52641	3.93013	4.21471	3.57131	1.4729	3.03659	2.99838	2.99871	3.627	3.44834	0.380822
TCGA-AJ-A8CT	4.52668	2.98463	2.31344	3.95064	4.09848	6.50381	4.77389	4.09008	4.6258	4.29256	4.88679	4.13737	2.55447	2.80433	1.89166	4.32846	6.54112	1.66562	1.2871	4.72563	1.40099	17.9745	8.89138	9.32186	8.17606	4.53026	5.23498	4.20064	2.64466	2.96838	2.90058	2.25697	3.28174	4.15231	2.42924	3.41261	4.32741	1.4516	4.14219	5.46268	2.10674	5.27712	2.62493	9.6433	3.55099	4.09034	5.21757	3.46296	0.101087
TCGA-AJ-A8CV	3.4815	6.17195	7.7762	6.40408	2.91981	6.96593	3.34261	4.495	6.14352	1.22318	4.30509	4.2401	5.68674	1.93615	1.21271	3.08078	4.60496	2.20235	3.75586	1.34282	1.40546	10.0265	6.73306	14.9631	5.19485	4.47181	8.07424	2.70453	2.8328	5.7269	4.89857	3.01663	3.51044	4.83491	5.48662	2.84985	4.81355	6.8533	2.36258	3.17238	5.67031	2.49656	3.67251	4.62566	3.46446	4.53275	6.31092	10.8286	0.293457
TCGA-AJ-A8CW	3.65299	3.6199	1.65396	4.25446	3.45688	4.73995	3.7715	2.80985	2.61032	6.47344	4.23333	2.1848	1.25476	3.82413	5.06433	2.59078	0.952291	2.98608	3.07807	2.8497	4.8964	10.4215	6.58178	15.9188	4.74744	3.66524	6.46532	2.75793	1.69228	3.15432	1.76386	1.44473	2.67352	2.1228	1.42474	3.5717	3.1317	2.07921	6.56554	3.48919	1.16883	4.1296	6.27505	1.90713	4.89248	2.84359	3.61487	2.28798	0.275126
TCGA-AP-A051	2.43774	2.65756	1.44008	5.56422	1.73326	2.35487	5.2297	3.96287	4.29844	11.1519	2.22856	3.07795	3.40158	2.75815	1.5331	2.86966	1.80696	1.17984	5.2678	1.15066	4.38218	4.57118	4.74211	6.92058	2.87839	4.51477	6.28061	1.97397	3.33744	5.43594	1.8835	2.60204	4.50032	1.65218	3.06652	3.28938	2.16633	2.46549	3.22589	4.1459	2.57746	2.77028	2.56641	1.39793	3.20566	2.66589	2.99126	2.7523	0.303999
TCGA-AP-A052	2.79461	2.05663	5.36942	4.83306	2.84372	5.31295	3.50978	0.363241	2.79489	6.94191	2.12345	1.91566	5.90088	1.88131	4.63719	2.81686	1.71086	2.48734	6.39482	2.314	0.187943	5.53374	2.47105	4.54076	3.69255	3.88412	5.71209	2.21179	3.13042	4.54408	1.675	2.57411	3.35579	1.79652	1.86773	1.46991	2.714	1.10422	2.49185	2.13095	1.86658	1.47025	4.32954	1.68945	2.0566	2.73094	1.56696	5.35577	0.323041
TCGA-AP-A053	0.162237	9.04454	8.03367	1.88726	5.41592	5.68938	0	7.09001	4.97561	1.70223	3.07739	1.69919	0	1.80244	1.51041	1.80887	5.28809	3.16769	0	3.5552	3.26125	23.2176	5.5131	7.88021	11.731	9.14825	4.65235	5.93785	6.88962	3.17925	7.40519	4.52762	2.10335	8.52331	4.11487	1.9421	13.8568	5.40379	2.56122	11.581	3.82909	2.98583	7.67724	4.25609	9.48459	4.5094	6.32296	6.35588	0.0680604
TCGA-AP-A054	4.22363	0.832019	2.26979	2.0618	1.10063	3.235	2.88037	0.748839	3.3566	2.35158	1.32457	2.08468	0.690779	2.36685	2.64336	1.47735	1.38953	1.71589	2.1794	2.80193	3.12291	7.16734	4.21785	3.75624	3.76978	4.28683	3.49485	2.28028	2.61616	2.8224	1.92786	2.15986	2.24385	1.58313	1.89534	2.16456	1.05218	1.71214	2.19929	3.80413	2.13772	1.94446	1.20718	0.95184	2.44295	3.47788	2.61808	4.27782	0.410004
TCGA-AP-A056	4.80322	4.89878	6.77165	4.99775	2.76201	5.5348	6.15008	4.32266	4.84079	4.03963	2.98048	3.66402	6.50689	5.69911	1.27076	2.11273	3.07539	3.97854	1.7167	2.46686	4.60481	10.1529	5.4406	10.3606	5.69155	5.26168	5.0887	2.94263	3.71101	2.7288	3.21381	2.55265	2.20407	5.0709	2.42185	2.54127	6.1035	3.00551	3.23735	6.83445	2.66654	5.35592	10.7967	4.24424	2.96339	4.9607	1.96334	1.44034	0.16369
TCGA-AP-A059	4.63002	5.3875	5.78465	3.50376	2.61367	4.6323	4.16866	2.51291	3.14647	3.17564	3.13923	2.17346	1.64448	5.7475	2.50338	4.44298	0.474061	2.06299	3.4913	4.64215	3.1652	6.16544	4.79764	12.0031	3.48578	5.58059	7.1744	1.60121	2.76784	3.58931	2.46828	1.79928	2.29069	3.75812	2.00686	5.54107	3.84426	2.60059	3.91655	7.83725	3.97793	8.62223	5.66181	2.79728	4.21555	6.56808	2.25028	7.34541	0.419393
TCGA-AP-A05A	3.75804	4.97628	4.14314	0.404653	2.72629	8.03598	0	1.44214	3.23886	0	1.93803	4.55692	0	5.63642	6.03429	0	2.84788	6.58503	0	4.14652	3.27145	20.2055	3.972	9.23537	10.1704	3.93454	5.16856	5.61218	2.88859	5.00835	4.5211	2.27097	3.65403	9.35397	2.30424	2.47163	15.413	2.3011	3.98374	18.3511	3.33178	3.69127	10.1038	3.19827	3.47709	2.10618	2.38445	6.43076	0.057628
TCGA-AP-A05D	2.24411	1.68653	4.57723	5.48768	2.46024	2.80295	6.76485	3.07398	1.29278	4.12103	4.13513	2.73119	4.48466	1.83873	3.84486	2.00795	2.57544	4.1987	0.708703	2.91987	0.989803	11.8948	6.08829	8.28925	5.44134	5.74535	6.54854	3.26521	3.64377	5.20876	2.12533	2.27694	3.45204	5.14666	1.55564	2.35211	6.96686	1.89343	4.34676	8.19071	1.94712	6.13053	5.40973	2.19479	6.44917	6.65512	3.90704	6.83335	0.242127
TCGA-AP-A05H	4.10947	2.9191	4.89605	4.41376	1.96053	5.91936	5.14137	6.35983	7.62623	7.20131	2.3667	3.77833	5.5133	2.0369	3.26514	3.86895	3.949	6.15293	3.54646	5.90222	7.05174	7.10481	5.73339	10.8661	3.90254	5.0219	5.8684	1.96807	3.69252	3.71213	1.87586	2.04368	2.59466	2.67937	1.62852	2.33239	4.69753	2.86036	1.70221	4.48482	3.61604	6.58192	5.16396	3.9114	3.31124	5.88637	2.94054	3.44427	0.298925
TCGA-AP-A05J	3.88274	3.89203	2.32953	6.46254	4.30675	5.09317	9.3463	1.93209	2.71293	7.07124	3.84432	5.45048	3.45953	5.80306	1.78336	6.22385	2.94149	1.42831	3.31204	7.2489	3.62833	7.58236	4.71861	12.3928	4.12518	3.93058	7.91182	2.57699	2.57569	4.76355	2.45823	1.63887	3.3905	4.25179	1.97749	2.38863	5.2222	2.39701	2.69962	4.94559	3.8206	4.63883	4.67466	3.21697	8.49082	3.36874	4.24446	5.72131	0.321457
TCGA-AP-A05N	5.418	2.64518	0.834433	2.8457	1.32404	2.78335	2.47	1.38046	1.13686	3.62961	5.95091	1.9977	1.79785	1.41561	1.35761	1.22543	2.27122	1.0625	2.40326	4.15312	5.43044	31.3321	9.86946	10.5158	10.6204	6.33036	5.45479	5.65578	3.0388	2.69592	5.33753	1.70887	1.68356	5.17065	1.88374	1.12711	2.45501	1.67496	2.10946	0.362011	1.81727	1.07958	3.19274	2.80231	1.39895	8.01107	2.64801	1.95487	0.031376
TCGA-AP-A05O	6.33307	2.03368	2.43696	3.38895	3.19727	3.78202	3.4011	0.650533	1.48516	7.80009	1.41715	2.4604	3.50911	2.66081	2.65562	3.71787	0.760208	5.37005	3.69288	2.48079	0.713373	9.04528	5.03969	10.2498	4.33401	3.51663	5.57171	2.20332	2.0117	3.66174	1.76495	1.37021	3.51071	1.82947	1.24347	2.51275	3.79832	1.65832	2.92065	5.70612	1.66198	1.78107	5.4865	3.40339	3.67786	5.77969	1.15544	2.92991	0.213897
TCGA-AP-A05P	5.4894	4.46214	2.96016	2.92421	2.38496	4.58912	4.92211	2.76535	4.08314	3.95557	2.26821	4.60179	7.08273	5.69715	5.59643	2.39693	0.52498	3.60876	0.49374	2.36302	4.60903	7.28871	6.20634	10.2246	4.15711	5.11849	5.98744	2.35372	3.04404	3.89051	3.15872	1.53796	3.20248	3.36878	1.81023	1.95977	3.44505	1.84204	3.23907	3.99158	2.27388	2.68188	3.40708	2.55235	5.86682	5.10599	3.74493	2.6707	0.273014
TCGA-AP-A0L8	1.49415	3.96469	4.58802	0	2.53339	6.23024	0	7.97742	2.68325	2.02038	3.39836	1.97231	0	4.94299	5.58248	0	4.20649	2.49217	0	0.866449	2.81975	34.298	4.91388	8.84023	17.0577	4.47374	6.14072	8.9971	3.59574	4.04297	8.72418	2.55449	2.97986	12.0464	2.75201	2.42104	8.14989	3.16311	2.44817	4.35244	5.5794	5.83007	0	6.66895	3.05987	2.85975	3.02416	4.45147	0.00324241
TCGA-AP-A0L9	0	4.17175	3.87084	0	8.12282	6.33881	0	2.56003	1.76743	0	6.46908	4.31444	0	2.77518	6.44371	0	3.87228	2.49722	0	2.90067	2.53009	33.6497	4.53854	9.90324	15.3748	5.15107	5.02777	7.59248	4.05538	3.10332	7.6515	2.40976	2.18048	13.7525	3.35815	2.53231	10.2837	2.93973	3.68135	3.3972	3.31092	2.31324	4.67532	7.11904	6.14992	3.62286	3.60309	7.76348	0.00959725
TCGA-AP-A0LD	6.50104	5.83219	8.93102	3.04887	5.52623	2.81372	0.475749	3.87224	7.3811	1.61297	6.80086	3.9343	1.76777	1.62004	3.1501	1.16701	2.3221	6.27626	1.56053	2.65818	1.40414	15.3585	4.72773	8.74342	10.0998	6.10074	7.23772	6.23601	4.87716	5.01114	4.86681	3.60306	3.05722	6.46423	3.79643	3.36354	10.9803	5.09639	3.08389	8.95935	4.53311	5.14166	7.34188	5.99878	5.18529	6.85028	11.7011	3.41789	0.118338
TCGA-AP-A0LE	2.98271	2.46591	2.05962	3.94805	4.02758	1.13689	3.42083	1.94312	2.80544	2.24625	1.61505	0.78366	3.11523	1.35869	2.42725	2.75263	2.53583	4.26346	3.18075	2.50768	1.34739	6.21084	3.18628	7.03923	3.09339	2.89184	4.56845	1.69936	1.82693	3.8927	1.59373	1.60738	3.53112	2.61703	1.02115	3.80857	1.80182	1.84807	4.07423	2.7238	0.495384	4.14689	2.18745	0.936237	2.17444	3.66694	2.23345	2.65865	0.477195
TCGA-AP-A0LF	4.14097	3.93351	2.64484	2.88909	3.95042	2.533	2.21845	4.95975	5.74844	1.32018	3.69654	4.0005	4.52525	2.66799	4.80259	0.508397	3.00665	6.23262	7.27015	1.38972	6.18291	14.5146	6.92372	7.04182	8.38391	8.78336	4.44521	4.48907	5.71016	2.63692	4.70082	3.92772	1.89419	7.33852	3.66704	0.974538	9.36543	5.52579	3.09227	7.43671	4.00335	3.56301	2.70857	3.75828	2.43385	13.0864	3.56236	5.92106	0.0929106
TCGA-AP-A0LG	4.00343	1.80196	3.93642	5.17928	2.4849	3.65984	2.07608	2.30666	1.1199	3.17464	1.59792	4.06568	0.351582	0.439094	2.84079	3.02022	0.995368	4.40389	3.10175	2.37238	2.34104	9.75218	4.21018	5.78632	5.09035	5.56873	4.62822	2.871	3.59699	3.08582	2.63578	2.57635	2.60509	3.74016	1.83569	3.1108	6.81439	1.11668	4.68678	6.1277	2.10076	4.83182	5.213	1.33647	6.39703	4.88135	2.1276	9.28391	0.190117
TCGA-AP-A0LH	10.9666	2.26222	4.62636	6.99181	4.73461	2.74165	2.1719	3.98714	3.37531	4.81867	5.88145	1.61678	5.89172	3.74955	3.63171	3.27166	4.07324	3.89211	9.16915	1.21507	4.67838	8.30475	4.98853	10.9084	4.48844	3.98929	7.10322	2.84948	2.58942	5.08914	1.83784	2.10956	3.4624	2.38636	2.47444	2.52125	7.00289	2.5517	2.57852	6.6498	3.85189	4.83872	7.21152	4.10223	2.57927	6.7369	2.8876	3.70634	0.284107
TCGA-AP-A0LI	0.099989	2.60774	5.74724	0	3.43331	4.7269	0.942161	4.23591	2.95132	0.245734	3.11677	4.06324	1.20541	4.30529	2.69116	0.635199	2.62158	2.246	0	2.7224	1.97608	32.8552	8.52649	12.8436	15.3331	9.96512	8.0935	8.74607	5.22365	4.2814	9.40133	5.55197	4.75467	15.587	7.08874	6.32808	9.2302	6.75971	7.43575	0.666288	3.83961	4.859	0.980651	4.08253	4.96283	0.826061	5.33372	4.28221	0.0221241
TCGA-AP-A0LJ	5.84921	4.77567	2.66963	8.56601	3.90125	4.96905	3.47525	3.81957	5.37391	6.61924	5.05893	7.12481	3.16155	3.89736	2.22776	3.44503	2.48397	1.22505	5.86928	5.71401	5.16331	9.95508	5.696	7.84341	5.52747	5.46163	4.7672	3.40909	3.25536	3.6142	2.54887	2.29662	2.67945	4.79503	2.15719	2.18753	11.3596	2.10506	2.68033	4.93358	2.55599	2.92553	6.3586	5.93974	5.08323	5.38231	2.93616	3.70743	0.150135
TCGA-AP-A0LL	0	2.81061	1.05436	0	2.87765	7.55735	0	1.34052	6.23958	0	4.34002	3.33504	0	2.90124	2.04119	0	4.56854	4.72686	0	4.59218	2.33592	39.8674	4.62725	8.98201	20.4956	3.77832	5.18476	13.3058	2.53571	3.64232	9.04264	1.69689	3.02516	12.1988	1.85137	2.71818	5.02484	1.77131	1.97077	0.0648688	1.6941	3.17518	0	2.09783	1.97068	0	2.09103	3.16502	0
TCGA-AP-A0LM	6.93887	2.29249	3.75268	2.33767	3.85381	4.56349	3.10895	4.85554	5.0076	0.640096	6.36971	3.8784	1.1088	2.00279	6.91529	0.0103084	2.95637	3.56708	0.968955	1.34972	7.45666	15.9598	5.76697	5.69024	8.41446	6.24385	2.92794	5.2782	4.70375	1.67044	5.20367	3.90128	1.58593	11.9519	3.80704	1.57416	13.3534	3.97937	2.77846	6.15609	4.32436	1.99122	14.2508	4.85263	3.26728	4.11987	7.39295	6.96946	0.0633889
TCGA-AP-A0LN	10.148	3.97882	4.96707	6.53088	0.226448	5.93283	6.16254	3.38597	8.04449	5.83827	1.12548	3.82079	5.94459	3.40381	3.17683	0.868725	3.07759	2.12822	1.73731	3.27209	1.82862	9.90458	3.67025	8.60698	4.76715	3.56943	4.97027	2.89493	1.92926	4.03803	3.95023	0.982079	4.30419	5.24225	1.50733	3.32802	8.39972	1.05359	2.80211	7.39625	1.00353	3.74685	12.2804	1.30566	6.41724	4.77969	1.57813	3.44828	0.208986
TCGA-AP-A0LO	3.86886	2.56119	3.87329	5.02536	1.7694	3.09895	8.23943	6.2632	5.65713	5.49501	3.30319	1.33359	5.11761	4.23082	4.86541	3.56543	5.31692	0.939746	1.46465	3.36534	1.48899	11.5133	5.57039	10.1736	5.76828	5.06085	5.65412	2.89238	2.77128	3.90104	2.63613	1.55053	3.21838	6.98486	1.3723	2.56689	6.883	1.70787	3.39334	6.83463	2.71078	5.99016	5.94331	2.13065	3.47516	9.38223	1.84454	3.7154	0.251939
TCGA-AP-A0LP	3.22342	4.04872	1.04161	0.301453	4.2513	5.34418	6.13639	2.04768	2.67875	3.63516	5.2064	5.5528	5.46297	2.12294	4.81492	0	3.43456	1.13066	3.13187	3.39667	0.351632	25.625	6.91676	11.4043	5.04098	6.17452	6.17569	3.28365	4.40892	3.8246	3.00887	2.66662	3.01384	6.08561	3.92719	2.54001	9.44147	4.30609	3.36266	5.52495	2.21518	3.3779	11.0703	2.73364	3.20842	8.2191	4.17973	4.85908	0.152363
TCGA-AP-A0LQ	5.59806	4.14001	4.87492	9.87808	4.08749	2.07632	5.37012	2.41477	2.61436	5.49298	3.86391	10.3077	4.88083	1.62247	1.44975	5.35272	5.89532	3.54966	0.831878	5.17503	1.85133	8.73366	5.33431	8.90396	4.91298	4.15028	5.47374	2.97272	2.74673	4.27961	2.7528	2.01514	4.48332	6.56409	2.58565	3.62676	7.13386	3.51696	3.12316	6.55446	2.66909	2.2323	7.58583	4.97653	1.45301	3.8126	4.41168	3.0109	0.215173
TCGA-AP-A0LS	0	6.0398	4.06767	0	4.05232	4.23707	0	4.7005	3.27915	0	2.28347	4.77298	0	2.96164	9.13759	0	1.40619	4.61151	0	2.54336	5.61335	59.4535	7.20701	6.56388	22.2721	6.78919	3.86038	10.299	4.32823	3.00114	5.09777	3.29928	2.67921	2.16668	3.66871	2.33911	0.711011	3.10879	1.90547	0	4.21981	1.76408	0	3.27775	3.71412	0	3.12319	3.0467	0
TCGA-AP-A0LT	0	2.90869	3.40562	0	5.32944	7.32955	0	1.33984	4.28349	0	5.44557	3.37081	0	6.77094	4.3819	0	6.03124	3.92269	0	4.07416	1.40369	33.4105	4.23004	9.62263	15.364	3.65292	5.94763	7.7927	2.5359	5.34225	12.4847	2.27505	4.26528	8.6065	3.56813	3.83782	10.4826	3.99056	3.26668	7.63133	4.36637	3.30663	4.2277	2.48275	4.02125	0	4.73159	7.10993	0.00640655
TCGA-AP-A0LV	3.06411	3.40118	5.54401	3.53124	3.26999	3.98662	5.69941	2.89315	2.27297	2.70071	3.4041	6.92608	2.90815	2.19324	5.48337	2.0355	1.47685	4.33073	3.39198	2.18928	4.87543	12.831	5.2559	10.0892	6.18636	4.36818	6.15795	3.14125	2.60432	4.2518	3.36433	2.02051	3.85779	7.88115	1.59733	2.04607	8.49393	2.21147	2.80116	7.51636	1.7319	3.74226	7.85495	1.56755	6.45019	10.8724	2.25744	4.37914	0.192172
TCGA-AP-A1DH	6.09131	3.84968	1.57049	1.49033	4.16464	1.31155	3.82783	1.54493	1.9679	2.16243	5.23393	2.91934	0.150056	3.72899	0.801192	0.506527	6.39133	0.420757	4.17753	3.16421	3.51621	11.8233	4.52122	5.9346	6.23366	4.12743	4.01597	4.02458	2.70938	3.09395	4.57383	2.18694	2.98987	6.38608	1.74405	2.45346	6.95205	1.79894	2.67817	5.70997	1.33692	2.79076	8.05195	2.87692	2.39836	6.59184	2.90755	3.27072	0.189482
TCGA-AP-A1DK	2.91812	6.42162	4.55284	1.80775	5.02857	5.47722	1.05144	3.37732	7.37163	0.326597	5.39096	3.80409	0	2.61737	2.97114	1.54504	5.74949	3.63793	0.966698	2.79331	2.95141	17.3696	6.23677	7.41422	9.12239	6.48414	5.35688	5.12381	4.07644	3.8273	5.69078	3.18577	3.42294	11.5286	3.42201	2.53689	9.23021	4.06203	3.2448	15.3219	5.40168	3.25509	8.16494	5.88332	5.46067	9.83216	2.03614	6.39174	0.0712132
TCGA-AP-A1DM	3.23796	5.90463	3.27741	4.53202	1.11709	4.55912	3.86199	4.97916	1.34632	0	1.78203	1.76822	0.620181	3.71223	3.52824	0	2.51369	2.4586	0	4.68253	3.33891	19.6294	11.5279	10.0734	8.88347	9.18958	5.53593	5.10076	4.93811	3.52938	8.44856	4.43516	2.40587	12.8801	7.44639	3.72013	9.38685	4.67578	6.70113	10.944	5.38565	5.36564	2.69152	5.2607	6.32285	9.78315	3.63496	3.72099	0.103774
TCGA-AP-A1DO	0.757395	3.70531	5.01379	0.425064	6.88272	1.16867	0	2.00229	3.10752	0	2.26791	6.7248	0	1.34546	2.56725	0	2.04033	2.03854	0	2.84152	1.42105	28.2616	6.94903	13.5222	15.3282	7.3571	9.53928	7.48669	4.12857	4.27374	12.1492	5.03923	4.59703	18.9533	6.20149	3.22992	6.0238	12.0591	7.6329	4.08399	5.19247	4.16318	2.17367	5.07095	7.80318	4.35697	3.38989	4.11898	0.0247096
TCGA-AP-A1DP	7.47583	2.93558	6.30121	2.8706	3.35415	2.71604	6.06383	3.48638	1.23647	2.7902	4.00851	3.2852	2.41203	4.74742	4.67104	4.08498	3.67938	4.71779	2.94106	2.77105	3.66344	5.83474	5.58863	9.33155	3.1123	4.25479	4.91573	1.65177	2.6499	3.14468	1.50884	1.5257	2.85405	1.29225	2.62056	1.71645	2.7485	1.88761	1.70287	3.73536	1.99458	1.1519	2.45618	2.39742	3.72034	3.81833	1.90129	4.31082	0.342975
TCGA-AP-A1DQ	4.92165	6.12345	1.68397	5.84705	6.70406	6.74037	4.9845	4.71846	4.05964	2.93453	3.20151	2.98831	1.39163	2.98205	3.94251	5.4649	2.06272	7.92792	4.20251	3.45592	3.25931	6.17943	3.86216	6.14344	3.54896	4.96039	3.54749	2.90407	4.23966	1.9991	3.4803	3.73766	1.64539	3.69121	5.04746	0.831659	6.32399	4.61491	1.25588	5.65276	4.59419	1.35404	5.53439	3.94871	1.03433	8.23949	6.32266	1.44858	0.157646
TCGA-AP-A1DR	2.16535	1.46028	4.89471	3.91376	4.52034	7.22429	1.43572	3.45137	2.37426	4.8615	2.08745	2.05272	3.44912	3.12307	4.12644	1.37622	1.44439	4.06765	4.24775	3.47866	2.85243	5.15544	4.03753	9.27013	2.86881	3.92688	6.62561	1.80924	2.88029	4.38824	1.04237	1.41393	2.89526	1.07343	1.6837	2.58924	1.16139	1.22789	2.58538	3.76586	0.898825	2.72115	2.83935	2.38539	7.09062	2.26828	1.6891	3.79784	0.408301
TCGA-AP-A1DV	4.25026	2.27501	4.30686	4.67556	2.04407	4.02198	2.65423	3.01871	8.88502	1.0051	5.10129	2.88083	0.0396665	3.54328	8.17931	0.968779	3.45371	7.88044	3.02828	3.15941	7.14396	15.3329	6.20639	5.67886	7.71508	6.56643	3.4016	4.06419	4.88506	2.93692	4.43224	4.34838	2.45897	5.91968	3.28442	2.43825	9.40749	3.53091	1.89368	11.267	3.68443	2.32517	9.71565	3.02917	6.21881	13.2844	4.62395	3.90802	0.0789901
TCGA-AP-A1E0	0.460652	6.43163	5.86129	3.21296	2.56978	4.96155	3.98824	4.046	3.79161	0.446814	2.39507	4.94541	3.22247	4.41629	2.51802	0	1.93868	3.04622	0	0.808782	1.51828	22.2253	9.16391	7.58394	10.8809	9.45068	4.13875	5.29284	5.54621	2.59002	5.86627	5.6718	2.90343	13.3739	5.94024	3.29084	9.96599	3.76545	1.9485	8.45735	3.43474	2.54005	5.99076	4.03928	8.19661	6.61561	3.3463	5.74751	0.0599063
TCGA-AP-A1E1	5.56848	1.81576	4.09014	6.14599	3.56349	4.70662	2.15989	2.74377	4.89398	6.21993	4.41023	1.89979	2.11334	5.3666	3.9019	7.21841	2.22731	4.77596	6.10035	2.20759	2.97316	10.2393	5.70547	9.77455	5.58333	4.36062	5.75301	3.26427	2.801	4.19346	3.06881	2.21536	3.31229	3.75639	1.55107	2.10006	3.31321	1.8892	2.56678	4.91828	1.7297	2.42083	4.46721	2.6163	2.82784	4.41674	3.52012	1.64428	0.183527
TCGA-AP-A1E3	3.98628	3.97998	7.75973	1.72651	1.83551	5.18938	2.8058	4.23958	3.38567	4.45221	4.33729	4.16713	2.41056	3.37908	0.0780369	1.88731	4.81736	3.36569	3.0407	3.06778	2.87979	6.80672	5.27183	7.83208	3.67456	4.76597	5.62306	2.24002	3.12721	4.05377	1.66149	2.22943	2.90264	2.12733	1.44746	1.81711	2.42807	2.41463	2.47867	3.07065	3.36174	3.77897	3.60414	2.91821	2.56648	2.50762	3.59974	2.60581	0.301313
TCGA-AP-A1E4	3.78575	1.36237	2.04311	3.92149	1.85305	5.83276	4.6381	4.54281	1.44348	6.86773	2.224	0.894973	4.23886	2.63853	3.93252	3.16028	3.4669	0.858852	3.53945	4.93705	2.68108	10.5912	2.96626	7.91285	4.92286	2.28804	5.81265	2.32252	1.77453	4.57256	2.96471	1.32208	3.84915	3.19783	1.10694	3.73698	3.0349	1.48499	2.43285	8.18241	2.08789	2.64209	9.2985	1.60206	4.45429	5.03983	1.53535	2.57424	0.2387
TCGA-AP-A3K1	0	4.90794	6.82725	0	2.3654	4.82024	0	4.32707	8.29012	0	3.00484	3.47471	0	4.32631	1.79365	0	5.5468	1.88524	0	2.66626	3.44114	37.8221	4.36116	10.6066	18.7393	4.16766	7.37726	8.54532	2.73382	4.61407	7.1798	2.56486	3.38544	7.77783	2.7579	1.81795	6.94888	2.90859	2.33858	6.96421	4.37867	3.14877	6.02258	3.8081	3.56636	0	5.09572	4.11902	0.00285325
TCGA-AP-A5FX	2.87788	2.3868	3.46335	4.79574	8.12635	5.95115	5.4844	5.3228	5.21599	7.1824	4.63759	3.05141	4.14799	0.498428	2.06218	3.19654	3.28623	4.2669	2.23656	3.36326	1.38837	8.54505	4.9308	8.66072	5.80265	6.18185	5.89478	3.08879	4.98664	3.44883	2.11197	3.55251	2.71681	3.08846	3.54417	2.65972	2.64538	3.54255	4.28015	3.19312	6.64245	3.52891	8.80496	7.59986	5.07877	6.01326	4.1275	5.22422	0.277227
TCGA-AW-A1PO	2.81877	3.87239	7.4776	6.93476	3.19687	3.47642	6.64623	4.9629	0.889319	2.32219	4.62382	2.91637	6.21472	1.99788	2.16459	0.875022	1.90427	3.18629	5.98729	1.72093	2.61757	9.76209	10.9812	17.4081	3.99703	5.65455	6.90837	2.31676	3.10336	4.10622	5.17748	5.36748	3.18083	4.35888	5.56915	2.68327	4.95178	6.58473	4.0111	5.26062	6.70248	5.34835	5.63337	6.50905	4.95389	5.51515	7.90133	3.13922	0.274597
TCGA-AX-A05S	2.66362	2.34497	2.23947	4.80413	3.28339	2.52978	4.79136	3.16716	4.76479	2.83477	3.1189	3.89891	2.9179	3.67213	2.60904	6.63627	1.8019	1.63615	3.06609	3.73205	2.47599	5.88984	22.4286	10.8276	2.62291	10.0734	5.04702	1.45175	3.73733	2.43286	1.4127	4.83943	2.21788	1.61918	4.05755	2.51404	2.04475	4.06134	5.64426	2.08559	4.11585	5.30031	2.32446	4.39616	4.43341	2.64553	2.28634	5.69681	0.504485
TCGA-AX-A05T	3.32814	3.51602	4.83044	2.03354	4.54878	7.88634	1.98946	4.25838	2.50077	1.96638	2.94415	4.18469	2.03252	4.93693	2.43326	4.57788	1.45381	4.95639	3.37668	4.21297	3.99874	5.84037	9.59738	10.1884	2.58227	5.11917	5.2813	1.5486	3.2816	3.67684	1.59146	2.23915	2.89353	1.68264	3.92359	2.31279	1.94843	3.35584	2.92823	2.28509	4.22581	3.87989	3.14341	4.76549	2.34007	1.63331	3.23959	3.11288	0.39923
TCGA-AX-A05U	2.66202	4.18539	5.62351	1.21584	1.30394	5.17544	2.96366	3.45447	6.60479	1.38131	2.31794	6.27889	2.57732	0.834206	4.13461	2.4419	1.09109	0.933211	0.944529	2.68032	3.50107	3.56795	21.9206	6.9374	1.79523	11.7616	4.2689	1.20979	6.20403	2.40642	1.11882	7.66457	2.40932	1.19405	7.80579	4.36562	1.32658	4.11916	2.49013	1.45599	5.48825	4.88856	1.82549	5.79698	2.03464	1.57336	7.63547	3.17322	0.467585
TCGA-AX-A05W	5.64643	1.92815	3.83949	3.65018	3.89996	1.52639	5.47527	3.08048	2.04567	4.23904	2.50272	5.14192	7.72623	1.69018	2.72724	7.72882	2.87435	4.10359	3.83693	1.39459	5.613	4.30751	26.7547	11.8028	2.0121	11.4684	5.1809	0.989466	5.14593	2.76135	1.14327	5.06496	1.86304	1.27241	5.91001	2.50705	1.58538	5.2356	4.19042	1.79015	5.85503	4.69429	3.01003	3.97434	6.23337	2.17442	2.57876	5.37507	0.558721
TCGA-AX-A05Y	3.48048	4.43488	4.8262	5.11549	5.03235	3.44277	5.99476	4.14038	3.94532	1.92825	2.45524	3.51891	4.25348	4.65051	4.3577	7.1759	2.01157	3.2156	2.27159	1.81014	4.70509	4.82468	13.072	11.5693	2.2213	7.31598	5.74912	1.36157	4.1014	4.07271	1.16035	4.08146	3.42288	1.3053	5.19791	3.35597	1.55696	4.70195	4.47386	2.10015	5.35626	3.96492	3.95246	5.28168	3.41181	2.03711	2.34761	3.61048	0.475397
TCGA-AX-A05Z	4.63962	3.05905	2.61704	3.70054	4.80265	4.59695	3.13543	3.29823	4.0235	2.12588	2.5661	2.94611	3.81202	2.39281	2.90774	1.4172	2.21411	5.34131	5.7681	1.6241	2.85785	4.13931	14.5139	6.4618	2.63125	9.72398	3.48446	2.39431	7.84106	2.87279	2.12561	7.33102	3.38221	2.23525	7.12693	3.14242	2.35192	6.9012	3.42615	1.79574	6.80975	3.65468	2.59613	5.93995	2.20518	3.03486	6.62313	3.83705	0.36704
TCGA-AX-A060	5.19185	3.08256	1.32508	3.13209	5.19308	4.1471	4.13358	5.27961	4.29252	4.85223	4.2683	4.65116	6.49332	4.32587	4.27785	2.67937	1.25274	4.57412	3.08263	3.02008	2.80007	6.9284	20.7144	8.16622	4.11938	7.91455	3.65531	2.70938	3.85807	1.97436	2.15983	3.39984	2.02292	2.67644	3.22619	2.29268	3.42103	3.97457	2.19617	4.12774	4.02421	3.68575	3.72137	4.65699	2.79293	4.16552	3.9351	3.29794	0.336054
TCGA-AX-A062	3.58036	0.916635	1.95764	4.05814	1.46072	2.22275	6.01726	1.82727	2.11904	3.08351	1.54322	5.21954	3.24112	1.74495	4.23841	3.59579	1.44064	2.15099	6.6993	0.954879	1.91863	6.375	28.0671	11.4768	2.97205	10.5179	4.80381	1.27548	4.57851	2.30949	1.46834	6.76211	2.17252	1.55328	5.43849	2.03304	2.37272	7.73165	2.48284	2.64638	7.44336	2.65398	2.8958	5.29426	2.93776	3.00289	4.50609	3.5054	0.410358
TCGA-AX-A063	4.58889	4.23719	6.40043	4.52237	2.93347	3.09109	1.84865	2.96009	4.02513	4.04286	2.14981	5.24715	3.87131	2.21011	4.13123	4.73524	2.68885	3.42548	4.98914	2.89155	4.9001	5.61832	18.1288	9.59117	2.76336	9.85632	4.88537	1.98001	5.6905	3.02461	1.76563	4.91734	2.36969	1.88701	5.00806	2.62801	2.56843	7.39431	3.01633	2.85087	4.64594	4.16439	4.37127	4.21918	2.69491	4.05352	3.48949	0.925538	0.39011
TCGA-AX-A064	4.95501	3.79592	4.99318	3.07599	3.95979	7.01801	4.71311	1.91073	3.70848	3.76938	5.27981	1.55091	4.70982	2.81835	3.63868	5.633	1.59546	2.02612	3.34316	3.36656	2.33383	7.14354	18.8191	10.7933	3.32543	9.02038	5.2654	1.90254	4.50193	3.50394	1.78786	4.18338	3.4108	1.78269	5.00873	4.92553	3.25929	5.97115	6.84561	3.41594	4.33484	6.80584	3.5819	6.53507	4.50542	3.874	3.80549	4.34483	0.438349
TCGA-AX-A06B	2.64774	2.61239	7.58124	3.20726	1.03609	4.6528	2.07305	2.15955	3.52798	3.29629	3.61222	2.54763	4.30503	2.05457	2.14145	3.92524	1.46471	3.60287	5.14673	1.95354	4.15822	4.49568	25.3562	9.92673	2.0606	11.0278	5.22008	1.10284	4.67384	2.79394	0.821854	3.60506	2.42835	1.14136	3.44777	3.31672	1.37764	3.23855	3.79486	1.72845	5.63067	5.48171	2.75836	2.97587	2.30236	3.58831	4.39879	4.45326	0.562117
TCGA-AX-A06D	4.58801	4.26434	7.38734	7.9409	2.97413	3.22007	1.94188	2.08577	2.11557	4.89832	1.85624	1.75294	4.14608	1.72374	3.53613	3.87569	1.30757	3.99649	3.17654	0.978489	2.66464	9.91656	20.6152	10.1941	5.04789	10.5889	5.57698	3.0029	6.02109	3.45326	2.48818	5.35301	3.17058	4.23994	7.48392	4.23574	5.64748	6.77402	5.27081	3.44328	5.53766	5.26259	5.05781	5.22497	4.56146	5.84411	5.66305	3.80943	0.332029
TCGA-AX-A06F	3.80258	1.80009	3.04738	5.42873	1.11333	2.63495	4.2256	2.10808	4.15782	3.10932	0.979815	4.29435	2.12355	1.29127	1.60973	1.31094	0.918335	2.3747	2.28109	0.643755	3.44336	15.3213	13.5937	11.776	7.34235	8.52612	7.3899	3.69867	4.41259	4.107	5.39287	6.98489	3.28216	6.98731	5.76097	5.46271	7.83273	4.4945	3.48987	6.43888	5.04442	4.362	3.68309	4.32347	7.06861	5.19252	2.16888	4.07419	0.131213
TCGA-AX-A06L	2.50283	3.04508	4.98502	5.13002	2.96301	4.39233	4.45735	2.08259	4.09258	4.10155	1.31227	3.70066	6.32669	3.20917	5.8414	5.6307	1.88426	3.9106	5.19514	2.04323	4.53299	3.56981	21.7198	8.59513	2.08562	11.2711	5.09667	1.45837	6.91422	3.30398	1.64645	6.90409	2.57019	2.05973	6.08144	2.53343	2.44323	5.87561	3.25201	2.2691	5.34875	3.14235	4.00384	3.94463	3.65305	3.57463	3.50485	4.27412	0.4032
TCGA-AX-A0IU	2.91862	3.45745	5.16861	3.94189	2.26965	4.41295	3.08498	2.1255	5.20134	3.84162	2.01941	7.39929	2.50149	2.50338	4.71232	2.14454	0.707714	6.72556	3.07818	0.98304	5.14037	5.91374	19.5401	5.97523	3.79448	11.4366	3.60523	3.05347	7.55673	1.86414	3.07856	6.80297	1.7538	2.66126	6.7968	1.91531	2.61803	6.87801	1.12939	3.18735	6.67356	1.70275	3.8818	5.49513	2.80082	4.70835	6.03684	2.17608	0.394244
TCGA-AX-A0IW	6.84048	3.36477	3.03287	5.22107	3.42717	5.84284	7.65775	3.0221	3.51529	2.5314	2.41279	4.01422	3.33015	3.79531	5.27624	2.14092	1.95347	3.53872	2.23244	1.61539	2.68582	10.2373	25.511	9.76438	6.3245	9.54607	5.33168	4.26446	4.76212	3.0613	3.62555	6.04027	3.28048	3.72849	4.26256	2.01837	4.50547	4.35577	2.47414	6.55789	3.77288	2.41364	7.08328	4.93425	2.8008	7.09303	2.69991	3.55719	0.213695
TCGA-AX-A0IZ	4.6972	3.56698	6.68753	2.90397	5.80654	5.80015	4.5133	2.67913	3.99004	5.55765	4.73304	4.66585	5.44689	3.29737	3.8414	2.6735	2.58903	3.25403	4.61061	2.08178	2.19686	8.5121	9.79137	11.1204	4.5887	6.30737	4.93999	2.93075	4.25777	3.19747	2.14336	3.55187	3.02245	5.09209	5.80003	3.39289	7.06542	6.79427	3.58032	5.62387	6.40309	5.70564	6.24416	8.18986	6.39882	4.40007	6.35181	5.37839	0.237361
TCGA-AX-A0J0	2.21006	4.48563	6.38286	4.6888	2.77971	3.88689	3.15662	2.8941	3.57586	1.92485	2.05844	2.62659	2.99807	3.18828	4.11568	3.30168	2.17095	6.29775	4.04084	4.05628	1.08919	5.41446	8.25238	9.72377	2.58076	5.66105	6.08475	1.69119	4.51143	4.25929	1.56701	3.15367	3.45748	1.62416	3.90898	2.4753	1.80282	4.01791	3.3851	2.96783	2.96081	5.26944	2.6024	4.77011	4.6455	3.25198	4.16914	6.56313	0.391799
TCGA-AX-A0J1	1.77171	4.10993	0.431578	2.53847	2.79093	1.11586	1.92092	1.91664	2.15763	1.5469	3.2094	7.76873	3.01681	3.14372	2.79129	8.76685	3.20209	5.14345	6.20934	3.61507	0.948439	2.79402	22.1904	10.088	1.40144	10.2849	5.39596	0.83676	3.91644	3.3333	0.723686	4.25365	1.54922	0.754064	4.47878	6.14682	0.636158	3.36889	2.10926	1.21684	3.42301	2.27929	1.3917	2.74358	1.27554	2.53521	2.63097	2.42947	0.627317
TCGA-AX-A1C4	4.66498	2.39609	2.13224	4.48108	1.1716	4.39348	4.20741	2.37481	2.61559	2.04612	3.52742	1.61095	2.25911	1.24743	4.35184	5.13806	1.33331	3.42153	1.7323	1.07373	1.45104	11.4722	10.9331	9.43608	4.56162	3.87849	4.36138	2.97302	1.92745	3.0355	2.78321	2.43995	3.22125	5.24867	1.10008	4.60214	5.08287	1.10324	5.25304	6.08829	1.79607	6.47426	4.8669	2.5201	4.96197	4.69532	0.736702	4.76355	0.0807451
TCGA-AX-A1C5	3.07605	4.93959	3.78667	2.04788	4.31942	5.60816	5.46899	1.3358	3.58731	4.29049	2.48963	1.53361	2.50938	1.74712	2.25682	1.89312	3.08681	3.92839	3.93254	6.88408	4.32106	13.4655	11.9877	15.1347	5.88613	6.08905	6.73394	2.57561	3.23227	3.16048	3.23764	2.60484	2.18008	5.97942	3.99558	3.83646	4.36953	3.912	4.91514	7.41609	4.97102	5.5787	4.33204	3.36757	6.06463	6.21662	3.70548	5.88559	0.235504
TCGA-AX-A1C7	4.71665	1.77755	3.60497	2.87954	7.24016	3.69109	1.78949	3.3056	5.68235	1.57507	5.02326	3.50725	1.04213	0.99289	3.70077	1.14074	1.00364	2.39224	0	2.72818	2.24374	21.933	16.6508	10.8986	9.62249	7.71941	5.62827	4.91846	4.79071	2.72423	5.31085	3.34982	3.89	12.2889	4.99771	3.40555	7.8841	4.67642	5.46965	12.958	5.41308	4.59998	6.56678	3.75601	4.65263	5.37383	3.19898	3.12555	0.0516495
TCGA-AX-A1C8	7.19743	5.35098	2.5535	4.58408	3.29897	4.81325	1.56934	4.62459	2.91616	5.64408	4.34299	2.72068	6.60427	3.37439	1.60861	5.50256	4.20675	5.25149	0.96643	4.63476	0.470058	9.89559	8.1857	16.2848	4.64577	5.16439	7.88058	2.71032	2.69867	3.87879	2.92842	3.43275	3.20488	3.91128	4.81745	7.08626	6.24453	3.8698	9.33843	8.58652	5.14481	6.42233	4.99022	7.55095	4.10614	5.70937	5.35008	2.87762	0.256614
TCGA-AX-A1C9	3.62459	2.77686	3.28188	3.08631	4.57615	4.22069	5.50711	2.23945	3.35319	2.40588	1.85807	2.54705	4.61701	2.57733	3.39833	4.25572	2.36451	1.64862	4.77049	2.39579	4.30758	7.86065	24.0402	8.93463	3.57118	10.9892	4.7915	1.84801	5.22419	2.7417	1.53877	4.05354	3.20112	2.38772	2.7406	3.00117	1.94205	4.7449	4.04886	2.63162	3.30608	4.63316	4.69735	3.27911	5.73367	4.89223	4.81793	5.4214	0.337087
TCGA-AX-A1CA	2.38605	2.05811	2.8653	2.32253	1.99915	6.69335	4.69619	2.12738	3.23848	4.3755	2.63662	3.50088	2.44143	0.744889	3.03862	3.82866	0.996151	4.64113	5.3325	1.17546	3.6964	10.2553	31.9788	9.54472	4.79005	13.6186	6.23083	2.47801	5.22311	3.39472	2.40263	7.19382	2.48976	2.30729	8.50924	4.47036	3.40513	5.97098	1.79528	3.97142	2.97589	8.39972	2.82209	4.13505	3.24017	5.06461	1.09462	4.70364	0.332843
TCGA-AX-A1CC	6.98369	4.41174	3.38596	5.10439	3.26654	3.95223	5.71576	3.47172	4.76216	1.81244	2.99645	3.41515	3.34231	2.71265	2.40704	2.83381	2.0399	3.91423	3.92171	1.8215	2.35705	9.95615	14.8704	11.6006	4.17255	8.72561	6.25108	2.36765	4.03532	2.95221	1.71119	5.57986	2.95629	3.07127	3.82011	4.45162	3.65094	4.43593	3.49615	2.75266	4.83106	6.78096	3.07777	3.86371	5.55836	4.55965	4.36348	5.3237	0.253446
TCGA-AX-A1CE	6.61905	3.74762	6.6037	3.71642	4.26215	4.89181	5.19169	1.6181	2.54937	2.79175	2.45064	2.17747	2.86871	4.22133	1.87789	2.79134	1.2606	4.1978	4.12217	1.52204	1.7007	9.21185	13.2231	14.9045	4.95952	8.63636	7.48648	2.87314	4.87408	3.32442	2.85397	6.06559	3.55361	4.43171	7.82925	6.1089	4.90149	6.64046	4.35441	6.94084	6.26589	5.57514	6.36998	4.7914	5.91374	5.66471	5.05313	4.78102	0.322167
TCGA-AX-A1CF	4.41734	3.28764	2.60511	4.32063	5.2066	3.43231	3.05256	4.36498	3.99704	4.88042	2.87081	2.67591	4.70446	5.1189	4.84714	2.88321	1.61996	2.4937	2.56911	5.06557	4.03883	9.05929	9.63317	12.3102	4.08557	5.36587	5.06631	2.00157	2.65033	2.77761	3.24787	2.09572	3.34306	3.52449	2.44251	3.24877	3.79971	2.43883	3.71849	4.49249	3.02447	2.6241	5.22168	2.67371	3.22128	4.70475	2.23103	4.16396	0.296326
TCGA-AX-A1CI	2.85652	5.10085	5.16197	2.31632	3.22387	3.83585	3.33036	4.52644	5.61222	3.18581	4.68334	1.87619	6.00012	5.14037	5.12611	3.07762	5.84145	1.23179	2.56444	4.47833	2.51277	5.67457	5.78882	10.1498	3.13183	4.37613	6.36598	1.93664	3.14602	4.76666	1.76044	2.20029	3.78687	1.8841	2.42405	2.99817	2.32133	3.49332	2.72619	2.31973	3.15627	3.37423	2.8985	4.84149	4.0659	3.3187	4.8618	4.60479	0.418634
TCGA-AX-A1CJ	6.57783	6.68518	4.23111	3.5505	5.2774	3.94483	4.19661	2.68157	4.92737	1.24456	1.71513	2.53658	3.27231	3.15008	4.52739	2.36411	3.00588	4.78725	0.737486	1.25425	2.6909	14.3643	11.9354	10.9777	8.13443	7.47354	6.61119	4.84966	4.93047	4.20651	4.91946	5.40262	3.41029	9.07404	5.89643	2.77151	9.05635	7.65148	2.83044	9.28386	8.64528	2.65177	4.90483	5.7008	5.82751	9.34312	7.42276	3.86846	0.106419
TCGA-AX-A1CK	2.42414	3.77961	3.59949	4.35841	3.71237	2.38894	2.02338	2.84261	3.29729	3.01088	3.37891	3.32216	1.64751	2.16054	2.27613	2.75947	3.52997	3.37494	3.8548	3.29888	4.63094	6.70138	7.66849	10.281	3.49493	4.84049	6.3858	2.16496	3.0203	4.50653	2.33622	2.11498	3.46107	2.61699	3.44416	2.86072	2.81323	2.36876	2.99347	3.08342	3.80169	2.71829	2.4714	2.73962	3.62957	3.61625	5.2495	3.37116	0.323068
TCGA-AX-A1CN	5.04456	6.38181	2.94844	4.34857	2.64753	4.22618	4.95132	2.37488	2.65945	4.09551	3.4141	1.60664	5.31598	3.0462	2.98949	4.88372	3.27502	3.52471	3.08293	2.71769	3.51183	4.08265	15.5873	11.0964	2.14083	7.73607	4.78205	1.49005	4.99611	2.32778	1.40833	5.30281	1.58438	1.96555	4.85904	2.17828	1.72537	4.63015	1.92806	3.34815	6.59413	1.87398	1.9395	5.74668	2.23778	4.55543	3.32597	4.82178	0.392568
TCGA-AX-A1CP	5.19166	1.16982	6.39745	4.39039	2.83723	3.85868	4.18044	3.25936	1.48262	3.43299	1.49719	5.29006	3.28724	2.28831	2.809	4.45623	1.27643	4.51386	2.90946	0.662203	2.40057	8.98167	31.1904	8.20096	4.00411	13.341	4.39005	1.85186	4.98438	2.43052	1.72712	4.87901	2.92939	2.46887	5.4253	5.44574	3.36282	6.42929	8.6617	3.28185	3.95166	10.7583	2.11518	3.71296	8.78244	6.46135	2.0232	5.56425	0.390159
TCGA-AX-A2IN	7.36633	3.63698	6.47172	1.11499	2.5306	4.67161	2.49263	2.10362	2.69356	2.09587	4.48615	2.78021	2.07671	1.40039	3.54995	1.01264	2.62204	6.22284	2.80933	1.13889	6.08269	5.05416	14.7221	9.28126	3.5463	9.62359	4.67117	3.09143	7.50518	3.09786	2.90688	6.18512	3.01121	3.13598	7.42861	2.90572	2.83758	3.4443	2.46188	6.43227	6.42666	2.71056	6.87459	3.31031	2.2306	2.807	3.02301	2.97061	0.293133
TCGA-AX-A2IO	2.90826	3.98225	0.939293	2.1667	2.21235	1.83188	5.37341	3.61655	5.30918	2.80704	1.75728	1.36399	1.30064	1.85741	1.68638	2.29832	1.45388	3.91444	2.91359	0.731221	3.05935	4.89001	20.4394	9.83308	2.35676	9.09797	5.0805	1.23588	4.48086	2.61943	1.3279	4.03238	2.27351	1.39999	3.10953	2.2126	1.78452	3.59796	2.25047	1.21066	5.77079	1.6812	1.19577	3.14621	1.57811	1.84737	4.80821	2.41604	0.504401
TCGA-B5-A0JN	5.70495	2.8086	2.93966	3.91586	0.80471	4.10115	3.59588	3.18566	2.2032	4.04993	1.81545	4.17246	2.92504	1.77122	0.594718	5.85948	1.4199	2.22791	3.44243	2.08263	2.00884	10.6519	27.2123	6.56657	5.06936	10.3901	3.4796	3.50404	4.38903	1.87256	4.01365	4.84119	1.58002	3.33703	6.61987	2.30427	6.02724	6.50691	2.55791	2.8832	5.32817	4.7511	4.76605	4.12962	3.4819	5.40111	3.42389	4.40491	0.123258
TCGA-B5-A0JR	3.88754	3.37256	4.94149	4.31563	3.52615	4.2662	3.38633	5.46795	4.87655	5.3644	3.62259	3.73546	4.68789	1.926	3.83146	4.48211	1.85538	3.92034	8.71618	2.46675	0.796654	12.7274	12.783	9.94481	6.38871	7.25698	5.86422	3.61406	4.72235	3.55056	4.27016	6.2275	2.52551	5.85925	7.01568	4.64892	5.68229	5.02715	6.33033	7.99298	5.31129	6.31857	5.67468	7.89528	5.7814	4.36266	1.40585	5.1816	0.126339
TCGA-B5-A0JS	4.01799	4.7319	9.28017	5.23223	3.14568	2.10966	7.23443	1.67619	6.47132	1.08743	5.32052	6.07433	1.34476	2.32597	6.22126	2.19009	1.17071	3.38695	2.00476	1.84432	4.52542	13.9301	18.3054	9.92342	6.55248	9.50901	5.17984	4.14819	6.02518	2.89287	4.92527	5.32397	2.46352	2.71967	5.83538	2.61313	6.3151	9.62631	1.70157	5.37195	4.90556	2.89571	8.61824	4.28806	4.32259	4.35177	5.92131	4.34133	0.123679
TCGA-B5-A0JT	3.04049	2.84508	2.89224	4.09524	2.28602	3.85635	2.44497	4.05375	4.37003	2.96286	3.07164	1.5185	6.17926	2.06497	5.36265	5.73029	3.5915	5.17328	2.1426	1.8186	3.13333	10.9586	13.9383	6.98146	5.95532	7.83949	4.11935	3.86865	4.87303	3.11303	2.40422	3.71984	3.35791	4.81723	7.32638	4.04635	5.7146	3.41223	2.13439	5.31329	6.30703	4.81774	6.26823	4.50319	2.1535	5.70673	4.48331	4.70646	0.108859
TCGA-B5-A0JU	9.03869	3.26271	5.57535	5.25232	3.54348	5.65252	4.32798	1.46524	1.94701	4.55777	3.28033	7.45921	3.40424	4.18907	4.85927	1.07426	5.17403	2.09907	0.975861	6.27863	1.0673	11.4884	3.42258	12.7511	6.08239	2.75227	8.23579	3.3908	2.12974	6.49547	3.36268	2.07296	4.82727	5.79619	3.02591	3.49795	13.2995	5.26536	2.34966	10.2986	4.45069	2.24091	6.32223	3.10481	4.36391	6.89454	4.69549	5.03696	0.264575
TCGA-B5-A0JV	4.99959	4.33037	7.60208	4.29201	2.66144	4.54186	3.44623	2.00579	6.76983	2.05328	3.77738	3.49097	1.681	1.12249	5.77573	3.43757	2.18666	3.47381	4.34293	1.77002	1.69168	11.6078	14.902	8.21255	6.54786	10.0798	4.7083	5.19785	7.19893	3.65952	4.1129	7.03595	4.52289	5.46175	8.2211	3.53026	3.47917	8.59264	2.31148	7.63679	5.31354	2.77496	8.49439	6.26199	5.5307	7.31021	4.84643	4.8516	0.114972
TCGA-B5-A0JX	8.71269	6.18526	1.94151	6.28465	6.35254	6.03004	2.23851	6.77314	4.76911	6.14861	5.4089	1.96391	1.76333	2.79214	1.52651	0.916293	2.92059	3.94716	0.911254	2.32086	4.61713	12.2015	7.64432	16.5321	5.72854	5.54045	7.92153	3.47926	3.10032	3.97901	4.24183	2.81701	2.84025	4.86031	3.7013	6.35377	7.89207	6.65664	3.46313	8.4582	3.20596	5.16422	11.9505	6.96326	8.28174	11.1594	8.18296	3.33665	0.234249
TCGA-B5-A0JY	5.38094	4.25661	7.60723	5.27865	4.72184	4.28945	4.6496	1.85617	3.62929	2.72406	0.928791	4.54591	2.55779	4.28605	2.40183	2.71145	2.58125	2.94293	1.76702	1.51469	2.32339	11.4245	15.585	11.1767	5.59695	8.22507	5.25764	3.28516	4.23195	3.66975	3.84937	5.17096	3.05749	3.21603	5.2216	2.06851	2.69018	5.26262	2.33598	5.61897	6.48933	3.50345	7.86421	4.54831	2.11165	4.88165	2.818	3.2762	0.159618
TCGA-B5-A0JZ	5.50441	1.77371	7.20937	4.50833	4.23436	8.82469	4.27251	3.27734	4.38833	4.68817	4.21019	4.86941	0.744492	2.60131	5.35883	5.05979	1.84899	3.29766	3.53367	5.78713	3.64746	15.2445	11.8168	6.717	7.57402	7.26194	4.08599	4.83111	5.04299	3.10802	4.00251	5.19467	2.54313	6.41517	4.89505	2.45243	7.83922	7.8321	2.66745	4.6241	4.5035	4.79707	8.16935	2.81967	3.11862	3.24442	5.60399	4.85971	0.0813809
TCGA-B5-A0K0	3.46748	11.2459	6.3852	3.21851	5.53309	4.54586	4.90932	4.29861	3.19634	5.62286	3.35961	6.13852	6.36739	2.53328	2.72392	6.213	3.26272	2.73768	4.69213	2.68361	3.15712	10.4081	12.5883	10.3133	4.68154	5.85284	6.08931	2.75277	3.16954	4.33554	2.04387	4.02396	4.04748	1.90037	3.59493	3.11813	1.74521	4.00592	3.03838	5.01432	4.91603	4.3616	6.06694	2.70339	6.12797	4.11111	3.95813	4.16881	0.15997
TCGA-B5-A0K1	4.00578	4.37833	4.53238	9.92974	2.66773	6.63958	5.25673	3.45838	2.5363	5.55366	2.61939	2.41467	1.97201	1.3463	1.92533	4.30689	2.553	3.34845	3.02326	3.99758	2.75389	12.8094	9.60202	9.8584	5.96229	5.44093	4.78011	3.75337	3.26002	3.32676	3.5763	3.03738	2.33033	4.21795	3.37485	3.24763	5.33998	4.83171	1.91558	10.152	3.15667	6.67172	6.71787	6.28855	5.47634	6.05732	4.05329	4.67479	0.114998
TCGA-B5-A0K2	1.82395	1.47943	1.78862	5.06646	1.00907	2.66776	3.07272	1.2228	2.71853	3.77565	2.18554	1.5716	2.63663	1.65175	5.62712	1.22963	2.8037	2.31613	2.34927	1.13985	1.1946	8.38571	6.86632	7.1097	4.42955	4.26352	4.54249	2.93461	2.8511	3.8033	2.09529	2.39516	2.65469	2.13413	0.998077	2.14667	1.32622	1.57304	2.48755	2.06206	3.45552	1.78476	2.59173	4.26194	1.73768	2.75259	0.916184	1.60487	0.253088
TCGA-B5-A0K3	8.63442	2.26084	5.0843	4.84635	1.34644	3.60769	4.58161	3.25819	2.11862	1.85574	2.24543	5.22589	3.21771	2.62468	2.8651	1.82072	3.35246	2.07463	0.482916	3.0446	4.14391	17.6759	11.2705	10.2857	7.94624	6.67723	5.49171	4.18243	4.36928	3.56351	3.17009	3.34272	3.72908	3.41556	5.43316	1.99174	7.0752	4.5397	4.10785	6.00713	4.35304	3.91723	15.1891	6.06879	5.38904	9.03991	6.925	10.7057	0.0678744
TCGA-B5-A0K4	4.88662	6.16113	2.54504	4.56343	3.1182	2.81224	8.21661	4.93594	4.15986	5.32708	0.830748	3.22007	3.52137	2.60426	3.08037	4.93879	1.86684	1.7633	4.46027	2.56241	6.99208	10.4731	22.905	7.47765	5.4969	11.8036	4.58009	3.74876	5.42147	3.18169	3.39543	4.21528	2.81472	2.92735	2.40704	5.51555	4.16099	4.48951	8.75309	5.54973	5.11148	8.62524	4.93069	5.12563	7.73592	4.98021	4.87015	7.65407	0.15805
TCGA-B5-A0K6	5.04301	4.56967	6.36016	7.89381	2.85829	8.77929	2.41238	3.45913	6.1057	2.80168	2.18412	3.55438	3.94299	1.45532	2.35263	1.07606	2.22371	3.13757	1.5726	1.16544	2.59037	15.6498	18.0879	5.62704	8.48741	9.6515	2.91902	6.4642	7.32699	2.86341	4.89082	5.98071	2.57095	5.16859	6.06304	3.24409	6.59819	5.1974	2.10978	6.45867	8.28511	2.03907	10.537	4.54368	6.3931	7.91866	5.11651	4.98141	0.053628
TCGA-B5-A0K7	2.80131	1.87107	2.5754	1.49805	7.25635	1.32161	1.23806	6.58782	4.03304	0.252434	2.772	2.94809	0	3.25136	5.82297	1.32068	2.00176	4.40754	0.00516688	1.48223	3.2344	23.3038	10.0552	9.10242	11.0519	6.45506	6.53927	5.37249	4.74377	6.09102	8.12824	4.23833	4.19562	12.4566	6.36029	2.27473	10.5835	8.33785	2.17242	13.5792	6.61665	5.56607	3.27664	8.85784	4.61632	5.09005	6.85653	5.18751	0.0404807
TCGA-B5-A0K8	9.14899	3.90247	4.22146	5.59409	2.07091	2.83098	5.80515	2.24173	3.24395	5.16809	2.25638	2.46389	1.77713	4.73025	1.83441	4.92018	0.787331	1.44236	0.295513	0.841073	1.73325	11.715	28.419	9.02347	5.72092	12.503	5.2453	3.54067	5.47787	2.61732	3.78303	3.96545	3.18754	10.0017	5.88756	7.87264	7.38365	3.10399	11.0314	6.13095	4.96312	10.7622	5.97333	3.19373	8.89043	8.45876	2.67626	5.42851	0.218142
TCGA-B5-A0K9	2.88092	5.80077	8.06665	2.41695	4.53258	2.20373	5.97871	3.83144	4.24888	6.498	4.99833	3.21877	2.92864	8.16353	4.37976	1.01455	2.63284	4.93222	4.90076	2.06116	7.34697	5.222	10.3409	8.61071	3.24056	6.0907	5.39784	2.12461	4.23692	3.52965	2.41205	4.85271	2.77151	2.05541	4.76693	3.9879	2.32298	6.47619	3.31535	3.34377	6.92471	1.57609	1.49053	5.32627	2.88086	5.4199	3.31863	3.1368	0.279892
TCGA-B5-A0KB	6.8847	3.59001	1.35016	3.88611	3.8001	0.857204	3.95706	3.53425	2.85091	1.72715	2.63004	0.464657	4.12959	1.21597	0.917758	4.24019	1.93371	1.83042	3.75753	1.23064	2.0168	14.9933	7.6304	24.8441	7.43423	5.58194	13.0647	4.17624	4.01938	7.58705	5.19696	5.81565	6.19233	5.085	11.8246	8.76561	7.34889	6.20517	3.90898	6.61842	11.5708	5.29034	5.1766	6.88513	3.67985	7.07844	5.22317	6.75138	0.207716
TCGA-B5-A11E	6.83076	4.87466	5.7089	6.52061	5.35779	2.15467	1.73096	2.10691	5.9112	7.25318	2.87997	3.01898	2.86095	2.12948	4.76223	2.40677	1.85093	2.67077	2.69288	2.72823	4.11036	13.5485	20.8832	9.03249	6.44138	10.029	4.51369	3.27982	5.81417	2.6117	3.96334	5.37081	1.9337	4.43763	7.0331	4.26358	3.77006	6.2095	5.33136	6.03741	5.40683	7.2204	3.18651	4.41195	4.61022	5.03966	1.59197	5.49591	0.124858
TCGA-B5-A11F	6.46866	5.72981	6.00824	3.95238	3.83073	3.74313	7.7701	3.27419	7.75919	4.38676	2.28704	0.982161	3.62696	2.87675	5.53167	3.15037	2.87044	3.69527	8.4766	3.16685	4.83764	11.0356	10.4895	11.8462	5.28293	6.2925	6.33165	3.12703	4.073	3.06629	3.43551	3.99309	2.05074	1.82376	6.7194	2.48313	2.65069	5.19075	3.23455	5.20918	5.29013	3.05386	6.34191	6.37435	8.21261	6.93607	4.71728	2.68297	0.146474
TCGA-B5-A11G	7.44532	5.38263	2.93508	4.43025	3.67152	2.56383	1.89291	3.37465	3.75607	0.909954	2.71412	3.59809	2.63966	1.73915	4.99756	1.95412	7.89977	2.71451	4.58083	0.271082	4.55298	12.171	9.06417	19.6011	5.78118	5.98651	9.05938	3.84679	3.32063	3.91142	7.51932	9.45247	2.67214	10.1519	6.06868	3.80811	6.63377	8.12486	9.17877	7.23011	6.59583	4.0579	3.8174	2.48783	4.52683	10.4256	4.50602	6.24082	0.222753
TCGA-B5-A11H	0.252084	4.16378	8.49026	1.18621	2.1396	1.93472	1.372	1.09763	5.34916	1.70235	2.93919	1.9865	0.233398	0.950001	2.50473	0.178112	3.20531	2.01432	0.962508	0.650104	1.44826	30.407	27.5514	8.2931	11.1356	12.4418	5.04564	5.48325	6.27382	2.69781	8.90229	7.47204	4.64007	11.8686	6.64636	5.95374	7.64356	6.03843	5.73741	6.57103	3.58185	6.12742	4.17826	4.03737	3.47146	2.86678	2.10298	6.59063	0.0335163
TCGA-B5-A11I	3.76192	4.31541	2.50191	9.81287	1.60379	6.39937	2.18873	1.3696	8.80988	2.18619	1.485	5.37142	6.03055	1.33492	3.46541	1.01891	3.69596	2.87038	1.89113	1.23298	3.85166	13.3416	25.6165	7.96712	6.04308	10.9766	4.6322	3.0177	5.54968	2.92117	3.02549	5.75881	1.85277	3.57267	6.18318	5.85594	4.07385	6.38048	3.96592	3.63639	4.86044	2.67062	7.24174	3.65027	3.84739	3.84661	4.32016	8.45986	0.100465
TCGA-B5-A11J	6.71739	7.37769	4.18739	5.86689	4.44086	4.19281	7.84272	5.64803	5.81955	9.01636	4.3115	2.33094	4.66843	2.79704	2.53561	0.72114	2.45819	4.18325	1.411	2.34383	3.49373	10.8223	11.0708	10.3591	5.75908	6.47132	5.2109	3.05609	3.76013	3.89313	2.25585	3.46915	3.8665	3.82926	3.75003	3.35766	5.74277	4.14956	3.12641	6.58654	5.4265	1.77007	7.50915	7.88	3.89327	7.17677	3.42097	6.59659	0.18066
TCGA-B5-A11L	10.0739	2.83349	3.70444	5.65568	3.20057	2.95009	3.77696	6.05121	1.14334	3.00767	2.25345	4.15579	1.48882	3.18878	2.87809	1.46194	4.59838	2.14626	1.24327	2.39698	1.43462	9.53248	8.46927	17.4423	5.19685	5.86305	9.62207	2.88818	3.92819	4.94703	8.2424	3.58854	4.21726	7.00821	10.5933	4.0361	10.6428	4.72199	6.14639	8.85052	11.3489	6.3459	10.6512	5.3502	5.00557	10.279	6.37063	6.92612	0.353583
TCGA-B5-A11M	6.6686	5.73569	5.445	5.12502	5.93537	5.19472	8.30416	3.94959	4.14391	3.37658	1.60969	3.66364	3.61948	4.39956	4.76004	3.36427	1.84998	6.19157	2.35016	3.92105	1.42008	13.3694	15.8336	9.43564	5.6465	7.75729	4.60934	3.57817	4.86849	3.37088	3.72965	3.14504	3.13522	4.00692	6.33174	2.52702	4.10309	4.34493	1.49035	5.67346	7.74119	3.2587	6.89705	3.93866	4.35234	3.91165	5.32998	2.23002	0.109684
TCGA-B5-A11N	3.02741	2.33952	6.6875	7.07189	4.55584	4.54881	4.63105	1.65108	5.26669	5.1954	0.898879	1.57012	2.94313	1.58222	5.45463	1.28355	0.723641	2.35179	2.13431	1.47897	1.60864	12.7536	27.7268	7.90878	5.72855	11.6744	4.4064	3.7884	5.2651	2.26975	3.91529	6.87722	1.65777	4.33692	6.85431	2.52491	6.63696	6.46656	3.31019	4.79516	3.83795	5.19587	6.47326	4.67019	5.14109	6.05925	3.41215	4.19265	0.112185
TCGA-B5-A11O	5.16782	5.26964	3.80086	4.55618	3.55838	4.84845	4.18765	3.73844	3.59926	4.91466	5.46444	5.62008	1.7205	6.31361	2.80878	2.041	3.59348	4.93957	4.9483	3.07528	4.54724	13.5078	14.3039	8.412	6.52962	7.35694	4.89596	4.14337	3.90572	3.46711	3.6752	3.46346	2.53285	4.55239	3.45963	3.43567	8.10825	3.73242	2.74343	7.02727	4.8911	1.90382	6.47452	2.25484	5.26586	9.64943	3.31052	3.91536	0.0874308
TCGA-B5-A11P	8.22867	2.79811	3.79965	1.88958	4.07716	6.13136	8.91514	2.47191	5.63701	4.11415	1.59938	0.0751415	0.895663	1.81387	3.06389	2.93792	2.61818	4.29676	2.24624	1.94384	0.416626	13.6014	12.4108	13.2849	6.82527	8.29674	6.8641	3.90296	5.14433	3.95495	4.62492	4.56416	2.86024	6.14182	8.30755	3.77892	9.23448	10.2656	4.43917	9.7609	6.05165	6.63668	6.73642	3.24348	2.86052	7.38323	6.27922	2.38238	0.161075
TCGA-B5-A11Q	4.96613	2.75134	6.318	7.61903	2.98891	9.0458	1.0775	3.01759	4.02873	6.55543	3.30218	2.10188	3.03482	2.78165	3.05972	2.04619	2.60596	0.857489	3.90355	2.43012	2.15985	14.5199	13.313	7.5806	7.47315	10.1914	5.41049	5.08079	8.71392	5.22272	4.28867	6.52665	4.97767	5.37713	6.30034	5.36939	12.6538	4.34788	4.33597	5.56011	6.3833	7.81006	7.41316	6.93676	6.16331	4.6523	5.01154	3.6798	0.087408
TCGA-B5-A11R	2.6083	3.7224	2.50608	3.51182	2.67053	3.45281	4.29344	4.56586	6.09418	6.47151	1.14621	2.52072	4.04241	1.28819	7.8895	2.37692	3.14587	3.80748	1.88132	0.648062	2.68067	15.7867	29.4465	6.80437	7.6455	9.78796	3.45433	4.29636	4.13985	1.89761	3.42421	4.12801	1.82737	5.41786	5.96345	3.83904	4.08226	3.20873	5.35821	6.64721	1.8938	7.77473	7.21703	4.24216	8.54334	7.80413	2.10976	4.44326	0.113136
TCGA-B5-A11S	5.61899	2.61324	4.60103	4.75227	4.42132	1.77882	3.7922	2.88653	1.64301	5.65756	5.30723	8.48558	11.1444	2.59158	6.15809	2.14815	5.15364	4.68958	2.74285	4.63775	3.00251	12.193	10.198	9.37844	5.79912	5.57414	5.71024	3.26998	3.23445	3.80327	2.31061	3.05222	3.21779	3.7377	4.54898	3.80847	6.92484	3.37853	3.72167	8.20728	4.56754	2.93473	6.68585	3.56558	6.29381	6.07364	2.7338	1.99208	0.0977542
TCGA-B5-A11U	4.12967	4.56018	3.8492	6.11946	2.29715	5.47153	4.85453	5.23165	5.34237	2.65556	2.53962	5.451	2.14824	2.73903	3.78813	2.64979	0.816171	1.46553	8.74915	2.70834	1.67632	13.7066	12.5472	12.8088	6.42974	7.01203	5.86896	3.61775	3.93273	3.8597	2.20758	6.5747	2.9896	3.83915	6.56113	2.91488	5.10858	6.08757	3.26244	7.38989	6.18805	4.27062	7.74527	5.27549	7.19904	3.96859	4.89432	4.09781	0.124066
TCGA-B5-A11V	4.38548	6.99296	5.88506	2.24366	1.67844	4.31449	3.58628	4.12877	4.2463	3.95451	4.27935	5.05919	3.23959	5.01683	2.31662	5.3179	2.1138	2.8478	3.87802	5.13976	2.07425	9.11068	10.0868	9.98212	4.84432	6.19664	6.3635	3.12652	4.32243	4.61839	2.34467	4.65896	3.02264	3.34714	6.26261	3.7746	6.41948	6.14474	2.91509	3.14339	2.48613	7.9901	3.06803	2.17414	7.51414	7.39022	4.36048	3.49685	0.21508
TCGA-B5-A11W	5.08422	6.54625	5.03038	4.25502	4.02663	3.49309	1.94449	3.71398	1.53319	2.22055	1.13845	2.71858	2.90361	2.17817	1.95657	5.06957	6.03235	4.42643	1.26946	1.60171	1.99034	6.66279	10.0635	9.60248	3.53234	6.64327	5.32484	2.51482	4.48233	3.84544	2.03812	3.8668	2.94852	1.54842	4.41752	2.36086	1.58966	5.26884	1.30485	2.59355	4.74496	4.38148	2.27102	3.45981	5.95734	2.52294	4.9662	5.05665	0.294233
TCGA-B5-A11X	4.8815	3.10568	2.66685	1.71897	1.42033	4.17091	6.94136	2.78574	4.68559	4.74391	0.893682	2.59682	2.77116	1.28774	0.38458	0.146723	1.86453	1.83613	1.54702	0.768896	2.5586	14.1967	22.3021	9.79356	9.13616	11.9916	6.84208	5.50254	7.35366	4.0717	3.68034	5.94559	3.87796	7.79743	9.1954	7.56413	8.91831	8.87025	6.35883	4.58588	8.11194	6.9039	8.21616	2.95242	6.66723	5.30868	2.41616	2.36161	0.139129
TCGA-B5-A11Y	3.04908	5.94556	4.89234	3.94248	6.61308	5.47355	3.77212	3.20301	5.77826	4.01982	0.945016	4.23137	3.10529	3.46601	3.89473	1.07371	3.71939	4.14853	1.57654	2.86669	2.80692	5.50496	7.9695	8.77827	2.84693	4.67664	4.98565	1.96284	3.44966	4.4653	1.52734	2.25067	5.59596	1.69006	4.50453	3.70395	2.90468	5.13237	4.05096	3.0294	6.15271	4.46915	3.12103	8.28746	5.39685	3.47124	4.95888	2.72338	0.308741
TCGA-B5-A11Z	4.24623	5.06315	2.79331	3.79652	5.46315	3.54142	3.56554	3.43201	3.51591	3.67105	5.28403	6.24247	5.11133	2.56194	6.4326	8.16094	1.79185	3.21827	9.0844	3.97242	3.75449	8.21006	8.41654	8.99541	4.30031	5.86789	4.76172	2.90458	4.2581	3.6321	2.66269	3.33671	3.25428	2.43734	4.19359	3.16398	3.41732	4.6918	4.11978	6.08284	5.11355	6.33527	5.95785	4.43615	6.034	3.85187	7.38989	4.59301	0.189191
TCGA-B5-A121	1.77072	4.96932	3.53469	5.54112	5.70179	2.89112	3.51325	1.32383	2.22623	7.59229	1.3575	5.22519	4.99621	3.5125	2.13669	3.26073	3.76735	1.5765	2.9763	0.560597	0.152963	10.6092	20.4517	7.37223	5.57088	10.5513	4.10353	3.67314	5.34546	2.37961	3.67911	6.41435	3.07537	3.57966	4.53634	1.92117	7.16035	4.72894	2.83655	4.26355	5.46093	3.9288	4.24398	4.83004	6.82576	4.61652	3.55712	1.71438	0.111891
TCGA-B5-A1MR	9.76398	3.60561	5.45537	8.17205	5.17215	3.80977	7.93831	2.32618	4.77847	1.07726	7.94814	3.37086	2.78879	4.20169	1.91922	2.52271	2.19553	1.56086	1.82473	3.51172	3.02123	10.8513	9.29279	15.7283	5.98218	6.421	9.10674	4.40066	4.01779	5.09154	5.50402	4.04959	3.57717	6.43899	4.16447	4.10722	6.79337	8.70163	3.72176	2.85633	8.09671	5.54976	11.2671	6.07001	9.5116	6.49447	7.37388	8.04589	0.2422
TCGA-B5-A1MS	0.624234	5.4158	3.96709	2.91334	3.3781	4.68564	1.93758	4.57983	2.55784	2.97558	1.43002	3.45957	0.230527	0.364823	3.27439	1.33548	2.73341	4.27012	0	2.00319	3.85797	18.4783	6.45378	13.4445	9.71779	5.61849	8.64882	4.37109	5.39922	6.6867	6.09846	5.23409	4.45689	8.0172	5.47787	3.91334	17.6379	8.29483	6.06434	10.6933	10.8699	3.88784	9.91901	8.25896	6.50754	3.08505	5.63779	4.0818	0.166319
TCGA-B5-A1MU	5.60846	4.72179	4.25793	6.40004	4.22575	7.29005	5.60539	6.4267	4.26093	2.63749	1.77105	3.92652	2.62194	3.66309	1.31038	3.45352	3.14196	6.40425	1.1413	6.65591	1.28414	11.4427	7.42877	13.1954	6.26861	4.81263	7.13735	3.82426	3.53248	4.67813	4.52585	4.58358	5.50078	8.44415	5.92833	3.4525	7.75572	3.94882	5.64629	9.0171	4.84771	3.56433	8.0246	5.91659	4.88873	7.83049	6.80276	5.97353	0.200229
TCGA-B5-A1MV	8.7295	4.02857	4.7687	8.27717	5.98223	3.37966	3.76401	8.44719	4.08559	3.87139	4.62204	3.84584	3.8788	2.28922	2.25089	3.38814	1.49832	1.42451	3.36163	3.74928	0.97292	8.85951	5.7349	12.8894	5.05365	3.37012	7.26609	2.58727	2.50299	5.75356	4.15152	2.11799	6.50822	5.52894	3.66353	4.53072	8.93228	2.78616	5.59135	6.25013	4.9654	3.81272	9.93253	5.98591	5.86094	6.7497	2.99768	8.5698	0.304193
TCGA-B5-A1MW	3.11502	5.33323	5.08549	2.95433	2.75685	4.07225	5.78513	7.90858	7.63053	4.6035	2.73932	2.24929	1.76599	1.81205	3.18341	2.68664	1.02156	2.77636	3.15222	7.46142	3.38044	8.42071	8.19609	15.4411	4.19722	4.25072	7.29759	2.10855	1.92566	3.08906	2.44827	2.16352	3.06341	2.61876	2.65795	3.30362	2.23502	2.07885	4.70022	5.37014	3.17486	8.62167	2.90674	5.49207	3.98423	8.4429	3.9417	5.3769	0.377562
TCGA-B5-A1MX	8.48061	3.94674	4.78744	4.03506	6.80094	3.02334	5.81076	4.5405	2.72969	3.29605	5.40292	2.00436	4.5695	4.03853	1.09582	3.63343	8.05637	1.02716	0	2.05271	0.960253	11.6467	4.18136	13.8615	5.93663	3.30158	10.4831	3.28401	2.49797	8.8029	4.2349	2.35397	6.89423	8.75774	5.00421	5.42086	5.82379	6.18888	7.81646	8.08245	3.23332	5.40441	9.95238	7.00821	3.37877	4.52309	2.28914	4.8688	0.234096
TCGA-B5-A1MY	2.93295	2.13343	2.77704	2.75854	1.77232	7.50349	2.42004	1.0271	3.2376	1.67801	0.830266	1.20938	0.477091	0.764568	1.59694	0	0.381284	2.21493	0	1.06186	2.80466	16.7032	32.6492	6.12776	9.22814	16.8112	4.01993	5.70635	7.94442	2.69293	3.80011	5.72707	1.93601	9.90758	6.30154	2.98021	12.3851	5.80812	6.54732	11.4389	3.81786	4.67513	9.60787	4.6489	6.85184	9.07979	2.2258	5.34863	0.116423
TCGA-B5-A1MZ	0.642611	0.153141	1.17662	1.49537	0.930108	1.45179	0.722008	1.23568	1.59391	0.360993	0.161555	1.56809	2.59791	1.0982	1.86497	3.16652	0.356431	1.95884	1.44178	0	1.81559	6.32411	60.6101	0.398063	7.11262	15.7072	0.228217	15.0275	9.75259	0.32483	32.6966	0.998555	0.427944	16.7836	2.00447	0.551041	7.46258	1.19983	0.739832	3.02601	2.81649	0.786446	0.306317	0.460726	1.03357	0.205316	2.51499	0.939321	0
TCGA-B5-A1N2	3.12555	3.93967	4.91989	3.62918	2.60801	3.32355	3.72368	2.42132	4.15522	3.21263	2.41433	3.51711	1.00181	1.94128	10.6517	6.36625	2.02305	5.18498	0.985028	2.2644	3.10804	14.8605	10.4395	10.2167	8.07517	9.05317	6.17173	5.40969	6.644	5.38268	5.10083	7.50062	4.48808	5.7609	4.84176	1.84309	6.34332	9.99367	2.49976	8.51883	2.90239	2.78613	7.10495	5.63627	4.04645	10.2167	5.6042	5.22989	0.117339
TCGA-B5-A3F9	3.26725	1.52918	4.35202	8.69569	2.15463	3.25414	6.34989	4.5401	5.5598	2.78186	3.34359	2.05551	6.54037	1.70706	2.67338	1.7028	1.06411	1.91634	2.42327	0.82784	2.96092	10.3458	15.3852	14.2568	5.44943	10.1857	8.32136	2.98914	6.35537	4.43917	3.76735	6.76209	3.95615	6.39948	7.35294	3.19702	5.26476	6.94375	5.8907	7.96492	7.68742	3.18098	6.14358	3.41669	7.14472	8.3229	3.86465	3.36309	0.239817
TCGA-B5-A3FA	5.06782	4.14654	1.93384	7.17168	2.41409	2.39128	4.22064	8.05941	6.38449	2.45566	2.79828	6.75943	4.41905	2.93579	2.57965	0.943145	4.58896	1.32833	3.88299	2.02901	2.84775	9.57315	8.22905	16.5423	4.86092	5.86342	8.09091	2.71486	4.04271	4.66228	3.26453	4.36966	3.40365	5.48721	6.58593	2.71284	6.30229	6.47884	3.90605	7.71161	4.46147	6.08724	4.77219	5.7333	5.85612	9.46587	4.24874	2.96557	0.305149
TCGA-B5-A3FB	7.09057	0.413446	1.99277	4.02625	4.71916	1.98704	5.14464	7.23796	2.36934	5.19881	1.11433	2.14656	7.26762	4.4035	1.89801	1.61455	0.606231	3.10881	1.29154	5.84564	5.85882	9.33399	5.56883	14.3295	4.87909	3.77304	7.98151	2.91952	2.22104	4.28305	4.02406	1.96655	3.33946	7.73288	3.99351	3.50227	5.76262	2.2375	5.86168	6.75206	6.21806	7.01962	4.23646	5.47266	3.0075	4.93219	2.35103	4.93495	0.300173
TCGA-B5-A3FC	6.44539	2.58342	3.92067	4.4494	1.1729	4.26468	4.22128	3.46511	4.21963	4.06987	3.28016	0.83612	2.23293	6.82229	2.70502	0.800096	4.41067	3.6545	0.635401	0.0355955	3.04939	9.74235	8.44456	13.0594	5.42797	6.48429	7.50047	2.87316	3.23076	4.68167	3.12109	3.17588	2.43675	6.13421	6.11209	7.63502	11.8425	5.04297	6.54629	12.1644	4.83602	5.92792	7.4754	10.0659	3.37644	11.9419	4.89892	4.72602	0.274015
TCGA-B5-A3FD	8.05922	2.49007	7.4699	3.69533	2.56117	2.39313	8.18026	4.68139	3.11439	2.90135	3.43439	3.37247	5.04983	4.25881	1.46958	3.32834	1.82899	1.52802	4.75609	1.06932	2.52101	7.44381	7.51236	9.048	4.48524	5.80825	5.68282	3.23473	4.74979	5.13745	4.23311	4.9646	3.273	5.15755	5.10684	3.4236	8.03587	4.22288	2.63542	5.65718	2.64804	3.07509	7.5051	4.67005	5.79349	6.86413	4.13982	7.46928	0.250183
TCGA-B5-A3FH	3.63419	1.80168	4.23632	6.48918	3.06023	1.43835	4.38436	1.82127	7.31367	2.64183	3.1259	7.14305	3.27559	3.38452	2.07253	4.29795	1.69053	1.67118	0.551006	2.92017	1.77125	6.25402	7.81545	9.24023	3.39962	5.60546	5.35458	2.00285	2.98627	3.10018	1.90677	3.5438	2.56466	6.91407	2.93916	2.94073	3.49053	2.61774	2.55582	4.78128	3.49045	2.31902	3.82664	6.24631	3.58962	1.65856	2.84504	3.27989	0.43815
TCGA-B5-A3S1	5.99288	5.8666	2.67819	8.28985	2.60035	1.91644	4.27413	5.67833	3.88255	2.38855	4.53821	2.56464	2.62542	5.58902	1.54132	1.76722	1.0709	4.12106	0.259169	3.18075	2.77936	13.054	5.89372	17.4878	6.58985	4.15596	8.9023	3.92618	2.94832	4.61827	3.73119	2.70012	3.72549	9.15446	5.07943	5.86094	10.3716	6.71861	4.98292	7.54298	6.0344	3.77752	10.0796	9.50841	9.48855	9.95294	5.80035	9.30441	0.223684
TCGA-B5-A5OC	5.42323	4.43346	6.1	7.05767	2.35518	6.70041	3.15806	3.76373	7.29954	1.38333	2.54421	3.71727	3.40084	4.28863	3.98372	2.63594	4.09432	4.06229	8.52144	2.9469	4.89858	8.81823	8.46671	6.87188	5.44912	6.71697	4.05439	3.79928	5.49503	2.91647	3.75143	3.98681	2.55652	5.11105	4.92934	2.18017	5.4803	5.37154	1.8024	12.4992	4.93717	2.1528	8.01502	3.69469	2.09194	5.25526	5.31014	2.23387	0.179454
TCGA-B5-A5OD	1.0351	3.45085	2.60378	0.464412	3.91291	6.05215	0	3.72962	3.86794	0.304643	4.28731	1.57009	0	1.51135	1.03045	0	2.47549	4.68079	0	0.693226	1.85169	24.0564	11.48	9.39568	11.9343	10.408	6.22954	7.97468	6.83872	5.12321	11.6468	6.73448	3.54649	12.9495	9.27577	4.54369	11.9592	7.01156	11.7238	9.47761	5.44868	6.04995	6.03202	8.31893	4.11613	2.16528	3.49085	5.95733	0.0482297
TCGA-B5-A5OE	6.80498	5.2566	5.22365	2.06257	2.84869	7.7732	0.228588	2.05161	3.3161	1.48351	0.996645	7.39695	1.51025	3.21917	3.42377	0.0877306	5.6594	0.362834	0	0.74593	2.20369	14.8134	8.04947	9.35616	8.13064	7.65409	5.27132	6.99445	5.95248	3.66248	7.06858	6.66186	4.21432	10.4401	7.82126	2.82601	9.89484	5.7865	4.93453	11.4688	8.57846	5.17661	11.1256	7.40916	3.02329	7.88609	6.14028	7.42366	0.104191
TCGA-BG-A0LW	7.32665	1.60034	4.1038	2.59457	1.83147	3.74047	6.91717	3.32123	2.4494	8.35509	3.10956	6.59043	3.47865	2.20182	6.16636	6.27399	3.83038	1.02634	2.09931	5.16788	1.65832	8.63009	9.36186	8.9777	3.88078	5.79226	5.11878	2.27528	3.00302	3.85145	1.62646	1.85441	3.11353	3.16293	2.09124	4.7391	3.67165	1.07689	2.44597	4.93662	1.36087	6.30675	9.53978	2.83978	5.46877	4.44997	1.92836	7.86764	0.192825
TCGA-BG-A0LX	11.2488	2.54994	4.80826	0.070665	3.32974	5.87039	1.16862	4.3704	5.41691	2.18909	6.11091	5.44675	0.363166	3.49752	6.14158	1.55656	4.23749	4.20397	1.94958	0.881534	1.7845	22.4648	7.40603	11.5938	9.62317	4.2403	4.50932	4.93577	2.65535	3.07705	4.99126	2.21482	2.38497	5.75666	3.15907	2.5826	7.58226	2.17595	3.07282	8.10481	4.04873	3.69379	4.14329	2.99999	1.31842	11.7722	6.69559	3.78468	0.0351679
TCGA-BG-A0M0	2.9057	3.28431	4.37201	0.798273	2.87384	3.4951	0	2.34377	3.74002	0	2.95006	3.19746	0	5.80369	1.34864	0	6.98714	4.35452	0	4.41175	2.25215	24.3242	7.28649	10.8259	12.0008	5.03883	6.43531	6.38501	2.99018	4.92028	6.93843	1.45848	3.38072	16.0059	1.33877	3.79858	15.5525	1.34876	7.62052	4.63953	1.43351	4.91413	6.99465	1.98142	8.5909	3.45499	3.1429	6.01206	0.0257909
TCGA-BG-A0M2	6.36742	7.51299	3.91655	4.55105	4.41781	3.62295	3.48311	6.80599	2.59987	0.604487	3.69812	2.60231	4.66642	4.10958	5.00744	0.696073	1.98352	1.63335	1.27658	1.71918	1.79415	12.9712	8.62004	15.3696	6.29302	4.57871	6.89795	3.18756	1.91933	4.15006	4.53151	2.06469	3.56309	7.71908	2.67938	5.97898	9.14686	3.89836	4.61813	10.3637	2.51222	7.44809	9.61825	4.26461	4.26168	8.30271	2.87385	3.18026	0.17432
TCGA-BG-A0M3	8.2202	2.93089	2.60368	5.02171	5.1384	6.40655	2.38159	2.46394	2.52895	3.83881	2.50173	1.5588	7.56239	3.72127	5.34321	2.59031	3.57271	1.13565	3.63942	1.6554	2.97593	11.768	8.42545	11.4162	5.12915	4.94613	6.6368	2.29942	2.30835	3.9941	3.03888	1.41947	2.60322	4.51759	2.40384	4.02665	5.59346	2.2519	5.63238	6.65019	2.33585	5.53015	11.5787	1.72746	8.61147	4.84203	2.95326	5.15602	0.162358
TCGA-BG-A0M4	3.88767	4.86137	5.22189	2.0912	6.40123	5.28789	7.41304	3.90667	4.43611	4.86681	2.90535	3.21173	3.97494	3.70468	3.3789	3.22762	2.21532	3.71871	1.9033	1.89398	1.90108	10.2663	9.24178	13.262	4.81698	5.67714	6.12572	2.35109	2.34502	3.14204	3.04074	2.05304	2.46233	4.21552	1.37854	7.40129	6.0035	4.04279	6.67928	5.24521	3.02016	2.65731	6.45008	4.16912	4.9268	5.03816	2.00762	6.30897	0.203511
TCGA-BG-A0M6	4.62929	2.73826	3.23747	1.75399	2.28014	2.46931	6.23249	4.49051	3.12548	7.68205	2.57685	3.26689	6.3934	1.89384	4.15595	2.83475	2.9318	3.72754	4.00646	0.573255	2.02301	10.0308	8.345	7.54607	4.15106	6.63336	4.10241	2.39475	3.56768	2.88754	2.52805	3.02532	2.72424	3.42907	2.54726	4.23555	2.76809	1.81188	4.9171	5.70173	1.40541	5.08433	4.67303	6.01606	5.49484	5.68494	3.27322	3.5549	0.22201
TCGA-BG-A0M7	4.72617	2.81062	2.38536	4.99799	3.06428	3.9354	7.88606	1.70883	1.96833	5.99963	2.14347	3.83393	3.30116	6.64016	2.5336	2.1232	2.45036	2.34763	1.95146	6.02541	3.84232	13.1952	8.99131	11.5495	5.93847	5.10347	6.56529	2.73105	2.40205	3.76023	2.99495	1.46247	3.98363	6.59128	1.00165	3.01259	11.6329	1.28667	6.49438	8.31563	3.12904	7.30132	10.4461	1.98868	6.66058	5.66796	2.86475	4.5107	0.131397
TCGA-BG-A0M8	11.8846	6.26358	4.68361	7.80741	7.17134	5.24437	5.33506	6.36447	9.15854	8.65288	3.24477	5.95386	4.54401	4.45342	4.69364	3.51161	5.86945	5.21799	5.48608	1.68187	3.50433	12.159	7.12324	12.1724	5.72723	4.77054	4.62231	2.42762	2.53636	2.48727	1.40807	1.80964	1.92625	5.19505	2.72801	1.41159	4.54762	2.94231	2.37378	3.74706	3.99336	3.50714	11.1007	3.09874	4.38224	5.00853	4.09205	9.86074	0.131636
TCGA-BG-A0M9	5.94957	7.87735	1.42824	4.97227	5.54513	5.92117	6.38427	3.42241	4.92918	1.7176	8.50098	4.07043	2.71704	3.45655	1.92558	3.89595	2.26157	2.20636	4.46802	4.50229	4.934	10.4973	7.12702	13.5456	4.44616	4.8641	7.67975	2.59559	3.21701	4.74295	2.25293	2.87216	3.30811	3.13144	3.6648	3.29573	3.79397	4.22917	3.02142	5.4034	5.69538	5.52375	9.01647	4.61685	4.82447	7.25293	4.0836	7.63763	0.220523
TCGA-BG-A0MA	4.13046	2.82815	3.68718	2.43792	5.27634	4.95498	6.30742	9.10457	6.31641	1.30264	6.35037	5.8437	2.07142	3.18821	5.39916	4.32585	5.9441	2.69891	5.06819	3.68295	2.9008	10.71	7.7305	11.7882	5.06107	5.34398	6.23797	2.93272	3.84984	4.15062	2.18499	3.26368	3.4386	3.11458	4.62135	2.94336	3.76325	4.32664	4.24905	4.12552	4.35461	3.07765	4.02919	4.46669	4.39952	5.72838	3.78274	3.64465	0.15649
TCGA-BG-A0MC	6.76848	4.84221	6.4225	4.57739	1.0753	3.93167	3.30743	5.42884	3.05917	9.68333	2.6692	2.36282	4.45399	5.05398	1.13673	4.92752	4.77245	0.745143	1.6498	3.1276	3.55896	10.3602	5.30922	16.8441	5.12735	3.3387	8.86913	2.53323	2.33709	5.41334	2.95024	2.04857	3.98556	3.29559	2.67341	3.57642	4.04978	3.89966	2.9501	7.77004	4.67598	3.32358	6.85916	4.14477	4.62893	11.0383	5.28999	5.20291	0.262468
TCGA-BG-A0MG	7.11976	5.62303	6.61121	5.23833	3.75211	6.42679	1.88123	3.60951	2.06075	3.97522	3.94084	3.88483	4.95591	2.7112	2.66701	3.96602	3.56311	1.12237	3.75163	2.35783	5.3776	10.6934	8.51629	11.3752	4.79871	4.71624	5.43634	2.75406	2.46551	3.60226	2.45504	2.29613	2.77654	5.49739	2.36883	3.12829	5.74402	4.4704	5.53492	7.23809	3.65415	5.19254	4.56553	3.45191	8.22772	6.95575	3.64976	3.52217	0.158808
TCGA-BG-A0MH	5.01529	4.21798	3.01718	10.5102	5.97887	5.10037	2.70559	5.13299	9.53933	1.19486	2.90008	3.44422	7.12821	5.71998	6.39147	1.41047	1.7528	4.91316	5.12852	3.17418	1.09507	11.9356	8.35633	10.6595	5.30154	4.85903	5.83131	2.96715	2.82627	3.96452	3.76429	2.41376	3.10958	4.26707	3.7254	1.7114	8.5175	3.32042	2.79502	7.20964	4.41098	2.07703	3.9076	3.92033	4.44317	2.48031	5.86238	5.58637	0.19471
TCGA-BG-A0MI	10.5186	7.18805	2.09432	7.07079	10.5549	4.33507	2.46589	4.29927	5.76978	5.53941	4.35812	1.84662	3.99937	2.3186	1.72786	6.99316	2.99682	2.04908	2.59584	4.98191	2.06026	14.2357	5.28097	14.0941	6.24157	3.45688	6.60206	3.15698	1.76317	4.37938	2.56225	1.45619	2.9293	3.4939	3.00903	3.38671	6.357	0.826253	5.86695	5.05054	3.64685	5.58584	6.01343	1.93429	6.91176	4.21151	5.9874	3.44124	0.11473
TCGA-BG-A0MO	3.60746	3.24137	6.16138	6.17451	3.29994	5.22339	7.74395	5.85422	4.15397	3.78371	3.27746	4.16949	3.94118	5.34115	4.51844	3.9987	2.96312	2.65517	4.64903	2.88316	4.34348	9.14403	7.3104	9.214	4.06588	4.90249	5.50255	2.21157	3.65686	4.22517	1.80008	2.62788	3.37204	3.08045	1.82397	2.28761	2.94221	4.23579	2.0929	2.53691	2.44803	5.01537	6.41128	2.77913	2.43365	3.62329	3.69799	5.78596	0.222021
TCGA-BG-A0MQ	6.34836	3.8247	3.79293	6.44674	8.79945	3.27688	4.47663	2.62341	4.95839	7.29687	2.51263	1.70035	2.65644	3.24378	2.0118	3.44009	2.28283	3.24656	3.24675	2.02519	1.60832	9.90591	9.91844	13.7798	5.12663	6.99463	8.82361	3.17422	4.45537	4.48333	4.11556	2.1055	3.17848	2.42608	7.17045	6.31539	4.52951	4.83368	7.9782	7.21337	3.16148	6.86849	5.75353	8.29055	5.31173	2.20108	3.81929	4.20879	0.158544
TCGA-BG-A0MS	1.9256	3.92043	3.2975	0.499436	3.42183	3.99564	1.61854	3.42116	2.7239	0.0494802	2.00346	1.79799	0.371233	3.07704	4.08677	0.838306	3.15747	3.68729	1.89019	4.23938	3.21259	18.7562	6.86282	13.7772	9.96186	4.35784	7.72702	5.24464	2.30834	3.96351	6.61955	1.58741	4.41208	9.76377	2.30145	5.85727	6.97623	3.02067	6.86122	11.1316	2.84348	3.06097	15.8081	1.52887	5.43834	4.7647	4.70349	5.7196	0.0806466
TCGA-BG-A0MT	2.28957	6.09189	5.22229	6.50464	4.41892	1.1998	4.76288	2.52008	6.2652	5.61736	1.70841	7.01711	5.60359	2.75637	2.32478	3.78417	5.45995	2.09219	5.33947	3.33482	5.20727	10.4486	6.16203	14.1431	4.53172	4.33908	7.17091	2.40836	2.56239	4.96685	2.64405	1.66801	3.54443	4.08022	2.77736	3.48416	6.35386	1.19879	2.81768	8.25191	6.14141	5.72409	4.20721	4.73212	4.55444	5.14094	5.28679	4.06742	0.226152
TCGA-BG-A0MU	6.56314	4.62813	9.55233	1.86648	1.61387	3.53202	6.61017	1.4204	2.24514	6.77171	3.50625	3.14086	4.63222	1.83194	2.549	8.06287	2.84799	2.72439	3.94965	4.16839	2.9871	9.03489	5.20057	10.6543	4.08903	3.09995	6.04955	2.35952	1.85686	3.88115	2.13221	1.58765	3.11867	3.19331	1.59907	2.89858	4.54146	1.63504	2.85335	3.07733	0.776878	2.21186	7.13904	2.78186	2.43212	2.27298	3.44236	4.54791	0.209508
TCGA-BG-A0RY	3.96173	4.58321	2.59198	1.4208	3.70228	4.48548	0	1.98691	3.44241	0	3.34485	2.38547	0	3.32656	2.98484	0	4.92189	1.31769	0	2.5816	3.12627	25.2575	7.15742	13.6117	10.8727	4.76723	6.36573	5.25885	2.49825	3.64751	7.22508	3.25132	2.43021	10.3399	2.72376	4.02419	9.29806	5.19676	3.88016	10.7611	6.32442	11.2468	10.7427	2.78924	5.6136	4.86154	5.16165	6.74823	0.0387919
TCGA-BG-A0VT	5.23422	3.52116	5.51615	0.624412	4.81292	2.7203	0	2.03561	5.15428	0	5.2845	2.63008	1.3218	4.46386	5.09552	0	6.37061	1.40644	0	2.13075	1.3194	29.9016	6.31215	13.5932	13.5209	3.9004	6.43792	6.57851	2.67668	4.0606	4.13916	2.38912	2.9147	4.50902	3.17703	2.95708	3.41772	2.16605	3.33717	7.86156	4.254	5.50984	14.2822	6.13837	5.13573	8.60888	6.62112	4.55474	0.0440035
TCGA-BG-A0VV	1.46842	2.52979	5.63388	6.2349	5.60504	3.41916	1.2416	6.41063	3.85397	0	2.59747	2.92187	0	5.74215	2.12717	0	2.83823	5.83943	0	0.932036	0.663738	25.2491	6.41755	14.6695	9.65015	3.55168	6.41927	5.73096	1.86218	3.56897	4.32919	1.17818	2.5208	11.3301	1.64798	2.1971	7.2353	2.55175	3.00214	10.7573	3.01363	4.58205	13.5021	1.69338	2.63138	3.27087	2.85872	4.4186	0.0601411
TCGA-BG-A0VW	4.46839	4.1869	3.66409	3.75614	3.47352	5.24302	8.38092	3.50706	6.30028	7.73647	3.91458	6.61726	5.44486	6.58362	2.33458	2.37248	2.98315	3.53703	7.38909	2.83193	3.07694	9.14265	6.89428	12.4773	4.64211	4.20113	6.18109	2.90029	1.87925	3.37028	2.59946	1.62742	3.47012	3.15785	1.46826	2.56004	5.82193	1.72151	5.8623	4.5937	2.81476	4.6406	3.9189	3.52469	6.58311	4.06923	2.90769	7.67578	0.256752
TCGA-BG-A0VX	7.16601	3.82469	3.67124	7.18962	2.77745	6.29709	2.92916	7.92196	4.44648	3.02761	2.77052	3.0264	1.9721	3.16698	4.24113	2.45264	1.59524	2.54196	1.42865	2.50001	3.04123	17.2589	7.17857	14.7786	6.7373	4.53431	7.30141	3.36393	2.01072	3.93066	5.17768	1.42546	3.10413	7.8153	2.38337	1.81254	9.91375	1.15727	3.59614	6.91253	2.6534	2.43875	7.43102	0.944443	2.90997	7.97526	2.26359	5.88146	0.140262
TCGA-BG-A0VZ	5.46249	3.71873	1.41286	1.04875	1.91359	1.73286	4.85915	2.53964	2.46788	3.75011	2.18568	4.90447	2.59899	3.26252	1.03626	0.620854	1.39241	2.7718	4.58478	1.53226	2.12953	8.60295	12.9942	5.78742	4.07801	5.86948	2.87815	2.25194	2.58593	1.75572	2.27679	1.91698	1.70508	3.09735	3.84489	1.68153	4.25332	2.11533	1.9226	5.0781	1.76946	3.83514	3.55761	2.01133	1.46795	2.40344	1.99463	3.34419	0.187792
TCGA-BG-A0W1	4.34793	7.69925	2.97481	4.28272	3.83245	2.23137	9.07022	2.12948	2.4179	3.8144	6.56965	3.03848	3.16545	7.49986	5.16297	2.16167	4.35578	2.02776	4.47219	2.56809	2.85946	11.0294	7.54122	14.5734	4.4842	4.263	6.54944	2.07687	1.91274	3.60292	2.53932	1.76187	3.57022	7.01666	2.35063	3.78552	6.13802	3.57127	4.45856	9.05329	2.60904	6.82873	10.6978	5.44462	3.74719	7.82018	2.53699	7.22244	0.241901
TCGA-BG-A0W2	4.93839	3.80509	9.46844	4.00468	6.37619	3.92959	7.84138	2.1923	2.95728	2.38697	2.27991	2.7469	3.93732	4.84609	2.30804	7.22614	0.309255	2.36169	1.90669	1.90005	5.0247	9.77988	8.19314	13.5325	4.14243	4.48244	6.13893	1.84403	1.99984	4.23254	3.0527	3.26072	2.15646	5.86251	4.23045	2.76727	6.69986	3.36347	6.70114	7.31737	3.79491	5.39899	6.41422	2.13731	3.44325	3.85743	3.77022	5.27384	0.262684
TCGA-BG-A0YU	3.36017	4.17052	2.19143	0.843911	5.42804	3.68907	2.37682	4.49562	3.83386	2.46687	4.20192	3.69881	0.950385	4.41954	4.35639	0.725705	1.90091	5.78413	0	2.96079	3.38382	21.3018	8.44969	11.8691	8.95945	4.76975	6.15487	4.41436	2.75788	3.92475	8.37171	2.54334	2.37389	10.6318	3.93508	3.72511	7.26189	5.87089	4.72004	10.72	2.47279	4.56622	8.68342	2.99511	3.90145	8.93169	4.13907	6.89847	0.0800705
TCGA-BG-A0YV	2.80608	3.50081	1.38142	2.07062	4.5852	2.27248	1.5516	7.44272	2.18789	2.06753	4.54075	0.709241	2.94735	5.2161	0.186991	0	3.79862	2.7965	0.620465	5.51785	2.41266	19.898	5.57613	13.2328	8.15227	4.01135	6.84204	4.02415	2.70488	4.30819	3.31664	2.07242	2.33886	8.53508	4.17668	5.26336	15.2838	5.76773	5.92215	11.1358	4.82769	8.99389	7.26798	4.03904	9.03818	4.9596	7.61781	3.66855	0.0987666
TCGA-BG-A186	5.24151	3.78286	5.81902	3.45013	2.49438	4.15739	8.04479	4.43848	5.72719	6.71402	2.23368	4.61243	2.7641	0.888913	4.44322	4.08314	2.44983	4.33479	2.49166	4.25585	2.44416	9.80577	5.44217	11.7457	4.01087	3.45132	5.6722	1.93952	1.93828	3.85245	2.26793	1.39042	2.75169	3.27876	1.37211	2.45368	4.14455	1.39308	3.68091	7.39581	1.82288	4.38976	3.93213	3.26081	2.92159	8.49617	3.66673	2.90388	0.249453
TCGA-BG-A187	14.2549	2.19776	3.19779	5.94222	4.13584	2.21178	6.73412	2.18359	1.6407	0.138337	3.13685	3.54607	1.99153	3.70948	4.97917	0	1.54806	1.86898	0	4.718	3.90702	14.795	5.90558	13.47	6.08885	3.38012	6.83557	2.86038	1.87103	4.55825	5.40144	1.4141	3.3387	6.33494	1.4258	4.57603	11.7791	1.10332	7.11384	4.16313	1.07032	6.60911	3.99692	3.09044	4.898	14.0127	1.94454	5.01835	0.178993
TCGA-BG-A18A	6.43828	5.53718	5.29241	3.77794	2.27306	6.56475	4.61175	2.03973	4.38773	3.09337	3.54636	7.21	4.67632	3.5089	2.77929	5.34953	3.23467	1.12914	4.85591	7.19836	2.69613	11.7781	8.1745	14.1473	5.02246	5.28888	6.62293	2.58692	2.8649	3.76479	3.42561	2.13539	2.88783	4.45692	3.19261	2.01686	3.70117	3.82348	2.81613	4.4356	4.12322	5.30983	8.342	4.75622	4.19495	8.32708	6.44831	2.87723	0.211675
TCGA-BG-A18B	3.58492	4.42056	4.25398	3.91398	1.04209	1.59039	2.9351	5.10279	2.16515	3.87013	6.32056	1.98201	1.60817	5.01857	1.27438	0.0884944	3.83709	1.44489	1.17713	2.76652	3.53155	16.4668	3.94891	13.2232	7.03022	2.53332	6.9316	3.62522	1.55029	4.00933	6.49975	1.45841	3.27972	10.5106	1.22862	2.57692	5.31928	2.50614	2.75593	14.9382	2.47631	2.66081	8.09593	3.15893	6.79297	5.79649	4.1515	3.74422	0.132451
TCGA-BG-A18C	3.51588	3.75441	6.76735	5.04515	5.70213	2.18098	0.0942923	5.93105	3.2362	0.418702	2.5466	4.55529	0	3.46681	3.5581	0	1.62678	0.436542	0.422802	2.73028	1.92284	19.1807	6.90729	16.6971	8.49253	4.26067	8.32897	3.93289	2.32275	4.48544	8.16312	1.65487	3.79331	9.74311	3.67004	4.1004	22.3163	3.39512	5.38118	12.3396	5.46033	8.17128	3.72337	3.92775	5.70489	2.61162	2.06071	4.23503	0.124659
TCGA-BG-A220	3.95402	2.582	1.80039	2.92782	1.58028	2.46477	3.77881	3.49011	2.22294	2.51918	5.85305	2.60444	0.211531	3.80891	0.649896	0	2.37318	3.32706	0	3.4375	5.42817	17.9555	7.80524	13.1468	7.1548	4.73801	6.43907	3.9327	2.58019	3.34034	4.71616	2.11991	3.13736	6.933	1.59184	4.69477	10.2556	1.59553	5.14509	11.5914	2.42355	6.89753	13.4732	1.77867	8.86794	10.5962	1.77052	3.57829	0.0761156
TCGA-BG-A221	6.51481	3.2234	6.98381	4.47037	5.07704	2.39812	5.42615	1.83931	2.29968	3.99309	2.16985	4.21519	5.71588	4.01051	2.13779	10.6501	3.52317	3.77116	1.74993	2.4982	3.47459	9.43435	7.0911	13.6754	3.83156	4.15816	5.99038	2.24553	1.98471	3.16171	1.74668	2.02089	2.88691	3.384	1.92949	5.1846	5.98479	1.85893	5.06282	6.65119	2.21453	5.77469	6.0039	3.02053	4.45211	6.74637	1.73351	6.23894	0.265814
TCGA-BG-A222	4.15949	4.617	6.43053	0	2.7011	5.00153	0	2.87507	5.85955	0	4.98182	1.61252	0	4.54034	1.77743	0	1.62999	2.89762	0	3.46287	3.28051	31.1881	7.78458	12.2355	12.2627	4.82456	5.31493	5.3154	2.44636	2.89985	7.04596	2.03486	3.02842	8.92657	2.54881	4.54326	6.02508	2.66309	4.28529	11.7183	5.21094	7.46253	7.7597	3.48088	5.13575	5.59868	3.74582	4.56878	0.0175357
TCGA-BG-A2AD	8.08824	5.09121	3.5929	3.39071	2.4931	7.05998	4.12492	4.30246	3.89066	7.16427	1.80923	4.24251	1.73993	2.18992	5.42649	4.50896	0.847664	2.38703	2.71689	3.83936	1.94392	13.3817	10.8951	9.92351	6.1398	7.28133	4.35674	2.59854	5.3115	2.9185	3.65086	3.75184	2.27549	6.12943	2.88876	2.29788	5.35017	2.68761	6.93601	7.43681	6.74994	12.3552	12.2736	5.40185	6.08575	10.4968	3.57163	9.74415	0.147518
TCGA-BG-A2AE	3.92942	5.71094	5.54971	1.27004	1.99067	3.13297	0.408605	5.9782	1.52759	0.787163	3.00745	2.61947	0	3.28977	2.62601	0	3.74128	2.22655	0.0995343	6.67424	1.06626	45.3565	6.4309	13.0817	17.659	3.56325	5.99206	8.14638	1.84257	3.85446	6.99344	1.58806	3.55298	5.93844	1.74315	5.86531	3.37339	1.92413	8.97371	1.27696	1.78454	6.9251	3.68317	3.57987	3.57106	1.07167	2.59425	6.72888	0.0160388
TCGA-BG-A2L7	5.77073	5.01145	10.654	5.221	1.97699	2.72572	5.91725	2.07604	1.65743	7.20867	2.72002	3.15794	2.79318	1.17747	0.777701	4.00806	2.43483	2.17741	6.2016	3.95095	1.88177	8.55533	7.3665	14.9583	3.83283	4.45767	8.97075	1.79573	2.65309	4.57264	1.36009	2.096	3.20366	2.20499	1.11072	4.25135	3.50327	2.03318	5.45036	3.33751	1.02176	2.85126	2.69569	1.87006	7.97793	7.72153	3.31221	4.78178	0.393236
TCGA-BG-A3EW	3.47378	4.35672	2.19998	8.775	3.60287	1.55171	5.36453	2.91025	3.50613	3.30834	7.99482	1.56529	7.28745	1.41524	1.42613	4.21474	5.40238	0.574045	2.12751	6.31375	2.88928	11.9605	6.14572	14.4572	4.49007	3.63082	6.31089	2.00789	2.03397	3.76695	2.17922	2.1417	3.34997	2.5419	2.25466	2.45771	4.59199	2.68658	4.99289	8.45575	4.48961	3.43935	4.56952	3.6943	7.69712	6.499	2.27302	2.89317	0.299946
TCGA-BG-A3PP	6.31552	2.87177	4.79418	7.18807	3.85896	6.79739	4.14862	8.70812	5.56785	4.7806	1.48506	3.29036	3.67409	2.74187	3.7425	2.91606	9.6223	3.50848	0.71727	2.60353	1.21032	16.0915	6.91989	12.1536	5.92067	4.48831	4.80212	2.24885	2.21284	2.4962	4.71747	1.12232	2.06187	6.2564	2.05667	4.77075	12.1992	2.88254	2.32619	8.20824	3.12215	7.01362	7.57281	0.939012	7.55497	6.48801	2.3627	7.58012	0.169645
TCGA-BK-A0C9	3.57844	3.43603	7.64428	2.73812	3.63033	3.68369	2.89977	2.94011	3.63176	2.53282	3.2249	2.56265	4.44414	3.06738	2.17544	1.76249	4.07634	2.9647	3.03252	1.99728	1.93848	5.43866	7.21025	11.946	2.43594	4.17678	6.49559	1.34126	2.41362	4.41846	1.16611	1.834	3.13676	1.29248	2.21509	2.95462	1.74517	3.02943	2.44348	1.78003	3.23909	4.049	2.35011	2.94933	3.70034	2.93955	2.84977	4.5578	0.468982
TCGA-BK-A0CA	1.96673	1.78431	3.23444	2.33752	3.92005	4.63264	3.18252	2.88032	3.84591	3.20207	3.01058	4.27751	3.50373	4.09016	4.78598	2.70751	3.85285	4.8713	4.40773	1.73909	1.70221	4.69394	5.32013	13.6056	2.03807	3.3095	6.79664	1.1688	1.80607	4.33949	1.17031	1.80962	3.76579	0.985655	2.20109	3.51395	1.20258	2.44148	3.12365	2.69078	2.70598	3.4234	1.69919	3.46542	5.2843	1.99504	6.71898	3.98914	0.546771
TCGA-BK-A0CB	3.21346	3.43292	2.56545	1.35988	5.1923	2.01081	3.09477	4.60784	4.69228	5.61665	2.46733	2.92732	3.06196	3.41592	1.80881	2.72467	1.90501	4.37116	4.90307	3.50064	2.77802	5.46139	11.5138	8.98416	2.82561	6.44486	5.07476	1.98859	4.05484	3.7475	1.84527	3.31927	3.13939	2.58039	3.2089	2.35733	2.28619	4.72267	1.81994	2.36435	4.84736	1.79044	3.29195	4.77708	2.78949	3.2203	4.13208	2.99316	0.340809
TCGA-BK-A0CC	4.54372	3.28252	5.29282	4.56605	4.03026	4.86227	3.27522	1.14207	2.39729	3.36138	3.42843	2.70694	4.28959	2.87054	2.47309	1.9332	1.30328	6.04216	3.94774	3.60249	3.22815	11.2628	19.0816	7.1097	5.89025	10.0854	3.71785	3.17545	5.59595	2.24416	3.13509	5.50575	1.81615	3.54115	4.49757	2.56792	4.10802	4.12748	2.00557	5.18402	4.91912	4.97335	5.26011	6.22951	3.70616	4.69778	3.16921	4.60101	0.17207
TCGA-BK-A139	5.07857	4.63376	5.71909	3.18347	3.99473	1.95821	4.26577	3.43375	1.99233	3.00946	4.1747	2.05719	3.83108	3.77462	2.45	5.48436	3.53515	4.66943	3.47805	4.05473	2.93327	7.82362	9.4804	10.9338	4.46256	6.72189	6.20953	2.83084	3.58632	4.02314	2.01961	2.5476	3.14082	2.10767	3.82287	2.80306	4.35257	3.36406	6.1495	4.27525	3.3953	6.10816	5.22229	4.81187	5.75739	5.2319	4.04213	3.66783	0.297015
TCGA-BK-A13B	6.18849	3.57818	5.40892	6.18772	5.97025	4.43283	2.57306	5.13382	5.96691	3.53725	3.0411	3.09419	1.9911	4.23864	2.70815	3.57808	2.72495	1.84899	7.02575	3.61284	3.53521	8.10087	7.9565	14.5998	3.5135	4.80997	5.93637	1.84902	2.39505	3.56892	1.56172	2.59213	2.89486	2.10349	2.22854	2.81944	2.33815	4.75343	3.73792	3.641	4.17676	3.81236	4.20217	5.17972	4.49298	5.39159	5.02692	4.51849	0.340186
TCGA-BK-A13C	4.95067	4.91406	4.02845	6.80422	4.13636	3.65467	5.35793	4.98079	3.23589	3.05376	1.97571	1.63636	3.46591	4.18163	2.71144	4.00732	2.05805	4.69205	4.61463	4.075	2.60691	7.16307	6.38616	16.955	3.38586	3.78874	8.29344	1.92498	1.91266	4.44201	1.6878	2.09076	4.21312	2.46778	2.84734	3.2978	2.98283	2.18482	4.2403	4.10446	3.80756	3.78885	4.29603	5.32233	4.37755	4.38385	3.59325	5.92308	0.416964
TCGA-BK-A26L	1.42805	3.75131	9.12296	1.24675	4.30981	5.61998	2.91071	5.46326	4.73895	1.92129	2.9486	3.46432	3.40031	2.6312	3.13223	3.00547	6.64313	4.38048	4.23868	1.95736	2.25174	5.35383	6.74306	9.69914	2.97278	4.37885	5.5773	1.92414	2.61078	3.86883	1.94668	2.00005	3.51683	1.96808	2.06026	4.4395	1.99641	2.37118	5.92774	1.89955	2.8916	4.92712	2.85571	3.35716	2.36423	2.56861	3.08163	5.84657	0.365192
TCGA-BK-A4ZD	2.71515	6.17423	7.52244	6.71982	3.46875	4.08277	4.93251	5.08476	5.53619	1.96424	4.56857	2.32073	5.44436	3.5045	1.54278	2.35838	3.46552	1.84909	4.3849	3.17458	5.13534	5.96653	5.80759	13.1823	2.82899	4.47229	7.94013	1.71466	2.98519	5.26782	1.43911	2.25884	3.17864	1.03278	2.04452	2.62315	2.10196	2.88067	4.41136	1.77759	3.53113	3.09056	4.11145	2.73953	10.4934	2.65884	1.72257	6.33872	0.464153
TCGA-BK-A56F	3.26313	5.60273	6.28039	3.20143	5.0584	4.26906	2.5949	4.42369	2.92715	6.21115	2.96602	3.90768	1.8132	2.97855	3.63131	8.54387	4.50249	1.88122	3.81225	5.47017	0.00138009	7.22861	6.14849	14.2783	3.1845	3.66633	7.45005	1.87051	2.45293	5.30976	1.2196	2.05457	3.61282	1.85188	1.77889	3.8607	1.97301	2.65546	4.76536	2.15099	1.55113	4.94144	1.38045	4.16874	3.45039	5.14016	3.91914	5.03332	0.429212
TCGA-BK-A6W3	2.85802	3.34202	3.04296	3.81185	1.76745	5.676	2.91382	4.2006	3.6989	4.60843	3.76777	5.83552	2.86388	5.29336	2.5992	3.17846	6.20908	4.93738	2.98742	2.56313	2.38366	7.44967	7.78358	9.58659	3.62938	4.97194	5.27289	2.27489	3.19152	3.14925	2.03169	2.77034	2.53466	2.24727	3.04202	1.32995	4.719	2.98573	1.35814	3.03544	3.26174	2.09516	5.89634	3.77157	2.75005	5.05156	1.88618	7.03758	0.271475
TCGA-BK-A6W4	3.57319	2.09085	2.66193	3.25703	7.42879	5.20369	5.45786	3.04816	4.25125	3.98081	5.32472	5.49029	3.83378	3.60254	3.43244	2.50685	3.01509	3.37846	3.17049	2.43925	2.5274	7.31771	5.76594	15.1077	3.26401	3.72309	7.36529	1.8265	2.27411	4.67894	1.61612	1.94515	3.84235	1.42497	3.59119	3.41551	3.57173	2.78633	4.99903	3.36851	2.69727	5.22728	2.07244	2.94742	3.85125	7.28519	4.42376	3.4783	0.439099
TCGA-BS-A0T9	3.92238	4.50487	3.30714	2.90989	3.31899	3.60188	4.10941	3.36394	1.65566	4.31162	2.17709	5.18701	3.07978	2.33898	7.38295	1.16353	2.58864	5.65785	2.44239	1.35695	4.63082	8.62049	14.2318	8.32597	3.72679	5.43386	3.73548	2.39691	3.01088	2.29234	2.62249	2.9771	3.11947	2.14137	4.78361	2.46611	3.55229	7.67449	3.95221	2.69751	1.95735	3.54148	4.87401	7.13469	2.14525	7.94263	6.30344	3.45172	0.204772
TCGA-BS-A0TA	6.35628	1.24894	5.01317	4.57282	3.32198	4.75537	2.76462	1.94138	7.34703	4.10244	1.56464	14.5463	2.62223	4.01807	6.72037	0.95918	2.5264	2.48205	3.29848	1.21301	1.67783	11.9981	21.7572	9.26057	8.06281	11.9267	5.48055	6.08437	7.92776	3.21911	5.01226	4.65036	2.47236	6.43696	8.28726	3.22592	7.76042	6.88515	3.77475	10.4821	9.82005	3.98303	8.51739	4.67567	4.817	5.44853	2.84174	2.6685	0.0977596
TCGA-BS-A0TC	3.68344	3.46691	3.74271	4.99764	3.33338	6.10499	2.34794	3.00845	4.13521	1.85116	2.82322	5.24805	5.19815	0.428349	4.39834	5.01732	1.73382	3.27364	4.7662	1.08536	1.37017	7.45678	20.5156	10.9283	4.12006	10.4664	5.62073	2.38024	5.10394	3.74352	1.93039	3.21929	2.15659	3.08511	4.18463	3.48388	2.12903	7.16534	6.06515	3.8486	4.10349	4.69184	4.43173	3.69109	6.7193	4.87718	3.45962	6.75583	0.320227
TCGA-BS-A0TD	2.94188	3.57029	2.99231	1.95037	2.88813	2.06956	5.873	1.34589	0.624184	1.46625	1.22337	0.698314	3.18768	1.15268	2.64616	2.31526	5.32409	3.22246	4.10368	3.99424	1.85556	7.79787	16.602	10.0807	3.43029	8.6808	4.57009	1.92819	4.19335	1.73902	2.03779	6.34893	1.91381	2.50548	6.23382	1.45573	2.18117	4.91918	1.56239	1.7343	5.85889	3.17644	3.77502	2.19206	2.00368	3.77482	5.73097	2.07418	0.315105
TCGA-BS-A0TE	4.05313	7.32627	4.61602	4.55573	2.51702	3.92292	4.96265	7.34798	2.04969	3.34938	2.8137	3.00471	3.94571	2.68596	1.79993	1.79405	2.64257	5.19562	4.38903	3.08547	3.04304	9.72942	18.0464	12.0121	4.94829	7.05159	5.54775	2.57234	2.8319	2.40485	2.39656	3.11309	2.59644	3.66453	3.79321	1.75584	4.0596	4.98894	2.95016	4.6579	3.98426	0.492565	6.2288	3.54243	5.63819	7.52235	2.93038	2.62312	0.295617
TCGA-BS-A0TG	4.83052	3.80432	2.32861	6.35848	5.12768	2.77267	9.03268	3.4801	4.88116	2.53317	1.1946	1.68723	3.76944	5.37107	2.89497	3.41765	3.14883	1.78628	5.68637	2.51458	1.09367	9.35834	8.68787	12.7012	4.90046	5.00151	6.7087	2.90585	2.91357	4.36912	2.27936	3.08219	4.44922	1.7724	5.57816	3.19394	3.44244	8.53096	3.40943	5.1691	4.59356	4.25019	4.86498	5.96937	1.86264	7.33091	5.12376	2.45122	0.246714
TCGA-BS-A0TI	2.22845	1.73604	4.51654	5.46615	3.15326	3.90865	3.54877	0.858242	1.03464	3.0651	3.24684	4.07992	3.15364	2.70985	2.08537	2.30006	2.55291	4.44776	2.0259	1.11248	1.12642	8.03001	11.8246	9.41644	4.38374	7.0155	4.41517	2.92897	4.23939	2.70365	2.33336	4.32071	2.19118	2.52502	2.67268	2.7125	4.02253	5.6865	1.31439	2.30415	3.29311	2.24462	8.01849	6.00479	2.68298	5.71999	2.81651	2.0591	0.277499
TCGA-BS-A0TJ	4.8201	4.69048	8.50319	4.86043	4.55144	4.56628	6.76581	2.74791	3.55847	3.29593	5.03613	2.72905	3.37675	1.25645	4.62758	7.77552	2.05608	0.736642	3.16913	2.29858	4.69807	7.64069	14.8229	13.9937	3.91386	7.54196	6.62091	2.2337	4.5507	4.10186	1.88467	3.63864	2.35731	3.15589	3.23584	2.48078	3.88427	6.65917	3.63259	4.17204	2.39738	9.16212	4.65183	8.96292	5.75323	1.4691	3.25095	5.01401	0.346705
TCGA-BS-A0U5	3.77389	2.42511	2.56224	1.69883	3.394	5.39463	2.14008	4.54263	4.99441	5.33503	4.03675	2.88485	1.1898	3.52758	2.91771	0.928513	2.5589	4.46251	3.27106	2.58137	2.52377	4.89769	8.96891	10.7846	2.23962	4.83285	5.8138	1.25776	2.53662	4.08544	0.811918	2.29003	3.07411	1.25416	2.64788	3.17858	1.03205	3.1941	3.9923	1.53947	6.2165	2.6018	2.38882	5.1209	4.01125	2.67996	5.19073	4.87044	0.441114
TCGA-BS-A0U7	5.30893	6.26897	1.22843	3.87528	3.97423	1.19446	6.3362	4.78652	1.24478	2.1049	2.84293	1.99014	2.80689	0.85716	5.79591	1.96334	3.06151	4.47042	2.50001	1.9067	5.5919	6.22207	12.0363	9.99438	3.13619	6.76151	4.37736	2.12175	3.71702	3.02561	2.32805	3.83331	1.56383	2.73549	6.53296	2.29561	1.66452	4.21682	1.79823	4.42733	8.16975	2.7308	3.79933	4.53793	0.742285	3.61792	3.31175	2.0078	0.246981
TCGA-BS-A0U8	3.50823	4.10306	3.71416	0.874578	5.86004	5.46831	4.3665	4.5967	6.05162	2.29055	3.70573	3.85644	4.87864	3.37853	4.99217	2.5929	2.45081	4.94401	2.66647	4.20891	6.0914	7.96524	8.9332	16.9848	3.17957	4.69926	6.78982	1.48868	2.87649	3.57854	1.43549	3.70825	3.26652	1.39034	3.95699	1.89378	1.43692	5.71125	1.92849	2.47708	2.43557	1.62946	1.41776	10.438	4.90739	3.00774	3.97582	4.4246	0.433447
TCGA-BS-A0U9	4.86704	5.86568	2.46773	3.74016	2.97951	7.06784	5.06641	6.24008	6.04514	2.76791	3.19353	3.53183	1.37721	2.23563	2.72112	6.55856	2.76969	6.46307	5.04749	1.92705	3.38995	6.80977	10.2049	13.685	3.62417	7.11605	6.85362	2.42344	5.34176	3.80013	2.34744	4.82559	2.98542	4.28968	6.06092	3.38791	3.52387	6.0485	2.80681	4.62787	10.1955	4.55646	4.98197	6.2189	3.38913	5.74765	4.87256	4.11754	0.324739
TCGA-BS-A0UA	4.51553	2.1871	5.19367	6.67529	1.17856	3.14136	2.45702	2.52617	2.51771	3.86729	0.732114	3.80627	3.77585	2.8839	1.69555	2.77584	3.96168	1.52945	5.38823	2.62507	1.72873	11.638	14.6515	20.7006	4.49648	7.43747	8.83649	2.31001	5.15839	3.69463	1.9138	8.96957	2.43478	2.25276	9.39047	4.12889	2.86177	7.74644	6.49177	3.8481	8.61187	4.54595	3.13162	1.99662	5.63145	1.49341	4.46235	4.40628	0.303699
TCGA-BS-A0UF	1.20427	1.77242	3.30609	3.45429	4.05694	2.65777	1.76225	1.00053	3.08504	1.80015	3.18591	3.02882	1.93094	2.61003	1.09181	5.73689	2.37295	1.91825	4.73496	2.14807	1.47079	7.28118	13.9382	9.48622	3.2908	5.25891	4.79293	2.01103	2.2645	3.04414	1.98644	1.7523	4.47192	0.839409	1.3778	5.16806	1.53864	2.16501	4.32445	0.822894	0.900552	4.57002	1.728	1.67586	2.94692	1.34746	1.58764	4.59103	0.385541
TCGA-BS-A0UJ	3.23438	4.91547	3.74583	0.758864	0.972323	7.27459	4.31513	3.18597	2.69065	2.07406	5.56372	0.425484	3.53833	7.16199	3.82795	1.85286	7.24271	3.10421	1.91199	3.56087	1.79949	4.54446	7.62174	12.8878	2.30389	4.62637	7.42864	1.33331	3.17074	5.06179	1.51344	2.21476	2.70098	2.4946	4.59893	3.60441	2.06992	6.25596	2.13315	2.11188	3.70967	2.67971	2.24317	5.54571	6.91179	2.67507	4.5319	2.63437	0.431512
TCGA-BS-A0UL	5.49616	3.31408	4.07594	4.39542	4.32575	6.30329	4.2242	1.31545	3.17232	4.30419	2.47229	4.11449	6.16958	3.42126	1.4211	2.87972	1.14978	1.48158	2.49248	0.857099	0.473692	8.26293	23.0783	9.0915	4.13768	9.91463	4.74086	2.5592	4.37041	2.74559	2.51463	4.28253	1.67439	2.72668	4.78334	3.13432	1.58196	5.47666	5.16731	2.63639	5.18124	1.74971	1.97848	4.38706	2.72634	6.04047	4.76971	5.38006	0.250598
TCGA-BS-A0UM	4.18181	4.26936	4.34677	4.25745	4.74265	2.0673	5.50774	2.91371	6.08189	3.22428	4.34102	2.20744	4.35619	2.30189	3.50942	3.92056	2.34469	0.955724	4.62303	1.41777	1.09428	10.7669	15.9345	13.0627	4.67726	8.11067	6.87536	2.35288	5.46659	3.81746	2.65478	5.77375	3.60646	3.26519	4.86379	4.18962	3.07428	5.66209	2.19156	4.03038	4.68901	3.13179	2.32508	3.22738	6.24293	5.04507	5.25324	3.38633	0.272427
TCGA-BS-A0UT	1.40325	5.31563	1.43185	2.27427	4.89005	1.64636	3.40069	2.9454	1.57084	3.51811	2.48202	3.84282	3.21294	5.69371	3.17871	5.86519	4.17337	4.42763	2.2102	1.00729	2.65942	4.17111	6.56724	16.8561	2.2369	3.87483	7.69026	1.25985	2.01782	3.94315	0.974474	2.19211	2.82541	0.958829	3.6044	3.1987	1.60143	4.48754	2.68943	0.830394	5.21727	2.90242	1.5887	6.97847	1.93505	4.03811	8.23852	3.74649	0.541012
TCGA-BS-A0UV	4.88948	6.21854	1.3452	5.42862	4.50934	3.69486	4.65259	2.70124	3.18518	4.54289	2.67135	2.19316	4.10677	2.96621	5.08844	0.986127	3.00387	6.3796	3.23518	1.41613	5.29265	7.17884	10.9085	12.1349	3.79332	6.5679	5.96034	2.07623	3.85655	3.62761	1.88339	4.26174	2.5972	2.64275	4.77458	2.00109	2.99673	5.6676	1.61552	4.66443	5.92502	5.27463	5.04099	6.00761	4.77731	5.15249	4.85512	2.44151	0.303013
TCGA-BS-A0V4	1.4109	6.78833	1.27605	2.06831	2.71994	3.24672	0.67	3.21323	3.64477	3.55045	4.32549	4.9121	3.37628	2.13712	0.808599	2.1985	2.66543	2.18847	2.45871	2.39747	1.99078	4.85526	10.5466	7.82751	2.26572	4.79746	4.53638	1.64276	2.75175	3.63241	1.47726	2.16733	2.62688	0.989247	2.9642	2.30937	1.41104	2.08013	3.6405	1.02294	1.97504	2.32077	2.49326	4.30598	1.99841	3.38057	1.6894	1.55253	0.319714
TCGA-BS-A0V6	3.33168	2.82822	1.66018	4.87966	2.09089	2.04612	1.71235	3.08043	3.94627	2.61783	4.23234	5.14405	2.20798	4.80806	6.04842	3.1492	5.14215	4.73944	1.67388	4.87359	2.43786	5.16837	9.00972	9.28656	2.85132	4.69709	4.87958	2.44085	3.09689	3.41742	2.0509	2.12878	3.1791	3.12114	2.2713	3.42015	3.32912	3.29852	3.13796	2.3122	4.46005	2.35184	2.66078	3.0042	3.00689	1.54349	4.30391	3.1962	0.297116
TCGA-BS-A0V7	7.9334	5.24604	3.30159	6.65295	7.43244	3.53456	3.4622	0.767143	1.75836	5.26423	3.55727	3.93147	8.322	6.73189	3.14985	8.16529	4.42181	5.57989	3.01382	2.29535	5.34049	5.17963	8.58664	9.35431	3.46462	6.58253	4.19549	2.91755	4.99265	2.92046	2.11432	5.11925	3.45796	2.95223	5.96789	3.18413	3.63374	8.77747	3.51237	3.77612	5.18787	3.95567	3.9607	3.48677	2.28544	7.10095	6.86722	2.80536	0.242178
TCGA-BS-A0V8	4.87534	5.79511	5.34489	5.97549	3.28095	9.24454	2.46413	4.73816	4.02846	1.41672	2.9626	3.16881	2.96848	3.12824	5.57361	4.18604	2.35251	0.937433	5.0381	4.61803	2.36447	4.98416	8.76028	9.2916	3.09687	6.04589	5.25204	2.51132	4.18473	3.57751	2.38857	3.78416	3.46952	2.25947	4.69442	2.41984	2.07189	4.72997	4.00771	3.17747	3.15086	4.51415	3.2165	6.00352	2.31471	3.94156	6.4597	4.02701	0.319543
TCGA-BS-A0VI	3.2338	5.2936	2.50832	3.10865	4.01026	0.716686	4.71976	1.82195	1.00339	5.06743	2.55996	6.09622	1.50282	2.58466	5.57273	0.959562	2.98943	6.00191	5.70458	4.0422	3.40644	6.64198	11.9292	9.38144	3.8494	6.86876	4.17373	2.33357	5.05945	3.10962	1.99083	4.0184	2.53748	1.69837	6.08263	2.15807	1.70831	5.31306	3.17985	3.16913	5.82721	2.2341	3.47209	5.814	3.69877	7.64267	6.72616	4.32816	0.254575
TCGA-BS-A0WQ	5.03267	4.79049	4.52327	4.37908	3.67849	1.67945	5.32769	6.70456	4.47527	2.25979	4.43447	1.03737	2.97656	4.96832	1.52107	3.56731	2.65862	1.82914	2.29994	5.45034	2.2171	5.4767	6.36584	14.7943	2.54697	3.71003	8.14102	1.51223	2.74804	6.00943	1.25135	3.22642	4.31074	1.3589	3.74411	4.28633	2.52701	5.66531	3.70467	3.80374	3.52552	4.69958	2.37802	6.70561	3.23793	4.20281	7.5004	5.32408	0.441808
TCGA-D1-A0ZN	3.06364	2.99427	3.56113	3.43565	6.51967	7.32012	2.69784	3.89977	7.16076	1.28811	2.54876	6.48128	3.47546	1.84422	4.02298	3.98642	0.78588	2.35128	2.09572	3.48301	7.57086	6.89785	10.5404	11.8198	3.0516	5.49003	5.86661	1.90262	3.16273	4.17498	2.23908	3.90926	3.66342	3.46416	4.32841	2.86102	2.5216	5.56204	2.2177	3.42548	4.40537	2.5003	2.58696	5.75956	2.5867	2.46486	3.13477	2.85763	0.342128
TCGA-D1-A0ZO	2.3444	2.16528	4.58645	5.59793	3.51778	2.28906	6.39119	1.61196	1.65323	4.00153	0.667174	2.66515	3.06988	0.890797	1.79624	4.20398	2.81731	6.69362	2.13777	1.13598	0.822883	11.4868	13.4655	12.2768	4.85454	6.7704	5.09368	2.65549	3.22659	2.75554	3.34926	2.92741	2.17116	4.64615	5.92733	2.33863	6.08385	3.6997	4.10237	7.47592	6.3021	5.18194	5.1531	2.04361	7.19303	7.27854	6.19721	3.04192	0.212426
TCGA-D1-A0ZP	4.81253	4.38252	4.9622	2.11199	2.51119	5.09024	2.81836	3.65135	4.67105	3.86769	3.60113	5.37796	6.71093	3.8314	3.06631	4.78515	1.7842	2.89255	6.19918	1.84284	0.59569	8.11575	8.15027	13.3394	3.22302	4.39987	7.87868	1.42139	2.63898	4.08591	1.29892	2.91586	3.41379	3.0357	3.73633	3.90149	3.37022	4.83783	4.10546	2.83561	4.25712	5.47307	1.71368	5.43632	4.96694	3.04586	2.39022	5.19905	0.360734
TCGA-D1-A0ZQ	3.24416	3.9653	3.61262	2.7247	2.50361	3.06705	5.78385	1.28482	3.76406	5.39558	2.67791	3.38828	2.54114	2.1809	4.13837	0.497853	1.40334	1.72098	2.82899	3.7016	2.87898	7.21563	14.364	9.85397	3.46915	7.80435	6.26193	2.03353	4.57137	4.70626	1.68637	2.89946	5.65006	1.61892	2.31273	6.0278	1.5032	1.56844	6.06814	1.24635	2.08789	7.57857	2.22801	1.51158	4.23024	2.80968	1.57093	7.64699	0.395327
TCGA-D1-A0ZR	5.43182	1.17879	3.89358	3.73207	1.29169	0.824825	3.15998	1.0305	2.53405	5.85532	4.2505	2.29101	7.06662	2.29735	1.59264	1.80741	2.97803	2.27179	4.81993	2.52701	0.762855	10.6337	14.6324	8.22691	3.36721	4.66489	4.10005	2.34917	1.6388	3.25187	2.05403	1.39659	4.46289	2.39274	0.999373	4.52013	3.9712	1.38478	5.15409	3.20713	2.0161	3.99629	4.34651	0.977	2.03825	4.20985	1.09086	6.17632	0.06613
TCGA-D1-A0ZS	2.06173	5.21684	3.73334	4.62365	3.9094	4.21097	4.74554	2.95907	3.01917	4.83175	5.69957	1.47012	7.63085	6.59428	3.9398	3.66623	4.87899	0.87734	5.23899	2.89554	0.953705	8.84527	9.96289	12.0973	3.84597	5.51765	5.66571	1.85837	3.26013	3.61303	2.07419	3.19159	2.54734	2.67374	4.68722	3.50274	2.30828	4.60675	4.67222	6.36495	3.22467	4.60599	3.01759	4.00092	5.27109	5.43027	3.01172	5.32089	0.335657
TCGA-D1-A0ZU	5.99333	4.25155	5.53019	5.85228	4.18823	1.94187	6.03136	0.796352	2.97162	4.44089	5.77084	4.97744	3.48721	4.82528	6.36094	2.27054	6.042	1.34414	2.82389	2.08696	3.88414	7.3478	8.23992	12.6854	3.50201	5.04897	5.84757	1.95224	3.15114	3.14478	2.03133	2.60296	2.73715	3.00995	4.08015	1.853	2.56802	2.65596	2.54247	4.75274	7.10252	3.13899	7.19374	6.4348	1.27426	4.63968	3.63292	2.18712	0.394097
TCGA-D1-A0ZV	4.12243	2.91084	3.19943	4.60921	4.08299	3.50941	2.77813	2.05149	1.78209	2.57431	2.90287	0.731081	5.51931	1.63492	2.98043	5.01511	3.90275	1.99124	3.52232	0.336393	0.134727	10.1931	20.2664	13.7251	4.83208	11.3148	6.92095	2.94002	6.05918	2.52079	2.35179	8.73567	5.21157	3.1603	5.4059	4.29507	4.3754	6.22923	5.764	4.82281	3.90534	7.64223	5.35564	2.71444	3.92763	5.5676	2.71596	6.00307	0.336003
TCGA-D1-A0ZZ	6.68216	4.06839	1.13967	5.25822	4.62929	2.30456	2.82397	2.86066	2.79237	4.31027	3.93807	6.18478	6.63242	4.58004	1.79608	4.74534	1.65818	4.17161	1.83099	2.81202	1.99934	8.08993	10.1818	11.3628	4.31329	7.49296	6.9207	2.97806	5.46051	4.63329	3.10384	4.9884	3.43307	2.83686	5.91402	2.77595	3.80282	3.77081	5.17545	2.06378	4.19199	6.20805	2.42307	5.6774	5.05296	4.93662	4.07562	6.84212	0.308092
TCGA-D1-A101	4.76743	1.37994	5.03303	4.61514	2.26184	3.25364	2.44321	1.94093	5.47382	4.21237	2.40954	1.21628	4.58454	3.04848	3.32927	2.24351	2.89568	3.20584	1.70643	4.94472	2.11091	7.97984	11.8563	8.74624	3.35652	6.24566	4.73399	2.37447	3.68764	3.68852	1.70189	2.84842	2.97812	2.34177	2.61186	2.35497	3.50654	3.19949	2.84099	4.23417	2.99253	4.14706	3.2363	3.11588	4.56817	2.52655	3.82765	4.69996	0.316248
TCGA-D1-A102	4.51775	4.67554	1.4807	5.5576	3.58636	3.54759	5.85384	2.86587	3.27794	4.86555	2.38149	5.80879	3.25964	2.73846	4.62017	3.29185	1.90481	3.81894	3.69348	4.20936	1.44601	8.09498	12.4854	9.71509	3.98072	7.47866	5.08559	2.47251	4.54937	2.97766	2.62712	4.53043	1.9016	3.91807	4.52287	1.48117	3.44295	4.40266	2.25876	3.83791	3.20972	2.27028	4.60709	2.80396	2.97267	5.05765	6.30441	1.61853	0.261406
TCGA-D1-A103	3.96151	2.38818	4.15742	4.91202	2.03541	2.43163	3.59919	3.36645	4.09434	1.44277	4.41716	1.9931	3.92774	1.66607	2.33884	4.86302	1.77146	2.12591	4.82641	1.06794	1.62816	8.6995	26.6967	10.0707	3.45863	12.452	6.25895	1.61095	3.96456	3.18639	1.37107	3.97304	6.29416	1.27113	6.0844	11.2871	3.3925	2.56899	6.48983	3.29165	2.68533	10.3154	4.95346	3.83392	5.7919	3.201	3.67354	5.90073	0.361919
TCGA-D1-A15V	4.58816	3.53469	3.22602	2.1202	1.72502	2.08513	2.87446	4.34885	4.31317	3.59571	2.10157	0.982645	5.72108	2.63491	2.2074	3.66364	4.55383	1.48545	1.47438	1.63907	0.711549	8.51937	16.2907	12.6887	3.4779	8.07215	6.73739	1.60175	3.82938	3.51166	1.55509	3.2987	3.7743	1.39712	2.59862	6.20074	1.69878	2.33969	5.9686	3.64216	3.83383	6.89304	4.30323	5.08531	4.7701	1.25018	3.14428	3.9831	0.397744
TCGA-D1-A15W	1.62952	2.53007	3.15748	0.867852	1.32328	3.43423	2.98026	3.56803	5.39449	1.86109	1.62541	0.549415	4.80314	1.25169	1.43784	4.40742	3.60218	2.72439	5.00954	0.733294	2.24444	8.59923	15.5025	10.497	4.00621	7.45316	5.31944	2.05122	3.82258	3.27233	1.59157	2.13072	3.12842	2.16596	2.42847	5.25258	2.18144	3.40001	3.88747	5.59533	1.97473	7.46924	3.26184	1.79257	5.26326	3.76969	1.68636	4.40125	0.295716
TCGA-D1-A15X	5.36627	6.24351	1.92455	3.42855	5.5818	0.140666	9.67527	3.05752	2.94457	5.09581	3.61282	3.18055	1.62081	5.19173	0.70331	4.77595	3.69173	0.619864	4.98111	1.94981	0.908048	9.50734	12.2088	10.8542	4.87155	6.75096	5.29342	2.82802	3.78221	2.54239	2.94249	4.30578	2.26967	3.92371	4.39669	3.65509	7.59983	5.85946	1.95409	3.49749	7.03324	6.99946	11.3288	3.00437	1.81247	2.29552	4.9991	2.86226	0.206631
TCGA-D1-A15Z	4.56056	3.67847	4.81258	8.26025	2.17775	4.28577	3.78002	11.484	4.00175	2.67744	3.99276	2.3606	4.77939	4.77125	5.12685	1.66276	5.00868	1.8167	0.0799461	0.201711	1.50361	11.1923	8.00272	16.2215	5.02514	4.52635	6.96976	2.6944	2.30981	3.53362	1.37248	2.50377	3.44406	4.51875	4.5388	4.87439	4.68148	5.60978	4.27824	5.85672	5.8047	4.49512	7.25232	4.71733	4.49253	5.18938	5.16317	3.01788	0.231847
TCGA-D1-A160	2.85503	7.79661	8.26512	2.51497	2.40837	5.17501	2.92665	4.57374	2.81943	2.52577	3.90789	4.51854	3.39492	2.38502	1.89628	0.946058	5.16859	2.79399	3.98357	2.68938	1.95096	8.75034	7.21914	15.3512	3.96055	4.43082	6.16438	2.20247	2.27724	3.56247	1.46427	1.93341	2.45405	1.72404	3.56678	2.50806	2.67504	3.98544	1.88584	8.02	5.53251	2.46975	5.79888	0.881929	3.46282	3.65637	2.71709	4.08102	0.338899
TCGA-D1-A161	2.82153	6.36939	6.20417	3.42943	3.85679	3.55962	8.4799	6.90762	3.02956	5.53773	3.55414	4.69192	2.83652	2.29793	4.94085	2.83631	4.36222	4.22838	0.455261	4.77352	3.57273	9.15197	9.60876	9.72686	4.04089	4.9177	4.83244	2.61271	2.51929	3.81143	2.08877	1.63611	3.32149	1.77113	3.25875	3.56189	3.73487	4.53399	3.47691	3.31151	3.60959	4.05408	3.91227	3.73426	3.89358	4.2103	3.69855	3.69026	0.224557
TCGA-D1-A162	5.91152	4.55417	3.73094	7.58843	3.33081	3.50879	2.13613	3.7304	4.10438	6.58251	4.5768	2.96797	1.95062	7.4151	5.68434	7.02185	3.30441	6.62999	3.08634	5.26853	3.34124	10.4716	7.26627	10.7131	4.71316	3.6356	5.23975	2.3345	2.13741	3.62961	1.88067	1.59713	2.2843	3.38321	1.13035	2.09434	4.77623	2.76059	1.74267	5.11862	3.41199	3.44818	4.0153	3.60563	3.20131	5.05234	3.51893	5.28914	0.207724
TCGA-D1-A163	4.50812	4.85915	4.11232	4.00431	3.45334	4.62522	3.19921	4.80128	2.31922	2.11823	3.67138	2.14624	5.00306	5.06568	6.33516	3.65022	2.69515	5.66007	2.49227	4.79565	5.38247	8.78386	7.73391	12.6208	4.95436	4.873	7.07149	2.68093	3.60813	4.2708	3.4292	2.8334	2.1186	4.01249	4.84747	0.850995	5.00186	7.58052	1.45248	6.55578	6.15929	1.58644	4.95202	6.64722	2.97893	8.13085	4.09269	6.64129	0.269488
TCGA-D1-A165	4.38547	2.45003	5.12399	6.24517	4.81604	3.50518	1.64341	2.96532	2.38528	3.71325	2.22192	2.60909	5.95397	6.06189	3.89882	3.89378	1.47263	2.15429	5.18463	3.47124	1.07196	6.73176	6.34688	13.0967	3.65062	4.31355	9.20967	2.20621	2.22512	6.33812	2.21176	2.71133	4.22295	1.565	3.44705	6.14798	4.05382	6.15519	5.47118	4.65685	4.23844	6.95011	3.65222	7.15164	4.23475	4.15482	3.89094	2.62501	0.374394
TCGA-D1-A167	4.47583	3.14374	5.83821	3.7258	1.84109	2.56409	3.72476	4.98901	0.63193	5.60641	4.64709	4.11146	4.39086	7.84606	2.34925	5.55567	2.80966	6.37824	2.4753	2.44909	2.98008	9.0484	7.5585	12.8318	3.71089	3.94011	5.99048	1.6882	2.04904	3.84864	1.94363	1.49266	2.46397	1.81299	1.34657	3.62498	2.68106	3.1914	5.94054	4.49092	2.13234	4.88922	1.67841	2.11604	4.40323	4.88734	6.67873	6.49443	0.35749
TCGA-D1-A168	1.16775	3.19022	4.62908	5.83016	2.02507	4.6896	4.82045	4.85374	2.29929	1.97091	3.34645	2.80642	1.23868	4.47631	2.66143	0.767663	2.35838	1.12683	2.42303	2.54971	4.94186	8.66588	10.5279	12.1829	3.92843	5.25434	5.48475	2.03692	2.69348	2.94753	1.36155	2.80643	2.41578	1.98861	2.89702	3.47762	2.71994	3.9867	2.07246	2.22229	4.48971	2.54599	4.26101	2.9997	6.04567	1.80148	3.7748	0.807917	0.332146
TCGA-D1-A169	3.89767	5.93263	3.9336	2.86783	7.39103	8.1444	7.31872	3.77256	2.03308	7.3697	3.18334	3.6912	1.16557	4.40647	0.504937	6.24581	4.91374	6.34677	5.44245	2.30089	2.90101	6.90545	9.823	14.4614	3.1927	6.13605	7.07986	1.70876	4.04394	3.91421	1.66473	3.37165	3.09109	2.11509	5.20461	2.60988	1.88607	5.19792	4.37618	2.89312	5.00377	3.77742	3.73599	6.88783	5.40885	3.11164	5.29029	7.81011	0.447528
TCGA-D1-A16B	3.42439	2.88312	5.73304	5.57256	1.73556	3.9898	0.80314	1.79218	2.6047	3.03932	6.65641	2.08284	3.81176	2.88291	4.02166	3.44569	0.657387	4.22286	3.12187	3.50004	2.38092	7.06173	6.91347	12.7144	2.98066	3.41826	5.9757	1.83112	2.33956	4.89312	1.58479	1.97757	3.44837	2.30772	1.81715	3.3018	1.82384	3.28166	3.04456	3.83965	2.59906	3.89636	3.37224	1.92132	6.18796	2.92494	3.3801	4.82215	0.34273
TCGA-D1-A16D	2.96718	1.51512	3.93309	4.50485	5.98778	2.46694	2.30675	5.03308	3.04963	2.34961	3.02323	8.42074	1.85206	2.64281	4.27313	4.23042	2.65745	4.71417	3.27296	8.14168	3.98852	7.66301	7.25346	14.4058	3.12307	3.48358	6.34362	1.8323	2.08239	4.03177	2.14403	1.67025	2.8312	1.95397	3.79022	3.35283	1.79707	3.76153	4.76885	3.99074	2.61592	2.6698	4.19267	3.94881	2.13885	4.13459	5.61241	1.59013	0.326494
TCGA-D1-A16E	2.35766	2.4153	3.66743	2.80006	2.93206	4.91341	2.85721	3.20693	3.10463	9.81668	0.768259	3.55096	2.85973	2.30598	0.933953	7.8742	1.65881	4.18559	2.00556	3.2479	1.97713	9.01311	23.8458	9.62011	3.90039	9.71153	5.28119	1.67636	3.61576	3.47355	1.28771	4.67355	3.12369	3.21986	2.97442	8.47259	2.7205	3.16577	6.57578	2.81427	3.59219	5.31782	2.8188	2.49458	13.0858	3.76762	4.2688	1.71657	0.33129
TCGA-D1-A16F	3.45384	2.24048	4.49097	4.18868	3.1276	6.80809	6.2507	4.20891	6.21279	2.796	1.33428	2.26649	5.45766	1.96629	2.00016	5.49185	3.47821	1.5922	4.02062	1.71	0.708455	7.55977	13.0477	10.3366	4.72222	9.3093	6.56576	3.38652	6.67351	4.28809	3.49763	4.87809	2.93273	2.86538	7.67267	3.36703	7.1585	5.7377	2.91751	6.1493	10.9012	2.49161	6.39233	5.08725	1.59093	5.29123	7.39676	4.97028	0.197673
TCGA-D1-A16G	3.41745	1.74236	3.93938	4.59648	3.74633	2.91401	3.08853	1.92675	5.63491	1.56646	2.71481	1.50594	10.1054	3.78012	2.04856	1.2236	3.30643	6.67963	1.14145	1.2682	0.250906	8.85032	23.0228	9.20689	3.88135	9.24836	4.74363	1.98289	3.04718	2.48469	1.29546	2.87682	3.2634	1.49978	2.57706	11.3337	4.22348	2.43016	9.19273	2.7107	2.55178	3.95793	6.19998	3.02374	5.58415	1.72628	4.55255	4.06328	0.333864
TCGA-D1-A16I	7.54944	4.01648	5.82687	2.6471	5.20552	4.30685	3.06163	6.77765	1.80219	5.3171	1.61897	0.680973	6.1972	4.05985	4.076	3.90234	3.75954	3.98792	5.26608	0.569941	3.59685	8.85164	10.9457	13.5015	4.16323	7.94667	7.42747	2.52567	4.39153	4.10355	2.73121	4.03911	2.96295	3.29579	5.0636	5.33166	3.34018	2.38395	4.36717	3.15003	5.24657	7.02364	4.7704	3.60437	1.94152	4.33832	4.6174	2.92757	0.266036
TCGA-D1-A16J	5.90652	3.64839	5.85997	2.63051	4.08343	3.98288	4.35998	4.61564	1.99946	4.88354	1.42524	1.5684	3.2659	3.42457	4.00476	3.68941	2.84332	3.03639	1.30915	1.96608	0.854942	10.5248	12.1836	11.4819	5.41166	8.94779	5.44519	3.86598	8.94491	3.44117	4.97515	6.93364	3.4651	4.16649	9.1279	3.8954	6.36081	4.65504	3.04742	3.87382	7.16443	3.42115	3.92911	5.22874	6.28315	7.38671	4.93033	2.43394	0.226975
TCGA-D1-A16N	3.39791	4.97628	9.0056	2.73003	5.99708	5.77118	2.61882	2.30422	5.18544	2.68118	5.52643	3.26952	2.3802	2.404	0.595773	6.50682	2.90582	2.8856	1.26922	2.75925	6.46121	6.08062	8.78191	13.783	2.79603	5.30724	7.4038	1.49542	2.83692	5.51419	1.33191	2.65733	4.27211	1.42649	3.22774	3.6372	2.27133	4.44165	3.07945	2.89786	3.76893	3.06789	3.90232	6.22228	5.9964	1.02397	5.32411	7.27296	0.426003
TCGA-D1-A16O	4.53334	5.54131	4.76636	4.10959	4.3187	5.21158	3.23424	3.90996	3.20733	4.92728	4.7392	1.93109	4.51289	6.34394	2.93532	3.5726	4.91885	2.17752	4.15497	2.19899	1.07083	7.77198	11.9354	12.2325	3.30792	6.98463	6.22134	1.8863	3.28634	4.13015	1.38025	2.00182	2.45085	1.64182	3.47634	1.72147	2.61959	2.8483	1.3981	4.21687	4.76274	2.39492	2.12638	5.86773	6.05474	3.00224	5.23774	3.23809	0.329901
TCGA-D1-A16Q	4.82762	2.09017	3.87362	4.00486	9.21923	6.13243	6.48208	3.49285	2.41738	3.83011	3.72709	3.169	1.65412	0.486203	3.06958	4.338	4.90514	2.6819	7.44402	5.33497	2.29665	9.85707	10.3551	14.935	4.33704	5.74383	6.04441	1.83485	3.17753	3.55917	2.02791	3.76352	2.01649	3.84117	3.65862	1.852	5.04355	7.82327	2.44291	4.34301	4.58666	4.07224	8.73834	3.27313	5.15291	6.28368	5.85171	5.03345	0.288865
TCGA-D1-A16R	6.84393	0.913827	1.64489	3.86428	5.75141	4.15394	2.86725	3.21906	5.72621	2.78434	4.70249	1.24463	3.19516	3.19965	3.97838	8.31209	1.43536	3.31382	3.38093	4.80101	2.41369	8.85602	7.61305	11.7712	3.67308	3.89764	6.22194	1.50946	2.07719	4.01348	1.44671	2.02424	2.57576	4.10622	2.3152	1.60833	3.98444	2.10325	2.57636	5.01311	2.66155	5.50092	3.51462	3.85377	5.11879	3.33748	5.1239	7.48306	0.291089
TCGA-D1-A16S	5.65412	4.34979	1.25964	5.07111	3.12369	1.90904	3.50661	4.8602	1.93117	3.69868	4.58735	1.69643	6.86295	3.1852	1.20223	4.97425	4.3983	5.32812	7.69069	3.35032	3.58523	6.97553	6.33038	7.35276	4.54035	7.14774	6.17407	3.54299	7.13927	4.80109	4.34809	5.34325	3.26347	3.95779	7.38867	2.67171	4.38714	5.67958	2.5497	4.40991	6.57737	4.80504	5.02463	5.87854	7.66201	5.30105	4.29162	5.52076	0.193301
TCGA-D1-A16V	3.7562	6.5089	6.20384	8.05516	2.24593	5.31877	5.6687	1.43928	4.72482	2.52292	2.06066	0.408305	2.67669	2.93319	3.2131	3.7321	4.39316	1.18425	3.19476	4.6459	4.28146	12.1585	15.9741	12.5302	6.30166	9.76209	6.02587	3.46316	5.56914	2.6021	3.08806	4.60416	2.44787	2.75483	5.07434	1.01953	6.35902	5.98415	5.37817	3.52531	4.07221	7.91411	4.35671	3.71843	0.918874	7.90749	1.52522	3.68223	0.170857
TCGA-D1-A16X	1.49259	1.41705	0.774262	1.16721	4.01248	2.65213	4.93689	2.31062	2.29173	4.87366	5.09694	3.67689	2.10739	2.60015	1.58882	2.95709	1.77789	2.50718	2.25755	2.26733	5.01603	9.22925	14.0611	14.002	3.75293	7.42739	6.82812	1.78753	4.09515	3.37738	1.87885	4.31409	3.23114	3.8334	3.57719	3.02933	2.60157	8.22031	3.01154	3.39982	4.82846	3.15266	2.72076	4.78854	3.47247	7.07966	3.96578	1.6619	0.297785
TCGA-D1-A16Y	0.855018	2.3371	3.39258	0.624181	6.09052	4.24351	4.00288	2.53078	2.51961	5.45712	3.01235	1.84892	3.4287	4.70271	2.90722	5.14232	5.66465	1.85352	3.13967	4.4858	1.68076	4.56853	5.86785	16.3138	1.8414	3.24406	8.05661	0.923623	1.98668	4.64126	0.774303	1.28964	3.35011	0.434502	1.58331	2.82455	1.24585	2.14873	3.93026	1.11718	2.57272	4.97782	0.865101	2.68722	4.46244	0.851869	2.06808	4.57259	0.591462
TCGA-D1-A174	2.2371	4.54091	4.26566	8.7355	4.33966	5.21234	2.47674	2.57763	1.31579	4.18131	5.38795	1.48769	2.42803	4.15888	1.855	2.0637	5.06434	3.3514	5.86812	3.7585	2.1968	9.65473	8.43854	14.196	4.31778	4.58155	7.4306	2.18828	2.55363	4.39451	3.51055	2.68479	2.81517	3.20388	4.80504	2.45128	4.93871	4.70449	1.47523	9.40115	4.44449	4.47397	7.42391	6.29553	5.54869	2.50311	5.83904	7.43285	0.291737
TCGA-D1-A175	2.45334	5.82581	6.09412	1.67623	2.92717	3.34101	2.18464	2.95952	0.571204	3.869	5.77173	5.73203	3.08633	4.6781	3.27556	4.15877	3.82903	2.9547	3.3608	2.90703	2.68099	6.47834	6.82037	12.2082	2.65066	3.36897	7.2073	1.43603	2.50379	5.43091	1.00548	1.73334	3.62371	1.21423	1.51877	3.21459	1.45203	1.43191	5.32835	1.86642	3.42149	3.71582	2.19638	2.6146	8.2893	1.69459	2.62225	3.56218	0.457038
TCGA-D1-A176	4.28149	2.36551	7.03027	3.90732	5.41914	3.95098	3.55847	4.78666	2.74504	2.26781	3.01866	2.00392	6.69206	2.65154	4.92055	1.82834	5.00174	4.88429	1.64734	1.16379	2.22849	9.68883	8.64533	12.7464	4.07365	4.7469	5.87578	1.92453	2.41892	3.62137	1.81742	2.85279	2.58073	3.05968	4.33966	2.38478	5.93918	4.31113	5.85316	4.48723	3.74625	3.39323	6.04861	4.02327	4.14772	6.65707	5.25962	5.20072	0.301569
TCGA-D1-A177	5.85304	2.15401	3.83671	3.674	4.29547	3.00859	3.71305	5.676	3.69897	2.99618	4.63365	1.37323	4.85055	3.37874	3.35781	2.45294	5.36153	4.57312	3.14124	6.15729	3.18486	8.90606	8.00834	11.1299	4.05814	4.6724	7.11916	1.95352	3.12631	4.68394	2.41713	2.66843	3.84266	3.71105	3.18448	2.9228	2.97872	3.51299	2.38594	2.26397	4.22389	8.0978	5.17822	2.41818	11.1632	3.46824	5.12056	7.33278	0.329184
TCGA-D1-A179	4.21509	4.19243	2.3426	3.31284	1.81812	4.06007	3.47422	2.13854	4.51903	3.88762	6.25024	3.64909	5.05928	3.24789	2.01049	3.43023	1.58342	1.6247	3.9044	6.56243	3.46946	7.96379	7.64441	14.3328	3.35622	4.75636	6.30882	1.76508	2.67769	3.07839	1.64909	1.98493	2.5981	1.45766	3.71593	4.59357	2.22943	2.87503	3.59042	2.84993	2.74321	3.34982	3.00308	6.05171	3.53045	3.11252	5.09595	3.42455	0.410176
TCGA-D1-A17A	3.0676	3.52381	6.57962	5.12874	3.39629	4.17589	4.85702	2.48741	5.83012	5.25044	3.94741	3.118	4.24567	4.3579	2.92277	5.92288	3.52075	4.32167	4.1434	5.18628	1.84864	9.54842	7.9137	12.2279	4.35472	4.45343	7.31423	2.58318	3.07799	4.50697	2.98736	2.6551	3.00462	3.06004	4.32237	2.70045	4.80252	3.34458	3.85344	2.99992	4.08795	4.3242	7.2354	1.6674	4.84853	4.26165	5.97176	2.99908	0.237394
TCGA-D1-A17B	5.2384	2.56205	5.98516	5.88603	5.38247	2.16855	4.80917	3.60214	2.88005	2.0736	2.14816	2.70811	2.74003	3.14196	1.37071	4.59426	2.70544	1.12484	5.07394	2.6193	0.0141684	8.69729	16.0055	9.97435	4.08761	8.58719	5.09162	2.14172	4.47178	2.94185	3.42494	3.68159	2.25388	3.83056	3.38546	2.42176	3.77731	3.39571	3.93113	4.40623	4.77697	1.01823	5.73059	2.98178	4.11587	4.99988	7.0346	2.7403	0.239824
TCGA-D1-A17C	3.94137	4.35366	8.14592	2.09996	4.22856	2.96813	1.91035	3.86752	1.947	1.30063	2.80718	2.61427	4.07806	3.45648	3.6101	6.18967	5.2023	1.26278	8.47281	2.30287	4.32418	9.18866	7.91375	13.4701	3.86803	4.26863	6.91455	2.1865	1.97398	4.01429	2.22283	1.46375	2.94315	4.39409	2.80502	3.73847	2.31919	4.20086	4.30887	6.53587	5.43309	6.46743	5.28496	4.25354	8.32744	3.84959	3.53638	2.08421	0.298548
TCGA-D1-A17D	5.81584	6.17501	9.41463	2.73614	3.10271	4.92455	4.70694	2.71864	4.77004	3.30264	3.71878	4.42186	1.33381	1.55983	2.39796	7.45844	3.73995	10.5127	1.31304	1.51266	0.515541	15.2175	15.502	11.4124	8.55918	11.0445	5.45232	6.36887	7.79979	3.0671	6.71477	6.86991	3.49427	8.07877	6.26455	4.83242	7.08481	6.5265	3.16092	7.7417	4.32781	2.61646	4.32164	4.76342	6.12277	5.59135	4.74674	4.61027	0.115131
TCGA-D1-A17F	3.30615	2.86175	5.38763	3.22747	4.5551	4.95811	1.99263	3.20466	2.99318	3.89504	4.07825	4.502	4.43394	2.92406	0.992055	1.98416	1.20889	1.47445	3.00655	0.768673	3.02814	7.37887	23.09	9.64226	3.63723	10.6027	5.21608	1.99968	4.62305	2.86559	1.7868	3.8622	6.06459	3.71468	3.53977	3.29506	4.78532	4.93339	10.7079	5.12613	4.59329	6.99989	6.24175	4.85699	6.2708	4.35908	3.56381	5.01062	0.330863
TCGA-D1-A17H	3.02639	7.27986	6.2512	5.87487	3.48687	1.40973	2.84413	1.19299	4.57117	3.84699	6.5152	5.79453	5.0333	5.17561	1.50481	6.15591	5.34965	4.4457	2.8499	2.26852	1.72326	6.78152	7.31415	10.3588	3.325	4.45715	6.26077	1.77656	2.90339	4.43734	2.72811	3.12238	4.74464	3.08386	3.6054	3.4872	5.20163	3.21988	1.66622	4.69564	2.98959	3.4804	5.45229	4.38959	2.55172	4.77561	5.07997	8.95492	0.32625
TCGA-D1-A17K	3.18098	1.1307	2.25717	5.56873	2.59691	0.963712	4.19719	2.72116	4.6946	4.81623	2.60224	0.710012	3.18684	2.15554	0.34991	4.47012	2.24327	1.1241	4.92754	2.57111	3.0316	9.21471	20.5523	8.00675	4.42566	10.8245	4.79838	2.63386	5.36999	3.38954	3.76081	4.80413	1.89866	4.54633	4.30927	7.2747	3.33102	3.41531	3.32629	5.31415	4.29689	2.62679	4.78666	4.90241	13.1696	2.88795	1.97541	1.39471	0.2525
TCGA-D1-A17L	3.73238	5.23319	1.20584	10.0181	5.38923	3.61299	6.81586	6.05926	3.28716	3.30421	3.00727	3.28337	9.08925	2.13224	2.44665	2.29811	3.19333	4.49644	3.58998	3.76603	3.55749	7.95511	8.45492	15.87	3.29144	4.45761	5.06903	1.46052	2.41921	3.47752	2.04559	2.68727	2.34115	2.82748	5.00032	1.24083	4.99193	6.68864	1.42716	3.21126	4.22949	1.19091	5.36036	8.05319	1.88336	6.38223	3.11114	2.23937	0.324993
TCGA-D1-A17M	5.096	3.23678	5.76044	4.51945	2.45304	4.24989	4.88678	1.87472	2.93583	3.99429	5.04795	7.26218	5.73762	4.17609	2.585	3.50237	3.15827	2.93347	3.32397	4.47089	3.32602	8.36662	9.76762	11.0661	3.81469	5.94777	6.20276	2.30937	4.30246	4.05774	1.26173	3.50654	2.93789	1.49506	3.12913	2.61777	2.47405	3.32992	4.85434	2.11387	3.34726	4.58309	3.30314	2.90606	2.74629	3.36657	2.46769	3.15129	0.324772
TCGA-D1-A17N	2.00253	2.95901	6.38658	4.88839	4.45801	6.56643	4.73709	0.87403	3.1717	2.90826	4.98627	4.15544	3.82639	4.56929	3.04238	3.56506	3.40002	4.3712	4.42235	0.761259	3.96809	9.31467	7.15254	11.346	3.92937	3.95284	5.60437	2.1896	2.38882	4.41037	1.81438	1.86116	2.72289	2.54971	1.70527	2.43001	6.91603	5.24668	2.88251	4.99591	4.92536	6.07602	5.17463	3.96119	5.23794	3.83604	3.51068	3.37111	0.252257
TCGA-D1-A17Q	6.71663	7.12444	2.54765	7.37891	3.95214	4.30511	5.46878	4.99957	6.48474	3.53509	1.58228	4.8457	1.88652	2.62112	1.64	2.07046	2.34485	3.03227	1.47339	3.26061	1.3386	10.4305	24.2747	8.76958	4.39867	10.7782	4.78018	2.25453	4.13511	2.71288	2.24177	2.48427	3.0129	1.84662	2.81828	4.0335	3.33899	6.74227	2.54855	7.27476	2.31247	8.31977	6.27363	4.53841	8.96644	3.96241	3.88986	3.10186	0.215325
TCGA-D1-A17R	7.35301	2.80527	1.88732	3.75695	4.02697	4.62361	2.95296	4.5214	1.69377	2.55977	2.88052	5.46133	2.79967	3.19431	7.31648	2.07872	1.14404	3.99078	0.0282111	1.28091	3.3675	12.1792	12.2374	10.9244	6.94122	9.62159	5.28748	5.11846	7.95404	3.8044	5.96645	6.90155	3.2004	6.65209	8.47527	2.54934	7.83548	9.04157	1.6418	11.4005	6.79823	1.27106	6.7482	5.51632	3.56598	5.23504	3.59645	1.12513	0.164837
TCGA-D1-A17S	3.23649	1.41717	4.66373	4.71686	2.98332	4.0395	2.74129	4.61568	3.28388	3.76177	5.28336	1.60254	5.34093	3.33249	10.3963	3.85465	2.82562	1.75955	3.79551	2.46108	2.97878	8.15531	8.25846	9.71221	4.1911	4.83455	4.68354	2.58427	2.998	4.01109	1.75042	2.22004	2.6338	2.86086	3.3021	2.8109	4.56756	2.31241	1.77706	4.41325	4.51453	2.47437	4.96646	2.51749	4.19393	5.45577	2.04686	4.37903	0.252721
TCGA-D1-A17T	3.51403	5.83775	3.14505	4.86777	4.31938	3.11412	4.77994	2.56355	5.97093	4.04206	1.59006	2.31024	4.85433	2.25904	3.38766	2.06374	3.35951	2.73506	5.35015	3.25179	1.30036	9.23583	22.4287	8.1405	3.93004	10.9415	4.51451	2.27568	4.2377	2.99674	1.85127	2.50561	1.89301	2.41055	3.55612	5.08678	2.26361	2.73746	4.57875	4.21187	2.21361	5.04499	3.16512	6.27651	2.83133	2.30319	3.0718	2.51706	0.254637
TCGA-D1-A17U	3.01835	4.98497	4.81898	3.90365	5.63866	4.48563	3.89694	1.81614	2.35727	5.4351	4.74045	9.24374	3.74745	10.9493	6.34282	3.8028	2.65387	5.20811	6.53376	1.2982	1.39292	5.44059	8.60049	10.5706	2.70286	4.77498	6.54922	1.42622	2.79946	4.76336	1.06747	2.24338	3.64856	1.67943	2.76948	5.03134	3.04977	3.38673	2.26881	3.05255	3.15348	4.01323	3.70674	4.68826	3.98462	4.09494	4.07289	4.3982	0.369323
TCGA-D1-A1NS	1.94032	1.92878	4.14657	6.09372	5.2173	9.66496	3.48645	2.8648	3.85849	5.39172	6.1719	1.84922	2.48124	3.61055	5.29167	3.46163	4.0301	4.4865	2.43958	5.04104	1.6179	7.85791	8.67621	10.3783	3.68879	4.3627	4.27153	2.29415	2.2174	3.28394	2.15474	2.03619	3.61293	2.81354	2.4352	3.58892	3.76629	2.26556	2.9109	3.68348	1.79319	2.65988	5.4908	4.64903	3.4565	3.63524	2.02193	3.35292	0.243545
TCGA-D1-A1NU	3.33089	6.86928	5.10511	4.67958	2.34265	6.1996	4.53348	8.29908	3.05871	4.29029	3.19454	4.60596	2.91036	3.15617	2.75033	1.65362	5.08447	2.67708	4.20104	1.42345	4.41484	9.30673	9.11686	14.3142	4.0208	4.79312	6.56304	2.20359	1.82536	3.64662	2.24818	1.86741	2.64184	4.26495	2.39256	1.80349	5.09824	3.32484	4.89845	3.29338	2.41964	5.04555	6.20828	6.07336	3.96254	4.40315	4.83373	3.75162	0.299476
TCGA-D1-A1NW	3.82246	4.62759	1.89981	3.16906	4.97241	2.20733	4.0049	1.66475	2.5585	3.38218	5.72503	3.33609	2.52657	2.80685	0.802052	3.27639	4.30356	1.75204	3.27451	6.56687	1.55378	7.35914	6.58689	14.0973	3.2132	4.46471	7.06108	1.74831	2.83025	5.3223	1.68177	3.15241	4.30844	2.91908	4.07257	3.90472	2.32333	2.47391	4.54036	2.17136	3.527	5.01043	3.89941	5.62678	8.52243	4.10051	3.84771	5.42879	0.444315
TCGA-D1-A1NX	4.58408	7.6316	3.40487	3.90713	4.84544	2.97445	7.10149	2.22012	3.24035	3.5001	8.52518	2.81923	3.13559	1.84292	3.55693	5.10424	6.52555	3.7032	3.27172	1.40622	6.09117	9.60178	9.13377	15.2095	4.62231	5.64889	6.93889	2.65383	2.82913	3.00359	2.24362	2.03776	3.30035	5.52518	7.00721	5.90088	4.6189	4.14432	2.99679	6.93997	6.79031	4.91065	5.37565	8.1093	5.70953	4.9412	4.71545	2.85322	0.288831
TCGA-D1-A1NY	7.93015	3.62572	4.4963	4.13001	2.75041	1.85541	3.82604	1.79675	5.15478	5.3287	2.76425	2.6838	3.03697	4.5108	1.79529	0.698995	2.71179	0.443953	5.99073	2.56885	3.98007	11.3727	17.5674	9.30484	4.392	8.44192	4.09034	2.28961	4.24363	2.07303	1.3685	4.639	1.83754	1.29752	3.70023	2.24269	3.94866	3.53554	5.76895	3.44863	3.3315	3.0951	4.7703	5.07866	5.8625	2.51878	2.99255	4.32018	0.196743
TCGA-D1-A1NZ	5.43318	1.71881	3.31145	4.09348	3.95709	1.40184	4.27661	2.65783	8.19838	5.7601	6.4759	6.29017	3.47702	3.49132	2.92223	4.13222	4.02792	2.51883	4.58777	1.10585	1.11427	9.95357	7.46846	13.2476	4.0829	4.34685	6.50339	2.16902	2.35432	4.62429	2.02842	2.26983	3.2338	3.88987	3.74389	3.25288	2.99929	3.26008	2.40868	4.34224	2.7816	4.34359	5.67499	6.2834	6.19249	4.49379	4.40073	3.03462	0.233089
TCGA-D1-A1O0	2.35883	1.75346	6.39495	3.25431	4.29517	3.26023	2.63471	2.31306	1.9431	4.9007	3.37639	5.68823	5.15902	3.02965	4.7766	1.8199	1.43858	3.76575	6.56929	2.5459	2.20939	6.80317	20.5016	10.5135	3.11382	8.13857	5.8802	1.66171	3.56124	3.50244	1.80062	3.39407	5.87893	1.94985	5.30708	6.84577	4.09631	3.74737	6.69147	5.07627	3.8503	4.16632	4.85202	4.78468	6.70683	2.94359	4.00938	3.41174	0.343994
TCGA-D1-A1O5	4.4389	8.20838	3.04429	3.3155	1.41979	1.04628	4.7312	2.96322	1.83789	2.56973	2.64027	0.98606	6.58142	2.08715	3.47034	5.15222	2.71921	5.04825	5.24513	3.25855	3.98428	9.51983	14.0283	10.0546	4.14922	6.87258	4.3107	2.2647	3.91948	2.97845	2.20725	2.45593	3.03013	4.04594	4.10319	3.29008	4.1107	3.42592	2.24941	4.9408	3.96629	2.63968	4.24712	6.45698	3.72949	4.03053	4.52871	3.82314	0.244561
TCGA-D1-A1O7	7.26437	3.37477	6.07724	2.45514	2.25391	2.98788	3.80471	3.34477	2.60799	3.9184	2.19481	3.05489	3.49333	3.84333	2.41287	2.2164	3.54751	6.00746	4.22132	1.72092	0.455118	9.03102	9.50626	11.4368	3.8837	4.99687	5.05866	2.13628	3.11999	3.44669	1.49281	2.86075	2.98987	3.35416	2.85993	3.62385	5.81677	3.16057	1.96911	4.58291	3.27284	4.76816	6.86425	2.48367	2.17679	5.41952	4.50867	5.57821	0.250658
TCGA-D1-A1O8	5.39545	3.62248	9.26405	2.14191	4.59172	8.40161	7.39133	3.05493	3.13726	4.63084	5.03615	2.19083	2.49498	2.52357	1.3442	2.89269	2.86987	0.960497	5.4832	5.61387	3.87677	9.97548	13.3407	13.4769	4.24655	5.7338	5.79383	2.23082	2.39392	3.70519	1.49288	2.08146	2.11107	5.61137	2.65714	3.01385	3.27223	2.01426	3.71866	4.03351	2.69142	4.00873	3.18132	3.92038	3.91707	9.91736	1.48899	3.36184	0.270329
TCGA-D1-A2G0	3.6691	6.31554	4.56362	3.52078	5.67391	2.51378	4.9884	2.65889	6.17306	2.33555	3.10841	1.4773	4.51934	4.56332	2.58749	2.4978	1.28457	4.47834	2.46945	2.72792	3.00401	7.79692	9.63687	12.5194	4.08313	5.29008	5.67515	2.13943	3.1614	3.68235	2.10979	2.90559	2.52479	4.09228	4.98926	3.17946	4.379	2.92252	4.37124	5.795	5.16584	4.09541	4.2347	5.35424	3.74983	6.12115	6.25118	6.43962	0.320223
TCGA-D1-A2G5	7.4645	5.59745	4.57782	2.84093	3.93419	4.38368	4.11241	6.97527	2.2635	2.32518	4.29478	1.2844	3.91112	1.56996	3.55919	1.85312	5.85803	5.42972	5.13994	4.11363	4.96175	8.01293	8.19415	14.9638	3.57497	4.64631	6.4054	1.7561	2.81506	3.68043	2.2893	2.04287	2.32549	4.73766	4.39391	2.91175	4.23305	2.9503	4.09596	7.06291	6.7866	5.05748	3.17305	8.02077	3.1024	5.75675	2.88691	4.68648	0.283102
TCGA-D1-A2G6	2.85505	4.04793	5.22488	3.32496	1.07217	2.73649	2.34214	2.83453	2.71815	7.27425	9.7096	2.6169	3.75379	3.50625	4.2029	3.05427	1.93464	5.30451	5.36093	3.38459	1.1553	8.28158	7.49385	16.8626	3.50124	3.80267	6.95808	1.85305	2.1484	3.5725	1.37412	2.62913	2.78841	2.49532	3.71148	3.48494	4.84938	3.58931	4.45537	4.6929	3.66092	4.63221	2.31422	4.09632	5.11484	2.93634	4.96325	5.83061	0.376159
TCGA-D1-A2G7	5.34358	3.54465	4.27852	3.88296	3.65635	5.05885	7.56525	5.74699	3.67006	2.14816	4.12247	2.21141	3.52181	1.36418	0.847563	1.78958	4.86299	4.62656	3.32533	2.40106	2.19435	8.05886	8.58164	16.1433	3.96811	5.62687	7.06324	2.24736	3.16806	3.4867	1.78884	2.80602	3.42556	2.35931	4.52734	6.43461	6.7626	3.13501	4.73622	3.75634	4.22437	4.13786	5.25473	5.88756	4.51681	2.77441	7.50621	8.60566	0.347974
TCGA-D1-A3DA	7.44635	5.43064	4.85313	4.12775	3.29503	6.19851	5.66481	5.21665	3.85956	7.7573	4.97479	2.45744	5.52181	3.33804	0.894263	1.22154	2.0303	0.821611	1.21514	2.01806	4.02451	8.68231	17.0247	6.8273	4.65076	10.1565	4.83824	3.01893	6.10755	4.21231	3.26959	5.26791	2.70364	2.92858	4.61418	4.22032	4.06579	2.35722	5.25889	4.07244	3.06668	4.37985	1.9684	4.72923	5.69344	2.24151	5.55533	1.78185	0.191695
TCGA-D1-A3DG	4.08928	3.44669	7.11516	1.68015	4.55141	3.98204	4.55967	2.49812	5.02007	1.44291	4.81032	3.54882	6.52851	2.10719	2.89855	11.1947	3.89414	1.17709	1.18643	1.8199	2.89222	10.2355	12.1999	12.368	4.60742	7.66462	5.79304	2.23955	4.91789	3.46445	2.16514	4.6387	2.12439	1.80097	4.31698	2.0845	3.76965	5.43197	3.04326	5.95654	7.53887	2.3686	2.83098	3.83892	2.79981	6.10247	3.76699	1.90249	0.315693
TCGA-D1-A3DH	7.42559	5.73572	3.35511	3.97824	3.77685	4.60424	1.24009	3.91779	5.99419	6.08743	2.99929	3.11529	2.88476	1.88904	5.01831	4.74504	4.19971	5.1248	4.917	2.48895	3.00555	7.99769	9.76963	13.357	3.7211	6.33089	6.4947	1.54195	3.84615	3.59149	2.21118	3.11125	2.3721	2.41133	4.62306	2.51838	1.85921	4.20598	2.0287	6.00481	4.57711	4.94809	5.2407	6.27919	4.86003	8.7118	5.55773	4.72925	0.384793
TCGA-D1-A3JP	8.83729	5.34719	7.73586	5.57883	2.15014	6.89045	2.17269	1.61979	7.67587	6.76616	1.98251	7.79092	3.35227	0.789728	8.91448	1.58297	4.72793	9.20071	2.04852	1.6104	3.50898	11.8248	16.1565	7.13414	7.24823	10.7719	3.27612	6.34463	8.1887	2.26974	5.39549	6.4018	1.49954	6.56464	6.60734	1.79176	6.57546	7.4607	1.79457	5.14587	4.61771	3.13775	8.34929	5.75551	2.59046	2.67293	6.14368	3.69685	0.0887331
TCGA-D1-A3JQ	3.36728	6.92067	3.56543	3.0327	3.06677	4.80659	5.25838	2.32244	1.76039	1.09939	7.85724	5.34741	6.61681	2.07752	1.57514	0.936015	1.19369	1.86365	1.47283	0.461519	1.2731	6.29718	8.8641	12.6273	3.17004	4.85536	7.28366	2.04279	2.84633	5.15784	1.6585	2.92282	3.95255	2.02996	3.93545	4.36785	3.43439	4.32875	3.51335	2.30069	8.22721	5.28875	3.79728	6.90807	3.71359	3.69924	4.20999	4.72121	0.356886
TCGA-DF-A2KN	4.95381	3.30735	2.59861	8.83309	3.14357	6.24503	8.62936	4.39886	8.74041	5.53027	4.19588	1.7922	0.939333	1.45934	3.28975	2.30452	4.28091	6.8795	1.80444	6.80143	2.13066	12.2168	9.56744	10.1893	5.70285	11.3411	4.84025	3.4741	5.21735	3.0218	3.39741	3.57259	1.93747	6.22389	4.73948	3.65443	8.71869	3.96728	2.40012	7.07442	5.29732	4.01576	12.1076	5.50252	6.35744	4.48975	3.72578	6.32625	0.177946
TCGA-DF-A2KR	4.3181	3.25529	4.4157	6.9659	2.18216	2.77878	3.03272	3.95067	4.26086	4.82072	2.97108	3.36451	6.77346	2.73307	2.25918	3.99184	2.21847	5.91692	4.22487	3.07076	3.35625	8.07456	6.78743	9.17128	3.69387	5.67507	4.69535	1.96457	4.00425	3.20146	1.71474	2.39486	2.59677	2.30457	2.04482	2.35862	3.83139	1.84508	3.67284	4.77748	2.81067	5.39268	4.76367	1.36978	6.15099	5.35092	3.31612	8.97196	0.276927
TCGA-DF-A2KS	5.4081	3.05565	2.97128	5.72718	5.40951	5.30147	4.82418	4.45964	2.70498	4.06508	3.27954	5.14944	4.18561	3.16253	0.450234	5.17686	3.9571	12.5717	3.27232	2.26186	2.82542	9.97232	7.91027	11.0688	5.50302	8.5132	5.20616	2.9795	4.06037	2.42055	3.35876	3.58803	1.01777	5.86784	2.35558	1.45981	3.56211	4.50126	1.13286	8.22293	5.26366	5.13187	8.12129	6.12507	4.23077	7.65466	4.61938	4.72732	0.227366
TCGA-DF-A2KU	5.0443	2.56533	4.24579	6.34226	2.20044	3.18953	4.07836	5.25272	4.05136	5.25323	4.39301	1.75351	7.06262	3.59164	4.1194	1.94224	1.90801	3.28778	2.6479	1.79649	2.61088	12.1031	7.31252	11.838	5.35465	7.13225	6.93257	2.4451	3.22747	3.86891	2.56735	2.72257	4.52225	5.5906	3.35739	4.3064	6.0245	3.0683	9.95464	9.35611	3.41179	5.49837	9.86614	5.61354	5.74837	6.33375	3.83545	4.96956	0.184545
TCGA-DF-A2KV	5.1681	3.52728	7.30969	6.01146	2.50909	4.56345	2.53021	2.19014	5.21922	5.60461	5.70677	6.53941	8.02405	2.94263	2.81041	4.5336	4.17259	2.44862	7.21757	3.8191	4.82454	11.1318	7.03874	11.7204	4.64642	4.5646	4.45807	1.99528	2.4441	2.42701	2.10458	1.74992	1.44375	3.64273	1.5209	1.96517	4.44402	2.33492	2.59057	6.31752	2.46951	5.50166	7.09152	2.99442	4.4189	7.18072	2.29212	6.35922	0.193826
TCGA-DF-A2KY	3.02244	3.86958	3.97813	3.56079	2.95773	4.00442	2.38753	2.12034	3.79612	4.22777	1.37326	2.43936	3.77038	2.76759	4.64964	4.30025	3.2429	2.29945	1.19607	4.78477	3.8354	7.17143	6.78126	7.3692	3.62858	7.26849	4.1351	2.03585	5.18435	3.10318	1.86224	3.60696	2.3281	2.74315	2.43794	2.66295	3.92211	2.49745	1.3635	3.57295	3.52715	4.04247	4.60336	2.14242	3.96811	5.15796	3.67515	3.92102	0.26024
TCGA-DF-A2KZ	5.86218	8.35156	5.65037	5.26852	1.20159	9.04249	6.03523	5.12626	2.45002	6.13474	2.9849	5.42277	1.1064	6.50164	4.73105	5.13495	3.07192	4.01237	2.15395	3.50592	2.02124	11.4626	8.73028	10.8543	5.27221	8.03675	4.7361	2.56226	5.11058	2.68072	3.25301	3.10731	1.45132	4.77047	2.99239	1.99133	5.44733	5.34843	2.06356	2.87103	6.27221	1.93863	7.66079	4.30029	4.51705	7.50945	3.35701	3.50558	0.175205
TCGA-DF-A2L0	10.31	4.00316	2.41068	3.68895	2.23722	1.68755	5.58232	4.9455	13.4073	3.44453	1.4972	6.92833	4.5348	4.397	3.68755	6.80274	4.16572	4.69898	2.30217	2.38645	3.97376	9.55434	7.5961	7.95635	4.89022	6.92156	3.97573	2.87397	5.18348	2.82466	2.44293	2.88786	2.01302	4.94807	3.47144	1.58384	5.9575	3.62075	1.69692	5.7071	2.45339	2.10665	5.85526	3.51224	0.937931	8.34162	2.80913	2.22335	0.183461
TCGA-DI-A0WH	1.66537	1.54063	6.75631	2.89386	2.86036	3.12655	9.26087	0.342103	3.87682	4.46838	2.22678	3.78353	2.77104	1.8953	3.52767	4.94567	2.54888	2.17577	1.45087	1.4397	4.82818	8.72562	6.75696	14.6858	4.8347	4.06001	6.17357	2.29801	2.64027	2.94727	1.94935	2.58037	1.94944	4.44034	2.12559	2.29103	3.42097	2.8352	1.51572	3.46192	2.55481	0.866643	3.08259	3.34265	1.49294	4.29615	3.8647	2.23628	0.304167
TCGA-DI-A1BU	3.58717	3.73348	5.11171	3.29641	2.78649	3.7256	6.84385	5.28354	1.71583	7.46343	4.18577	3.30844	0.663633	3.76233	3.07293	3.65758	2.41568	2.79486	2.39971	1.49179	1.96486	8.00151	7.43979	10.1534	4.11471	4.80396	5.9257	2.33536	3.04158	4.06836	1.76876	2.36963	3.83658	3.03057	2.42793	3.65966	2.56519	2.45723	5.78912	3.27204	4.15051	3.31555	4.58034	2.6719	5.65718	1.42054	1.52011	7.503	0.391954
TCGA-DI-A1BY	4.10598	5.56747	6.14448	3.59025	5.20522	14.9545	6.03483	2.57536	4.76292	5.99599	3.90478	2.20301	6.43724	2.53094	2.81057	2.39082	5.27441	1.92251	4.29314	2.18037	2.86554	5.92812	13.5965	5.78588	2.90062	9.3221	4.86827	2.11714	6.91686	5.81509	1.96005	6.14935	5.77126	2.50588	4.30115	4.28988	3.34673	4.04156	3.04633	2.9829	3.93198	2.28593	2.88419	4.60963	2.61323	1.74584	3.46404	5.73721	0.321932
TCGA-DI-A1C3	4.04113	3.27	3.80917	1.29651	3.27525	4.10666	7.85561	3.83793	3.5196	2.64941	2.35816	5.01419	1.8236	1.87902	3.04719	8.29166	5.70438	2.61102	1.29556	2.96191	2.19959	7.74229	6.81587	12.3604	3.18347	3.7422	7.3758	1.74258	2.47774	5.17985	1.68573	2.08946	3.69335	2.13125	1.45058	2.69247	4.19407	3.17634	2.3671	2.10143	2.33812	2.83211	4.01904	3.48888	4.53812	1.97057	5.22131	8.75194	0.33195
TCGA-DI-A1NN	2.60656	1.08211	2.6175	2.24527	3.31491	3.65142	4.99116	1.04901	2.86964	1.53973	4.11504	3.48112	3.34356	2.47475	2.05651	5.99193	3.20355	1.32765	4.08873	1.82982	2.09884	6.8058	4.24292	12.9939	3.22157	2.61718	7.63317	1.79108	1.74244	5.26368	1.42271	1.3436	3.12061	1.25074	1.49651	2.86597	2.02855	1.47133	4.45156	3.15971	2.64372	2.62289	3.25639	1.71847	5.86933	2.49277	1.1731	3.26343	0.355995
TCGA-DI-A1NO	5.03944	2.50169	9.35551	3.57295	1.68584	7.99358	3.39582	5.45762	1.51155	4.35069	4.28713	1.1603	2.63534	5.14975	1.64488	4.50813	3.91026	1.99444	2.45783	3.42729	2.93052	10.9671	10.1251	16.4294	4.11066	5.63127	9.26635	1.83773	3.31222	4.85842	1.99709	4.21459	4.15171	1.65788	4.63228	2.95255	0.96806	3.72153	6.56887	2.20989	5.93245	4.17442	4.79897	4.629	5.77583	4.06313	2.93138	3.74829	0.393206
TCGA-DI-A2QT	1.94448	3.72342	3.29296	7.46191	5.16821	3.06262	6.51232	6.56479	4.87628	4.38665	5.08824	1.04295	3.54866	2.42535	3.97244	4.37311	3.41316	3.13587	1.00222	3.76692	4.19699	9.20198	6.9245	15.2947	4.85554	5.06532	7.59929	2.98597	3.07515	3.54425	2.22765	2.77819	3.05396	3.1176	3.50323	4.15021	5.57608	4.0583	5.66901	4.99907	2.65036	6.55664	4.98785	4.43693	5.96795	3.89729	9.28811	3.27188	0.338167
TCGA-DI-A2QU	6.85902	6.87028	3.87892	3.22164	4.69138	3.93168	6.71496	5.80784	2.64468	6.46549	2.1896	2.0186	2.19517	4.04058	5.36467	3.09702	2.60935	1.25569	3.11844	2.14213	2.37652	15.1703	10.8841	14.2369	6.52888	6.65657	6.23653	3.2641	2.85802	2.6245	4.55624	4.42229	2.88572	5.91798	6.925	4.63368	7.83716	6.53802	5.66077	8.55715	6.73184	6.85131	3.57584	4.87124	4.67471	6.42459	2.64825	2.76353	0.165088
TCGA-DI-A2QY	3.17479	4.10003	4.92366	3.02049	3.36677	4.16788	2.85231	2.47711	3.34092	7.23024	3.021	2.59691	5.81015	2.64929	3.71796	4.07575	1.90918	4.2712	2.82096	14.4947	1.34306	8.07322	3.85464	15.315	3.62	2.73362	9.89525	1.86317	1.60141	4.96682	1.07761	0.972395	2.43872	2.91057	1.23139	4.26464	2.49574	1.33193	5.39078	2.91768	4.55506	2.75705	4.3477	3.66318	4.79074	6.22688	3.95877	3.01326	0.490745
TCGA-E6-A1LX	5.56774	7.45972	5.59733	4.96551	2.54625	7.96504	2.18978	4.31356	4.00848	2.5445	1.82824	3.69683	3.3307	2.41685	1.51836	1.77287	1.3111	2.33051	2.3678	1.43718	3.95338	11.1516	19.5535	10.894	4.82737	8.24817	4.60901	2.56145	3.85362	2.16778	2.47604	4.8559	2.15356	3.95998	5.81973	2.75993	4.85972	7.5547	4.93029	6.64701	3.57318	5.09747	5.05975	5.06548	4.76967	3.80345	3.28531	3.629	0.203795
TCGA-E6-A1LZ	4.62299	5.92088	2.83962	4.04301	2.2541	2.10116	3.08648	1.1568	2.17488	4.60629	4.49183	1.2785	3.8102	2.5531	1.99122	1.72001	1.19661	1.21974	0.780289	2.23619	3.64723	7.49858	16.9966	13.3051	3.30601	8.22637	5.7829	1.46116	3.89418	2.33032	1.4008	9.15072	2.08159	4.3694	6.66983	2.48587	3.64456	4.76434	2.38758	4.45996	5.88739	3.70306	3.04417	4.38723	4.54428	4.96111	4.37606	2.00279	0.243314
TCGA-E6-A2P8	5.55046	4.82472	1.94961	5.073	2.08333	4.3079	4.4796	1.12741	0.860367	3.57974	2.90365	1.57915	5.60696	2.65172	0.277382	3.07925	5.60975	1.09662	3.02062	2.0063	2.95943	10.7492	11.0783	14.0254	5.08265	7.64283	6.64117	2.54923	4.40723	3.05063	3.24871	6.21847	2.0266	3.76835	10.886	2.24639	4.10188	7.32147	1.0413	7.81734	5.86096	1.28416	9.46699	8.86736	1.8445	6.36581	5.99765	4.08877	0.233694
TCGA-E6-A8L9	3.77268	2.78633	2.1204	5.59473	4.59459	3.93415	4.18867	4.95653	2.18544	2.97408	2.46992	5.54987	3.68352	2.40448	3.89927	4.06518	5.42252	3.6414	2.75039	1.65674	4.02117	14.0447	8.20088	14.9172	5.55393	5.48266	6.18533	2.53341	3.40363	3.35232	3.21761	4.93579	2.04817	5.52112	6.56535	2.18512	6.04488	4.58774	3.8989	7.7122	7.00138	4.05349	6.90442	6.60719	7.89746	4.97753	6.44308	4.57626	0.164301
TCGA-EC-A1NJ	2.87326	3.51803	5.67575	5.05112	2.02628	7.75967	10.2479	3.37633	5.21793	3.21422	2.3629	1.68008	4.93903	1.62508	3.81393	5.65924	1.41958	7.52674	6.52105	0.522338	4.05633	3.67454	21.0618	5.21885	1.95143	12.5193	4.59525	1.67852	7.63298	4.23794	1.76206	4.49682	3.90709	1.52233	4.32637	2.82844	1.25795	6.23765	2.93537	1.48069	2.35508	2.39651	2.40087	3.69719	3.0138	1.64901	8.53416	6.46935	0.3544
TCGA-EC-A1QX	1.65355	3.04785	2.81567	4.4078	2.42437	4.70369	1.49662	0.997333	2.47622	3.15283	2.30295	3.73794	2.42961	1.71315	2.67236	2.17635	1.87892	2.37808	1.79404	1.33702	3.42102	7.26108	12.9027	3.38059	2.8246	5.05805	1.50249	1.82083	2.33977	1.2132	1.42018	1.81049	1.23212	1.67324	2.43939	1.79672	2.47266	2.91891	1.74777	2.00829	2.17308	2.86069	2.53651	1.94215	3.07055	2.86072	1.28302	1.78138	0.483992
TCGA-EC-A24G	3.25832	6.23968	2.81686	4.81234	6.60966	6.22876	2.00245	4.9105	2.30033	2.79286	1.6184	4.87601	5.27285	4.09147	6.36493	6.71781	0.870606	3.22671	1.65068	2.19293	1.76013	5.6449	12.0701	6.98651	2.84548	7.39981	3.82434	1.82722	5.53887	3.10389	1.62222	4.57038	2.64808	1.64829	4.22711	2.29899	2.42171	5.07282	2.83045	3.0698	5.48309	1.841	4.54503	3.19555	2.87609	2.12529	3.41193	2.93307	0.279654
TCGA-EO-A1Y5	3.30255	6.62698	4.23632	2.88713	5.2454	3.18848	2.93447	3.19178	2.85799	5.53053	3.50201	3.02038	3.98192	2.05822	3.58354	5.83352	3.09389	4.54963	4.20618	0.913491	0.82302	8.45517	7.55576	17.0808	4.03196	5.68408	8.12763	2.23602	3.65612	4.82772	1.72534	4.10925	2.50378	2.35717	5.19542	3.06091	2.12056	5.81538	5.30725	3.44342	6.76447	2.50873	7.02183	9.64458	3.02918	4.80424	4.55745	3.70171	0.391018
TCGA-EO-A1Y7	6.64227	3.96066	2.2934	6.39858	2.19167	3.47741	3.86632	6.27164	2.83762	2.77489	2.95564	3.01251	7.11879	3.59474	0.9952	2.91896	1.4348	1.57499	2.50468	3.77677	1.07228	8.85459	18.6254	12.4852	4.53374	9.57403	5.84861	2.34136	4.27194	2.83607	3.92639	4.55979	4.75906	3.81048	5.81608	4.48554	5.04302	7.50222	9.77182	5.72562	5.27494	5.46861	7.3539	3.97063	2.42715	3.69512	4.56806	2.37059	0.314619
TCGA-EO-A1Y8	3.17644	5.90533	1.47794	6.38732	4.01104	0.943557	4.74027	2.33554	2.62247	4.69347	1.70127	1.50359	4.0194	2.28082	0.564849	4.76762	0.732104	1.08813	3.11321	2.96471	2.4859	9.51609	14.5383	12.5395	4.23481	8.60677	6.18866	2.08693	4.69951	3.18405	2.3349	6.36155	2.81108	3.9099	5.19426	1.72718	4.47875	5.03361	2.61186	7.16221	5.94436	2.19568	6.47387	4.85914	0.877886	3.20129	4.18874	0.965323	0.291387
TCGA-EO-A22R	3.95084	7.58166	1.07437	5.1031	1.95026	1.08897	5.16357	2.46637	1.26678	5.8396	0.532446	1.78563	8.59935	2.96188	1.21445	1.28489	1.89006	1.0302	3.67053	4.14053	1.41678	9.90827	25.9876	10.5417	4.15161	10.723	4.99111	1.70552	3.98246	1.9018	1.73382	4.34475	2.55305	2.21067	3.90712	6.14608	4.14863	6.47946	8.69845	4.98762	5.32607	4.60957	3.78203	2.06712	6.13806	4.80576	2.3131	2.86882	0.402569
TCGA-EO-A22S	4.62875	4.93478	4.32071	4.9224	0.999619	5.41244	4.22966	3.105	4.35896	4.42195	3.99384	2.26572	7.60047	4.63924	1.4827	1.44219	2.48361	1.62706	3.43382	3.346	0.896191	11.122	16.3484	17.4658	4.66831	9.95205	9.93927	1.78274	5.8447	4.49869	2.68336	6.68057	5.44076	4.37558	7.9886	9.20786	5.95777	6.65856	5.49963	4.53988	3.65301	4.58606	3.87558	2.61402	7.4889	3.31994	3.56912	4.29522	0.440107
TCGA-EO-A22T	4.95554	2.1035	3.05796	2.69964	1.98678	2.13603	4.0693	2.75771	2.01798	1.31364	2.32018	1.19409	4.46084	3.78786	3.66837	5.6192	1.11413	2.53333	6.1393	1.81552	3.98345	11.1401	24.2866	11.7658	4.56319	10.0705	5.78413	1.91398	3.87568	2.3896	2.87058	6.19057	1.51381	3.99465	6.76832	3.02313	4.28307	5.60117	8.1636	4.66563	3.02069	5.88256	8.63648	2.90122	13.0637	2.53305	5.50395	1.63778	0.348821
TCGA-EO-A22U	3.95087	1.80051	2.69166	4.48455	2.30923	6.24054	5.27764	3.16772	2.86986	3.23754	2.77723	3.19161	4.69728	2.45833	1.7575	4.50057	1.37517	2.34473	3.61507	2.06662	1.77685	7.79464	28.2456	7.53756	3.9567	13.183	4.36279	2.40275	6.97925	3.13504	1.85143	4.79466	2.70867	2.06758	2.29908	7.14567	1.56947	2.56406	15.1066	3.1697	1.13111	11.5306	3.70322	3.71663	6.10858	6.56936	3.6307	5.11143	0.331147
TCGA-EO-A22X	2.46875	1.72477	3.35416	7.97864	1.64806	3.50784	4.86443	1.73981	5.96596	3.11335	2.11714	2.60386	3.54111	3.63023	1.49295	2.26528	0.715639	4.49482	5.5588	1.83314	1.40316	8.82403	15.5792	6.59983	4.66057	7.7838	3.53499	2.51602	3.25977	1.66969	3.61215	3.70797	1.82835	2.90153	3.52622	2.48961	3.63477	2.83179	1.24563	1.39991	4.75722	2.84866	0.333286	2.70574	2.96728	2.77198	2.32028	4.72335	0.174747
TCGA-EO-A22Y	1.99302	3.34163	3.0153	1.70787	2.36292	2.26419	1.67718	3.01681	0.365704	1.14224	1.90214	4.55527	2.27132	5.5583	2.956	3.7408	1.57338	4.80142	2.23167	1.63696	3.57304	4.84444	11.1923	11.1856	2.01026	7.2527	6.37462	0.853407	4.47582	4.90338	0.770906	2.90374	3.26527	1.18407	3.64519	2.82583	1.66066	2.38881	6.1056	1.60293	4.26621	3.98951	1.80236	4.5186	5.33287	2.26089	4.17423	1.59053	0.581779
TCGA-EO-A2CG	3.53797	2.70769	3.49858	2.9739	4.11622	3.04805	4.01748	3.53447	6.53766	1.83523	2.84765	5.47685	5.35593	3.91101	5.01622	3.09202	3.29286	6.99372	1.87187	2.65892	2.11316	4.77082	7.80349	7.10907	3.33432	8.6411	3.60797	2.36061	5.70766	2.05506	1.74641	4.66069	1.83481	2.34519	4.1536	1.98727	3.473	3.51142	1.12905	4.07018	5.73909	3.29506	2.5448	4.10952	2.76124	6.20478	5.60316	1.14725	0.360905
TCGA-EO-A2CH	5.18271	3.19379	5.24878	3.73024	1.82269	7.78112	3.03462	1.92409	1.0415	5.75471	2.23839	2.83688	2.76786	1.56856	2.81942	5.37578	0.300768	0.938956	2.44995	1.55889	1.87233	3.55935	4.64756	9.35524	1.96805	4.42915	5.08206	1.47016	3.73991	3.29794	1.448	3.3486	2.87653	2.00005	2.42024	2.76956	2.37115	2.97463	2.28328	2.51911	3.59421	2.95918	2.45939	3.41906	3.5684	7.21474	1.90872	7.32269	0.491085
TCGA-EO-A3AS	3.19717	3.3359	3.45598	3.40255	2.15918	2.2607	4.44152	1.92673	4.8457	2.33055	2.53312	0.445396	3.83369	2.28283	0.611632	4.54515	1.38003	3.20522	2.20692	2.5223	3.76986	5.27652	17.5307	8.94816	2.46322	8.95246	4.54397	1.3604	3.50778	2.11651	0.919262	2.67613	1.7396	1.03955	2.72499	2.27675	2.15071	2.0868	2.68218	1.25936	3.2421	0.670614	1.75492	2.73858	2.82439	1.25553	3.06728	4.48813	0.468614
TCGA-EO-A3AU	0.221635	1.51595	1.24128	0.147816	1.29343	1.37221	0.210458	0.923603	1.88168	0.470484	1.12095	2.19969	0	0.876709	2.39754	0.701412	1.43586	2.24496	0.188407	1.20961	1.86325	32.5944	3.08184	1.38909	0.628007	1.50552	0.669693	0.475381	1.17965	0.392369	0.354058	0.908581	0.431827	0.053758	1.01122	0.55961	0.214757	1.48777	0.911428	0.423738	1.77706	0.90575	0.536417	1.62699	1.07233	0.159735	1.31391	0.969045	0
TCGA-EO-A3AV	5.10122	2.81873	0.547206	4.08104	5.6646	1.03681	3.26215	1.77278	1.77839	3.78582	1.04965	1.06372	1.11023	2.52254	0.52582	2.70901	2.27406	0.747326	2.04442	2.39108	6.55485	8.71509	19.1629	9.84746	5.19388	9.47372	5.51617	3.42254	5.65934	3.10074	2.57115	5.71056	2.64891	6.3681	8.17062	2.68052	8.94809	3.77	4.6942	5.13317	8.17519	2.66326	7.83318	3.08108	3.0829	5.39045	3.23955	0.693677	0.258735
TCGA-EO-A3AY	4.3574	4.01983	9.27184	2.78991	2.60048	5.02877	2.66375	2.37791	6.05973	1.94171	5.46695	3.57861	4.06843	2.81095	4.01232	3.40931	3.54136	3.29724	4.89898	3.02976	0.109073	7.61774	11.8819	13.4309	3.31475	6.6008	7.01457	1.48711	4.11442	3.3713	2.11149	3.24372	1.56377	3.27145	5.10823	2.00672	3.65597	6.50037	3.17484	4.43116	2.65373	5.67683	2.62695	2.99739	2.04458	4.01081	5.93851	4.00334	0.390919
TCGA-EO-A3AZ	2.24307	2.00953	6.47514	3.05065	8.58129	5.63402	1.65931	3.73689	2.45113	9.16146	2.55717	3.76942	4.92464	3.97994	0.686878	0.962101	1.50426	0.858095	2.08901	3.42664	3.49332	6.42307	14.5199	9.34906	3.2929	10.4288	4.81671	1.86858	4.19335	3.13285	1.72746	2.48841	2.66765	1.32372	2.11986	4.10527	2.98001	4.74717	4.03851	2.55747	3.60456	5.99022	3.67504	1.92695	9.43732	4.03972	2.85747	4.92173	0.415918
TCGA-EO-A3B0	3.49573	2.90486	1.55084	2.16843	4.04348	2.34259	7.67038	2.1444	2.38418	6.08806	2.66574	3.06581	6.04968	2.61057	1.01003	3.72821	3.06551	1.79998	4.1492	2.31438	2.62254	9.74506	18.7697	16.4032	4.76039	9.89515	6.72286	2.23436	5.02535	3.13259	2.51299	7.72196	3.98891	3.87952	6.00598	6.8575	5.48754	8.29786	5.15529	4.69736	5.43228	7.39911	7.36645	4.44519	6.11346	6.11001	4.84718	7.4545	0.375764
TCGA-EO-A3B1	3.39279	4.61213	2.69888	6.68163	7.31278	2.42948	5.69985	4.46484	5.99628	6.45977	3.54873	5.87715	2.15781	1.45032	3.06253	2.66825	3.16024	2.57067	1.66526	1.9446	6.05351	8.26258	12.7387	12.4958	4.62977	8.32914	6.04974	2.72342	5.38269	2.73926	3.01109	5.52499	2.62682	4.59594	4.95456	2.08968	4.69242	3.59949	4.19098	6.57619	5.47557	3.34247	4.00809	6.39958	3.94379	5.44875	4.67839	4.37018	0.351019
TCGA-EO-A3KU	3.5715	4.11851	5.14703	1.77316	5.41788	8.96386	3.1914	3.61166	3.69028	5.21502	6.3719	6.72916	4.02062	2.70495	3.13341	3.28871	2.58868	1.23783	3.83054	4.54246	2.03154	9.12905	11.4594	9.89161	3.33488	6.88656	6.53431	1.73214	4.07191	4.98531	1.37469	2.87868	3.11404	2.02959	2.63097	3.93981	2.12477	3.36049	3.14077	1.61668	5.89149	5.37999	2.07426	2.54482	2.89681	3.26582	4.37694	5.39554	0.345677
TCGA-EO-A3KW	3.51158	9.26139	1.08708	3.10123	3.66557	2.5661	5.0229	3.22739	5.38638	3.88302	1.88147	5.51734	2.67366	2.43906	6.58876	4.31576	3.20408	5.5839	2.56698	2.47914	2.57863	7.58008	12.4865	8.91922	3.63829	7.29142	5.10625	2.60458	4.41892	3.4932	2.55217	3.61476	3.64562	2.43669	3.53276	2.29637	2.05198	3.76552	0.844869	2.40254	4.44055	2.72832	4.27779	4.4751	1.25275	1.59059	4.56257	0.481524	0.29883
TCGA-EO-A3KX	4.07686	6.60223	2.76267	3.27877	2.89474	2.63128	7.45685	8.74005	2.12872	2.47474	1.42205	1.52173	1.71396	5.45296	2.11255	2.27345	2.67561	1.89668	5.30679	3.8428	3.41471	8.81847	8.10701	14.3601	3.75018	4.687	8.82737	1.80942	2.86445	5.0184	1.55354	3.61688	3.39008	2.42974	4.26378	4.44316	1.91696	6.82827	7.35422	2.35005	6.01966	6.18569	4.58241	4.54503	3.20147	4.26495	5.51734	6.00208	0.407441
TCGA-EO-A3L0	1.73165	2.25012	3.2798	2.01168	2.93369	7.27703	2.97213	0.68437	6.01819	1.57574	4.25484	5.5476	3.61132	2.23542	3.75992	2.90336	1.99802	5.3436	3.56001	0.995835	2.78619	9.50254	19.5283	9.69749	4.08874	8.95926	4.75064	2.1856	4.81825	2.53655	1.69704	4.46394	2.62597	1.26798	6.93628	6.0068	1.61726	5.76676	5.18727	2.17285	7.74441	4.97778	1.56016	3.23745	7.45291	3.37169	2.81707	1.11863	0.230697
TCGA-EY-A1G7	5.60296	2.80285	1.88187	3.72859	2.91296	6.45952	3.20317	9.28488	5.81105	3.33126	2.0556	7.04679	4.72132	2.66185	4.37696	1.84767	3.93925	4.14719	5.30771	2.25861	4.47305	8.70446	8.17902	6.83267	4.78864	5.31877	4.34878	3.54045	3.89903	3.81374	2.7921	4.0121	2.75737	1.91053	4.92978	2.07673	2.41851	2.8374	3.09755	3.63213	4.1306	4.30672	3.38671	5.19988	5.48671	3.69877	4.57283	1.97441	0.207584
TCGA-EY-A1G8	2.34348	4.50049	4.70139	6.19599	3.40203	3.3734	3.94789	4.16109	0.349621	4.58259	2.08385	2.23642	2.412	1.235	4.31301	2.97997	2.87305	4.53927	4.61311	2.5256	0.79429	9.23615	13.3989	9.41494	4.47234	8.85326	5.31208	2.48148	5.10228	3.76152	2.71864	4.25131	3.13321	3.43261	6.52984	2.68696	4.05364	6.08121	1.40307	4.16311	4.56296	2.51838	5.34764	5.07079	4.41952	3.94166	4.41944	4.35428	0.257945
TCGA-EY-A1GC	7.03987	5.07705	3.85309	6.16235	2.48051	7.17527	4.89224	4.20128	2.64639	0.961418	3.72935	2.81188	4.9	2.28277	5.74048	4.6509	3.07186	1.01685	2.54014	2.26613	3.81216	9.12941	9.40669	9.2254	5.19566	6.12208	5.12694	3.14509	3.20802	2.81204	3.19692	2.29973	2.27597	7.16054	1.49634	6.1264	12.2154	3.52829	4.50484	4.17641	2.68932	4.93303	7.00394	5.34662	1.96823	5.91026	5.60128	5.91615	0.184617
TCGA-EY-A1GD	2.73009	2.23235	5.80654	1.49972	2.14996	3.08727	3.56921	3.24583	1.47914	8.59263	8.13467	3.22614	2.84979	2.18497	2.38739	2.54032	4.83662	3.79563	1.83066	6.30258	1.98651	8.37109	6.4364	12.0384	3.91142	4.03202	6.69939	1.9038	2.64044	4.98831	1.7688	1.9587	3.01998	3.23542	2.49126	1.90134	2.53506	2.22731	1.47562	5.01354	3.28403	3.18093	5.99651	1.60171	5.14474	6.71722	2.17638	6.72713	0.283147
TCGA-EY-A1GE	8.5938	3.16548	6.6363	11.1668	3.54831	3.07346	2.55663	3.77417	3.29907	5.66192	3.15894	1.81105	2.97019	3.32715	4.60686	0.30318	2.30517	2.20366	3.82846	5.57935	2.35385	12.0848	8.74687	12.2376	5.73055	5.38251	6.83892	3.5862	2.70571	3.43004	3.22856	1.42084	2.78301	6.10494	2.56696	1.80353	11.0496	4.34617	3.74691	5.56137	2.81771	3.99439	11.5796	5.48865	6.26292	3.51606	4.70811	6.48359	0.13353
TCGA-EY-A1GF	3.08616	1.01719	1.73184	4.14862	1.95265	3.49903	6.1744	3.44917	3.41511	2.92116	3.69933	6.77648	5.95749	4.54687	3.603	3.77238	3.35719	0.940542	5.71387	1.04858	2.74963	11.1462	7.74714	12.261	5.01092	5.40286	6.76623	2.79033	2.69458	3.92775	3.30006	1.59443	2.98917	2.8751	1.62736	3.54562	6.93526	1.63479	3.65582	6.49339	1.46789	5.66807	11.0725	2.01849	3.12917	5.0035	1.70585	4.83729	0.172949
TCGA-EY-A1GH	5.7915	4.4415	4.42428	6.86749	5.29983	7.74118	3.47881	7.11094	4.00549	3.21692	6.01766	6.11033	0.204115	6.40276	1.49474	1.89379	2.12646	2.02938	0.0767894	2.38754	0.635845	14.9031	9.701	8.42721	7.92563	5.72301	6.46256	5.8035	4.62485	5.74059	5.03839	5.19117	5.11569	5.99798	5.34371	4.80873	9.1206	5.77385	7.22216	6.98613	3.43262	4.5606	13.1111	4.17434	3.10897	6.41293	4.56569	8.69306	0.116234
TCGA-EY-A1GI	6.2726	3.21915	4.90584	5.66088	1.1491	5.48625	6.10047	2.16008	5.31146	8.54717	1.55613	3.24627	5.31168	3.41812	2.74438	4.58653	4.85778	3.13067	5.43005	3.01807	0.71242	7.34988	6.64662	10.1582	3.51702	4.21904	6.55199	2.11736	2.82169	4.95418	2.01425	1.65752	3.16007	2.32532	1.35906	2.4508	2.0737	1.88761	1.70534	2.14401	1.8217	2.5925	6.0826	1.94271	5.19173	6.80598	2.37666	3.81984	0.25814
TCGA-EY-A1GJ	10.1062	2.542	3.43681	7.88346	3.59039	4.14133	5.08665	3.30518	3.51118	4.05006	2.69252	3.17049	5.18956	0.730393	9.62402	5.53568	2.37966	4.3078	2.53954	3.96797	3.95593	9.41301	6.61115	6.82941	5.81892	4.92051	5.12253	3.84133	3.2483	5.06314	2.81347	2.25879	3.80759	1.91113	2.72327	3.33101	4.68471	3.02716	3.73989	6.38973	1.79419	2.72775	4.15301	3.07141	2.13612	4.55346	1.66035	5.40539	0.145806
TCGA-EY-A1GK	4.2686	4.75535	2.7623	5.1037	4.87104	2.74983	3.81173	7.44069	2.586	6.25357	2.82012	0.683661	4.55788	2.73224	3.30577	8.39828	3.59014	3.24472	3.38889	3.87438	0.919092	12.5471	13.5452	11.5869	5.90115	7.80097	6.35608	3.88763	4.51625	3.58629	3.76485	3.2826	3.74499	4.87573	4.86147	3.81007	5.7305	5.02636	4.94087	5.2765	3.77659	9.66215	8.52133	2.35569	6.94564	8.37959	4.28093	6.63515	0.179681
TCGA-EY-A1GL	6.11841	3.63218	3.69252	7.79715	3.13952	2.26365	4.31709	2.01207	5.2819	15.0719	1.55027	2.45681	3.27519	4.14436	6.47289	0.840686	3.55629	1.47417	0.0234107	4.67784	4.31118	13.0285	6.81771	11.6691	6.43879	4.21444	6.24405	4.6934	2.30342	4.02988	4.02406	1.96923	3.1159	4.45721	2.4409	2.93195	5.23593	2.18003	1.50102	6.90135	2.75196	4.16341	9.63071	2.95195	6.07343	6.01146	1.99009	4.34464	0.132757
TCGA-EY-A1GM	6.07248	1.85544	6.16065	1.57868	5.64109	2.87848	5.69897	3.57214	4.35626	7.62924	2.15099	4.20232	3.53202	3.47245	3.11573	5.59706	3.20782	4.31972	1.49156	3.53712	2.49143	7.59809	3.42247	11.1889	3.82119	3.6381	7.66912	1.90388	2.39447	5.41455	1.54968	1.42385	3.543	1.33668	1.10801	3.38746	2.18923	0.942084	6.08162	4.98098	2.34023	6.46544	5.15619	3.177	3.77453	7.15794	3.56604	1.77685	0.331162
TCGA-EY-A1GO	5.03744	2.75281	5.4344	12.962	5.83855	5.26348	4.35449	2.88731	3.21374	4.8922	5.21504	6.89534	0.52157	5.49174	4.06857	5.15624	6.26404	2.46277	1.91812	1.09701	1.15016	11.7276	4.58414	12.1316	5.55112	4.26785	6.36506	3.41564	3.70634	3.63854	2.34395	2.10972	2.62788	5.20562	2.21688	2.36376	4.07311	1.94568	2.44085	9.8188	4.35914	3.14212	5.21964	3.72542	3.23007	3.95834	3.46651	3.97784	0.197631
TCGA-EY-A1GP	5.96014	4.06514	2.59789	4.16379	2.98613	3.91937	6.44411	3.58025	7.01602	2.92752	2.49437	2.36274	3.31778	2.33395	3.27204	2.32264	0.94366	1.77344	2.36296	0.514919	4.36197	8.79503	10.337	16.7157	4.23042	6.8177	7.97477	2.39209	4.1054	4.21636	1.99691	3.84377	2.83698	5.32772	5.9031	2.07569	4.76056	8.8285	1.33982	7.83507	5.69216	1.62717	5.71295	9.21885	5.70606	7.17537	8.16266	2.55319	0.410554
TCGA-EY-A1GQ	6.3098	7.11054	3.08813	3.08008	3.86475	4.99119	8.00022	5.42731	4.29851	1.6978	2.4169	2.28283	7.31412	2.82927	2.2783	3.98335	4.01013	4.22705	4.01233	5.55099	2.64138	8.0276	11.1827	13.0318	4.04861	7.24191	6.53805	2.94516	4.20769	4.45322	2.96688	3.31547	4.04565	2.729	2.64232	3.98674	4.68655	3.58035	3.91104	3.75451	6.07315	9.75845	6.80854	3.23898	12.4433	4.38716	6.11443	5.54727	0.349448
TCGA-EY-A1GR	4.06486	4.45447	4.83463	4.95054	4.13044	5.38008	4.44437	4.75424	2.25184	2.14809	2.52021	1.34489	3.9302	1.04521	7.67652	6.88236	3.30625	3.91384	3.9139	5.04133	2.11117	8.54459	8.23649	11.1855	4.59632	5.96671	6.68811	2.78839	3.3607	4.00133	2.1572	2.37425	2.30343	2.69019	3.87771	2.09847	2.32182	5.48951	5.79179	5.11339	5.42608	6.36686	4.83497	5.45669	4.47314	6.40124	3.97354	5.66551	0.284356
TCGA-EY-A1GS	8.59623	3.13718	6.17102	2.7633	3.0521	3.38267	2.6566	2.93884	1.63618	7.19427	2.26068	7.08054	2.55794	5.81243	4.08118	6.04642	4.95893	2.15028	4.42667	1.94463	1.6171	9.09752	9.34408	12.4044	4.87451	7.57642	6.13847	2.62638	4.21242	2.93123	2.6469	3.54697	2.69743	3.94625	4.37171	4.2682	4.69088	5.92899	4.80538	5.84597	7.62335	5.72548	3.397	4.97005	8.74626	7.69825	4.28296	3.65243	0.311348
TCGA-EY-A1GT	7.47874	6.52805	6.3865	12.6221	2.26381	2.19696	5.68834	3.56737	3.47369	2.33308	3.25149	7.43333	3.22327	1.93336	4.28029	3.10882	2.29352	6.18157	0.434343	2.41932	3.91378	12.9607	10.1366	8.40205	6.58388	6.8806	5.09348	4.42356	5.79762	4.63544	3.63519	6.2245	5.8012	6.75151	8.43244	4.13572	7.26526	5.14749	3.61739	5.91883	6.64863	2.50128	6.87662	5.36719	1.28602	5.60934	6.86796	3.85684	0.15407
TCGA-EY-A1GU	3.60836	6.99031	8.08828	8.32453	3.88821	2.49705	4.6704	2.82887	9.5829	4.39775	5.48929	2.34578	8.72881	2.91966	2.65207	8.34407	2.57804	2.5132	1.89873	3.68002	2.24886	11.5347	9.11801	12.1875	5.85598	5.83452	6.79349	3.22782	3.91374	4.00773	2.50452	3.66683	3.45185	2.69723	7.11053	3.89937	4.65686	7.69302	2.59992	3.47422	3.93996	3.80733	6.22145	6.34962	4.89261	5.25798	5.01511	8.62472	0.219842
TCGA-EY-A1GV	6.43514	2.75687	6.40458	7.87936	4.78163	10.0067	6.60374	2.51472	3.44796	3.00451	2.90947	3.68299	4.30885	2.26195	3.65278	2.20523	1.72518	5.18818	1.76495	1.49686	5.03015	9.08507	16.3213	7.02673	5.81879	11.0228	4.30067	4.87378	8.0765	3.66227	4.63451	5.86179	2.99755	5.82949	5.40657	3.22815	4.75365	5.73242	4.18623	6.53131	4.50753	3.96109	7.92539	6.64082	6.26663	4.00006	7.06243	6.76825	0.212754
TCGA-EY-A1GW	4.82748	2.42982	6.62765	3.0089	2.72018	1.75147	5.76769	3.47307	0.518638	3.37268	3.08655	9.13248	4.39087	2.20733	5.10077	2.75858	5.08716	5.33843	2.77734	3.15201	2.52271	7.08538	11.0859	6.55131	3.65763	8.57703	3.92141	2.10218	3.69599	3.2672	1.78846	2.10505	2.49015	2.3835	2.22519	2.46967	1.79408	2.1755	1.23902	2.92218	2.58241	3.29996	3.08704	1.36217	2.87331	2.17792	1.62394	1.81956	0.317237
TCGA-EY-A1GX	0.515261	4.73885	5.5214	3.07913	3.43146	5.13295	7.05815	2.49329	4.39017	3.85126	3.11745	2.83684	5.01015	1.38365	4.18148	2.18719	2.27104	0.918403	3.66768	1.43611	2.35075	11.7684	12.4739	10.4672	6.05133	9.32754	5.62123	2.98625	5.58746	3.23877	2.99574	5.15516	2.86027	3.75532	6.69839	3.36977	6.60135	6.00475	3.82887	3.28108	3.82179	4.5158	6.82195	3.95437	5.17225	3.62323	3.2529	10.0649	0.234481
TCGA-EY-A1H0	3.21845	7.40015	2.44094	2.00331	1.906	4.58856	1.55008	2.221	3.81214	0.454053	2.47472	1.74085	0.00559735	0.269418	2.75842	0	1.19384	1.077	0	2.37203	2.57008	22.9854	9.7867	15.4302	11.1271	6.81096	8.42508	6.51732	4.42534	4.41026	5.62291	5.12169	4.86822	12.7955	11.0522	6.07106	12.6509	10.2148	7.92081	10.4429	8.23378	7.77157	5.53957	10.6779	6.07595	5.08688	6.62692	7.31746	0.0793659
TCGA-EY-A210	4.50931	5.14934	7.7577	3.82622	4.64142	4.03528	0.723495	2.32629	4.17978	3.95075	3.27691	3.39179	3.8344	1.86163	5.07007	5.41655	1.45605	2.81736	1.75509	1.66465	6.18719	8.77233	9.10846	9.41908	3.9237	6.09573	5.61852	2.00559	3.46323	3.35985	1.66428	3.47802	2.46281	1.46025	3.07092	2.72721	1.83147	4.61888	5.13477	2.35701	4.64933	3.70303	3.21594	4.67915	5.17592	4.9637	5.80463	8.11313	0.347859
TCGA-EY-A212	2.9852	6.09463	5.76641	3.52776	5.45646	3.96436	2.51086	3.00489	2.7089	3.88679	3.09095	3.28036	2.62211	3.6592	0.568862	1.36842	3.4035	1.93546	2.56356	1.49313	4.69577	6.77735	7.25192	10.5548	3.57183	4.74494	6.60833	2.11636	3.29348	4.92867	1.93771	3.50273	3.46579	1.52445	2.43791	3.37278	1.76444	3.36155	3.76247	2.04526	2.68752	2.09524	1.8053	1.5156	3.78144	1.82864	4.11932	7.53365	0.33025
TCGA-EY-A214	5.74818	4.82802	3.51668	2.37684	2.35397	7.34283	3.65955	2.27623	1.96757	5.2387	1.82961	1.11945	3.44558	3.0667	3.39047	3.90177	1.93636	6.08367	4.07693	4.17642	3.48182	8.61914	13.836	10.5755	4.9129	9.78656	5.91377	2.70194	3.91473	3.60151	2.34653	3.72064	2.37557	4.04305	4.44138	6.99067	5.1798	3.96696	7.93036	5.17887	5.3009	3.95686	3.60762	5.65368	6.06215	4.55945	5.96639	7.07276	0.274137
TCGA-EY-A215	3.74383	4.86704	8.89974	5.78164	2.88993	3.35688	2.97756	2.85007	4.60135	5.33601	3.01302	4.15088	3.86149	1.72069	2.77035	2.90206	2.79374	1.72581	1.30555	3.87898	2.08697	8.30049	11.2997	13.5228	4.95367	6.94127	6.5098	2.87832	3.96236	4.33459	3.5548	3.42619	2.98445	3.30553	6.05944	4.17203	5.62499	6.80002	5.00727	7.38798	5.34407	4.69631	2.9994	8.27807	6.69234	5.24863	5.00672	5.40314	0.305323
TCGA-EY-A2OM	5.26551	5.46051	10.6757	2.61104	4.99628	3.49154	4.67791	4.57536	7.96063	3.48314	3.922	5.88121	0.931715	1.6084	3.57338	10.1512	4.5722	4.93084	4.10935	4.78213	3.21792	8.86957	13.5498	8.72219	4.28672	9.20187	4.91422	2.33733	4.64923	2.98679	1.69238	3.45648	1.87144	2.24915	3.34582	1.90663	3.78512	5.39205	2.15866	2.95154	5.89265	3.69566	2.90722	4.68178	5.50572	4.1801	4.47289	2.57758	0.234788
TCGA-EY-A2ON	4.64702	2.02308	3.53406	6.11127	1.97853	5.11973	3.04084	1.63748	7.64043	4.39001	2.54728	2.70846	3.10746	2.70698	9.19036	5.57785	3.47314	5.95758	6.37137	1.07122	3.07206	8.35	12.8826	5.94406	6.46172	13.2779	3.70974	4.96435	9.39666	3.82146	4.3972	7.10815	3.72756	3.69124	6.34024	2.81576	4.08542	6.13548	3.06369	4.36591	4.09146	2.04479	3.60469	8.08495	4.9301	3.75673	5.02046	5.56684	0.163681
TCGA-EY-A2OO	6.46083	2.81001	4.61732	3.548	1.52117	2.29736	5.14133	2.28755	2.74369	3.16141	2.96953	5.08515	3.91379	3.6453	2.59955	6.28194	2.6574	4.96685	4.35909	4.99953	1.14026	8.94717	22.8554	8.67035	4.03886	12.3292	5.75512	2.02308	6.40543	3.63935	1.40354	4.58818	6.09996	1.38669	4.45137	6.88044	2.69979	4.16477	5.70165	5.01143	3.7797	3.76549	2.69687	2.14344	3.58394	3.92705	1.41644	4.20765	0.355099
TCGA-EY-A2OP	5.56032	6.72837	3.57366	2.89418	3.32052	5.15211	7.27138	5.881	4.85574	5.90921	3.45364	1.34203	4.81001	1.83011	3.10257	2.76116	3.96144	1.94322	1.01917	1.486	1.75138	11.7077	7.76247	8.87859	5.82676	4.07305	4.60759	4.03437	2.38064	2.41716	3.63778	1.57029	2.21913	3.78301	2.71953	1.15442	7.75401	3.54243	2.10352	3.70406	2.37446	1.71051	5.39292	4.33439	4.88312	3.23181	2.3443	2.04485	0.125355
TCGA-EY-A2OQ	4.00845	5.01183	5.28232	2.34984	5.4948	4.49525	8.51387	4.88324	3.62474	3.81963	1.50884	7.89339	4.21849	2.888	3.66089	1.15333	1.72778	2.31952	6.65419	2.2008	2.59696	9.05936	9.08881	7.25979	4.26728	5.46599	4.18404	3.32122	4.92448	3.77825	3.08648	5.52639	3.31973	3.67113	6.36165	1.78943	3.29415	4.84141	2.93721	3.20228	6.36045	2.29029	3.77317	4.26623	3.17366	3.06589	3.54902	3.84328	0.210037
TCGA-EY-A3L3	3.97587	8.15511	3.38216	6.8752	3.39696	3.81566	7.25054	1.43181	8.04695	4.2753	4.17135	3.87153	3.20553	4.16781	1.74833	5.46622	2.19653	1.48583	1.63834	6.4445	5.3567	11.0097	10.119	15.3784	5.39227	5.75368	6.52533	2.64118	2.78143	3.16829	2.73059	4.4442	2.43864	3.28196	8.25794	2.34241	3.69517	2.2183	3.70697	6.10691	6.50735	6.87424	6.52302	4.05543	2.4794	5.14536	5.15658	4.92063	0.282145
TCGA-EY-A3QX	2.15816	4.67198	2.55563	3.91522	1.18558	7.58654	3.61542	3.65019	2.35522	2.97286	3.87416	3.06611	5.40092	1.68782	2.20213	2.95286	1.49636	3.8809	3.01188	3.74177	9.5799	8.32097	11.2322	11.7783	3.98157	6.95128	6.01174	2.34981	4.86688	3.6324	2.00164	6.11893	2.72086	2.86849	4.78568	2.00881	2.48613	4.23783	1.68865	4.81348	3.86536	3.64609	2.54575	5.16385	4.30959	3.32341	3.40493	3.76786	0.284227
TCGA-EY-A4KR	4.81898	3.1497	6.81737	0.695651	1.91271	3.7636	2.9249	3.02472	4.22881	3.59096	1.96333	2.48462	4.94017	1.51145	2.37897	4.03342	2.73464	2.69348	4.33506	1.49983	2.12125	8.97174	14.0332	9.49433	5.27866	10.026	5.62288	2.87928	5.24325	3.10701	3.0251	4.53995	2.37239	3.51031	7.46434	5.40561	7.52664	7.40668	4.48571	3.67687	4.07693	5.94911	3.32408	5.16483	4.2381	6.68399	3.80162	4.3754	0.253146
TCGA-EY-A547	3.3107	3.29892	4.09036	2.72611	2.73852	6.44971	5.54675	4.4311	3.11121	7.91022	2.48578	2.09293	3.66486	3.06587	4.07318	3.71673	0.767841	3.13052	2.87259	3.62149	1.77728	9.88809	9.83087	10.3281	4.43758	5.46377	5.3215	2.50199	3.30597	3.81439	2.28258	3.0853	3.04416	1.77492	2.61889	2.37406	3.2058	4.12009	3.16734	3.79244	2.89379	9.05863	4.78389	2.9108	8.19254	4.72387	3.8197	8.52585	0.2778
TCGA-EY-A548	1.73227	1.56863	1.93764	1.66092	2.68875	7.44051	3.34227	1.1545	4.26545	2.32783	2.34534	5.85123	1.59725	3.42005	4.40665	2.85192	2.30306	4.63687	4.71702	2.75407	2.76796	6.27825	7.84268	8.6752	2.88305	5.15924	4.87761	1.32557	3.32677	3.74247	1.25256	1.81492	3.20374	1.22604	1.87847	2.83891	1.50022	1.04886	1.872	2.0708	0.898968	3.2256	2.17891	1.06814	1.73926	1.18524	3.32512	4.20945	0.332749
TCGA-EY-A549	6.51191	4.64361	5.62559	5.78237	4.58503	3.26058	3.83888	5.42488	3.39332	3.97019	4.32125	1.55592	5.42334	5.05022	6.97792	1.10981	1.16351	5.08669	2.19901	2.39115	4.46665	8.49071	13.2266	13.3287	4.50587	5.74716	5.56976	2.74179	2.91065	2.78088	2.48384	2.43051	1.56574	2.66286	1.88134	1.11487	3.18516	4.16142	0.855726	4.80034	1.72659	2.37458	3.54066	2.81596	3.111	5.34958	3.73517	4.12331	0.328971
TCGA-EY-A54A	3.78487	4.8794	6.29044	6.33564	4.39509	4.14032	4.72348	3.04476	1.43598	2.68884	4.28629	1.56215	2.9502	9.45378	3.52397	4.41998	3.02932	3.39017	6.52384	5.32127	1.47748	9.74361	6.82695	14.7663	4.08472	3.77124	6.56666	1.83744	1.87201	3.55232	1.26258	1.66509	4.03598	1.52331	1.616	5.3935	1.99325	1.62141	3.90178	6.30698	1.68292	4.59086	4.83541	1.7929	6.65968	4.19898	2.54888	4.22658	0.308286
TCGA-EY-A5W2	8.39003	2.62531	2.16233	5.67615	4.43424	2.87102	5.26277	2.23693	4.00351	10.2785	3.2931	2.39698	0.879475	4.39445	4.64161	1.76006	2.86092	2.37561	2.30911	4.42094	2.6831	11.824	7.41661	14.5006	4.80189	4.01091	6.64131	2.5811	1.87422	3.83341	3.18886	1.45605	3.24083	5.06153	1.24182	5.13805	2.86488	1.66272	4.70384	6.9915	2.85269	5.2753	5.65519	3.59558	4.99629	3.37629	3.13074	5.35043	0.176482
TCGA-EY-A72D	5.49019	1.85166	2.18074	5.39845	1.53778	4.21773	6.16544	3.26324	5.35061	5.68253	5.36798	2.01311	4.45842	4.97374	4.47486	3.78912	3.13883	7.82456	3.52976	0.397533	2.5638	10.0615	7.5364	10.3988	4.13292	4.66874	5.53283	1.98304	2.97068	3.44243	1.63846	1.85711	3.28054	1.9186	0.863012	2.92649	3.33304	1.56238	4.63032	2.92636	1.55773	3.18359	5.07469	1.86598	8.89506	5.25232	1.63861	4.03453	0.251974
TCGA-FI-A2CX	1.42453	3.4126	4.28603	3.11854	2.06267	2.79665	1.0384	4.14276	1.09852	4.67745	3.23008	2.56727	2.8799	1.1298	0.3437	2.27531	3.80858	3.08418	1.39496	1.48703	1.00527	7.49715	19.6682	11.0882	2.81968	9.50021	6.22243	1.4942	4.96716	2.58568	1.03575	4.0849	4.31986	1.30412	5.33403	2.69845	1.67716	3.752	2.02104	1.27663	2.90206	3.17903	1.40334	5.57358	6.13788	1.92709	4.78268	3.46406	0.497475
TCGA-FI-A2CY	1.92433	2.94387	4.93694	2.16367	4.11199	2.45106	1.70795	2.88343	1.69308	2.42285	2.81972	3.41436	1.54088	0.628593	3.60804	1.64195	4.61265	1.64738	1.93342	2.472	1.93283	3.31304	5.77252	17.1738	1.45567	3.6203	9.40074	0.772569	2.39438	4.06559	0.596656	1.78719	2.97037	0.757237	1.55511	5.17676	0.656585	3.38121	4.97284	0.90886	3.63722	8.73753	1.35267	3.94892	5.22645	0.855261	4.3129	3.83315	0.744507
TCGA-FI-A2D0	3.82067	1.96012	5.90595	1.65872	4.18421	4.33079	4.73268	4.85493	3.85699	3.75578	1.69013	4.14986	2.41135	4.5821	1.31186	3.55595	4.67529	3.68767	1.7943	4.19011	2.46607	6.0351	6.14913	14.785	2.70834	3.81543	7.6827	1.50995	2.28985	3.55861	1.57572	2.16531	4.1681	1.40119	2.90941	5.67845	2.95219	2.64506	3.49139	2.58759	2.23597	3.78455	1.10564	2.77169	2.16167	1.61096	3.25679	2.51499	0.414186
TCGA-FI-A2D2	4.87697	6.37515	4.01698	4.9479	3.57454	8.64676	5.64295	1.41114	7.14298	4.77209	1.76821	5.49465	2.62366	3.60119	5.75303	5.42756	1.89929	2.72813	4.96564	1.32063	2.9488	8.77211	16.4115	6.20825	4.31951	9.84023	2.99908	2.84688	6.1546	2.06294	3.0237	5.56299	1.66108	3.74489	4.57898	1.33461	2.69909	6.5923	2.40322	6.64605	5.88289	4.11126	4.73299	4.19136	3.16397	2.75003	3.14336	5.60031	0.166226
TCGA-FI-A2D4	3.4918	0.586717	4.72147	3.0487	7.40854	6.4418	3.86861	2.2402	4.48727	2.49971	2.94163	2.78057	3.02616	4.52099	4.66115	4.5191	3.76313	2.71064	3.63502	3.63273	2.35206	6.11803	8.64933	14.4005	3.77328	4.03452	4.96603	1.97999	1.86173	2.78462	1.41538	0.795847	2.44935	1.60767	0.977244	2.20948	2.1296	1.65684	3.21348	2.43626	1.51614	5.48622	2.44838	1.43934	4.9945	3.31065	2.41997	3.96166	0.547458
TCGA-FI-A2D5	2.39695	4.7116	4.16702	2.00745	2.76766	6.45022	2.17106	3.02586	3.22997	2.49632	3.33947	3.19471	4.29808	2.38352	2.80388	3.58674	2.08244	4.23777	2.8287	2.31974	3.59105	8.11049	16.9549	8.0792	3.58947	10.675	4.20163	1.59118	3.48607	2.51098	1.44814	2.01817	2.24434	2.05409	2.32976	4.531	2.66703	2.83322	5.43252	1.49961	1.56983	6.81317	1.72406	2.41234	5.1091	1.765	4.3941	3.13431	0.433069
TCGA-FI-A2D6	3.52736	4.96671	7.61613	5.93835	2.88099	1.48745	2.54942	3.26795	3.34254	2.16215	2.53095	2.02867	5.44764	2.11206	2.12232	2.32107	2.7594	2.4025	5.31815	1.35861	1.32104	9.08899	11.4926	21.9172	4.10924	6.95509	7.30132	1.64537	5.50454	2.94554	2.30918	8.8151	4.09388	3.3969	8.36988	4.7041	4.89032	10.6761	4.07941	9.84367	3.24759	4.74131	5.18398	6.51759	6.7024	3.10751	3.65485	5.87487	0.463537
TCGA-FI-A2EU	1.58815	2.46868	1.58767	1.85555	4.53924	2.2263	3.20502	1.61556	4.11461	1.94366	2.21946	4.12371	1.69804	1.73521	2.40544	2.23476	1.04075	3.15299	2.58222	6.1347	2.75603	3.37655	11.7265	6.25893	1.97951	9.48091	4.13484	1.32204	5.92641	2.35127	1.20325	5.57429	1.73436	1.70187	7.86551	0.613659	1.43444	4.75851	0.870496	1.14944	4.30565	1.2515	2.30921	4.08868	1.13969	2.1112	2.49233	1.49507	0.455888
TCGA-FI-A2EW	2.25428	0.811318	1.21798	3.58997	3.0315	0.358606	5.23391	1.35819	2.39826	3.82123	2.72176	5.50055	4.28204	1.47358	3.22851	1.25031	1.92946	6.48893	2.85895	1.48831	1.45243	4.26976	24.6765	6.77878	2.50553	11.9901	3.7614	1.61399	5.59013	1.95797	1.67624	4.67341	1.27157	1.23978	4.30364	0.965981	1.93891	5.17904	0.749961	3.67435	3.27439	0.418434	1.73125	5.61132	1.57569	2.9193	2.5328	6.46286	0.421248
TCGA-FI-A2EX	1.92091	1.81292	1.91426	2.75751	0.516381	4.61147	2.07881	1.70846	3.74406	1.75913	1.07399	0.93994	1.6758	1.66899	3.08801	6.29928	2.43879	1.28029	2.21073	0.441744	2.67216	4.73458	15.0435	12.4936	1.9804	7.41525	6.19048	1.15454	3.64057	3.98573	0.904213	4.45754	4.52121	1.13967	5.28381	4.41949	2.38303	3.13837	5.11731	2.46506	1.45459	3.78223	1.70737	3.10148	3.4098	3.00452	1.88059	4.94581	0.548158
TCGA-FI-A2EY	1.67934	4.5787	4.93977	2.82379	2.47087	2.30453	2.3077	3.92354	2.07861	3.60722	5.01459	1.07401	0.738484	3.80202	2.40274	1.41197	2.37405	2.82569	5.43931	0.871558	2.58767	3.26104	17.7717	8.10509	1.65951	9.50481	4.8513	1.25121	5.41742	4.24053	1.11807	4.49195	2.59229	1.23064	5.38311	3.37494	1.43116	4.14506	4.13121	1.34044	3.04868	3.44925	0.821398	2.34398	3.64107	2.34735	3.49411	2.13947	0.557001
TCGA-FI-A2F4	5.09019	1.05468	3.109	4.01973	2.31874	2.58335	3.65226	2.52361	1.61793	5.41524	0.951869	3.59014	1.58162	3.4924	3.81269	2.4163	3.93874	1.168	5.37848	3.97999	4.31909	9.12232	17.6862	11.2504	3.33015	7.06468	4.89103	1.56873	2.65033	2.88726	1.97375	3.02344	2.9653	2.1004	1.95443	2.34574	2.5455	1.19062	2.58508	3.12138	2.81954	4.85511	2.58089	0.598747	4.25419	5.26211	3.51329	2.47341	0.256741
TCGA-FI-A2F8	4.37602	1.95507	3.42204	3.70187	1.6009	3.41419	3.07691	2.64597	3.11467	4.23612	5.40228	3.15137	1.50646	1.32818	3.8451	2.66294	1.10846	0.799027	3.84298	1.97778	0.613277	10.2811	17.2678	14.0273	3.84347	8.63763	5.79621	2.131	4.36736	2.83008	1.99253	5.49593	2.4483	3.36115	5.06519	2.31402	2.01093	3.05744	2.83468	5.59305	3.07788	4.05902	4.76589	4.42343	3.10761	3.06118	3.56069	3.10157	0.238188
TCGA-FI-A2F9	1.19545	3.11991	2.12687	4.36249	2.13042	1.23826	2.25137	4.95122	5.29764	3.42463	3.28734	1.92572	3.87824	2.58871	4.05507	3.57157	3.3767	8.27758	0.47509	2.2114	1.78595	6.60747	10.7433	15.7339	3.18009	6.18038	7.23201	1.82368	3.80911	3.42813	2.01451	5.41491	2.93124	2.8841	3.70325	5.76666	2.70529	4.52691	4.3108	2.68674	3.19181	3.72726	2.45974	5.53781	4.44699	3.14557	3.42181	1.37847	0.46462
TCGA-FI-A3PV	0.99641	2.32236	3.5234	2.99653	3.73602	3.8852	2.43555	2.63998	2.13893	3.40886	1.53872	2.05753	0.380677	3.79603	2.31935	4.14697	2.29427	1.78841	5.51562	4.59027	1.78528	3.56964	5.31526	12.2901	1.67938	3.92794	8.75023	1.17961	3.28967	6.93648	0.865759	3.17877	5.89783	0.973247	2.47251	3.65371	1.89957	3.97262	8.63819	2.05839	3.46112	5.55858	1.38888	3.72697	2.86679	1.39712	3.93846	4.92496	0.539445
TCGA-FI-A3PX	3.2238	5.22957	6.40028	1.50072	3.8632	5.14993	3.13426	2.12486	3.12971	3.77036	1.76466	5.87308	3.4678	4.15207	2.9225	1.66733	2.27064	3.94182	0.280206	8.51878	3.30112	6.20708	8.69551	7.63267	2.99797	6.07647	5.06739	1.59748	4.06426	3.80529	1.30757	2.34728	3.46679	1.9244	2.38972	2.24271	1.77288	2.5217	2.82759	2.26557	3.47553	3.39128	3.12572	3.69965	3.30164	2.38535	9.72509	4.62027	0.289738
TCGA-H5-A2HR	2.87689	4.12315	5.40152	6.62634	5.46124	4.71849	1.21434	6.53779	5.95852	5.13627	3.731	1.51846	3.22688	1.91757	1.49664	1.95986	1.07127	0.523206	1.4737	7.40978	0.548392	4.94734	4.49225	19.6831	2.89135	2.95825	13.2541	1.5294	1.87838	7.80578	1.31116	2.03861	4.51162	1.9994	2.90103	4.16375	2.004	4.0493	4.5526	2.56063	5.40096	5.23156	3.59223	3.76611	3.5671	3.28707	7.30052	2.24472	0.49868
TCGA-JU-AAVI	5.21907	4.95235	4.27502	5.84998	3.80502	5.95152	5.917	3.20717	4.06893	5.87857	2.64439	1.47361	3.7415	5.11839	3.59601	1.25423	2.34704	2.3993	1.8242	1.98036	1.12029	14.3048	15.152	16.977	6.23487	8.17358	7.92087	3.08403	4.22746	3.14483	2.65748	6.22759	2.96405	5.92525	4.87781	3.97756	4.11637	6.20681	2.87376	6.48793	4.81259	4.48681	4.6145	4.89766	5.16106	6.51168	7.08822	3.04869	0.170504
TCGA-K6-A3WQ	6.21464	5.59818	5.76811	3.6565	2.02581	1.85992	6.94465	7.41244	4.97681	2.00044	5.66192	1.2971	3.93684	3.54641	3.31138	2.41619	1.85361	5.30941	1.55679	3.42978	1.65558	7.14777	7.57726	12.8673	3.62158	4.29675	5.8658	1.9511	2.24852	3.3371	1.8882	1.33842	2.4865	1.89296	2.40142	4.25346	1.85133	2.63983	3.00158	3.10238	3.4106	3.00336	5.54291	2.53601	7.94382	3.44133	2.82983	7.46051	0.424108
TCGA-KJ-A3U4	4.47812	3.1899	5.45381	5.01083	6.1477	3.43467	2.81254	8.17386	3.9179	4.58865	3.95913	3.2071	3.7704	1.5606	1.52237	2.46193	2.02605	1.32921	3.09333	2.75035	1.90706	11.7084	11.7182	13.4711	5.63092	7.31673	7.30458	3.23396	5.03501	3.44809	4.37266	4.88491	4.4432	5.45191	7.00687	6.31536	6.04376	5.44839	3.10889	5.95412	5.22448	7.11013	5.43764	4.10643	4.05061	6.24108	8.03474	6.1892	0.204803
TCGA-PG-A5BC	5.61437	3.4004	4.15738	4.62062	4.79975	3.60201	4.15808	4.74863	3.40207	4.70473	3.45888	3.88802	3.85748	2.87444	2.54711	2.80559	2.35038	2.4036	4.09027	2.48712	2.18346	10.3009	12.8291	13.3742	5.18835	7.46508	7.0977	3.03319	4.1657	4.02552	3.48917	3.76181	3.47505	5.03453	5.01815	4.06275	5.96216	7.27948	5.5263	6.69874	7.28959	4.77955	6.42451	5.80019	5.04095	6.93318	4.64481	3.94784	0.251549
TCGA-PG-A6IB	3.48901	2.66291	4.43073	3.86409	1.60464	4.29848	3.27438	1.64113	4.20013	2.18886	1.5339	4.35212	2.61014	1.82351	3.08832	2.3166	1.55941	2.74979	2.53189	1.64668	1.67991	25.2461	21.6947	9.58532	7.0667	7.51861	4.73638	3.98134	2.91074	2.67626	3.68355	2.58373	2.56049	3.97303	3.6155	3.02909	5.12154	3.01849	4.00517	3.77473	2.45388	5.66816	3.6902	2.17525	5.66963	3.87661	1.65206	4.08316	0.153333
TCGA-PG-A7D5	1.83264	1.76486	6.53075	3.29067	1.25798	3.80039	2.933	1.80195	1.99137	6.28856	2.39512	2.34426	1.07413	6.08509	1.4878	4.44902	1.58441	2.8857	1.95022	5.20115	3.49281	9.94831	11.7534	10.4408	4.65755	6.87013	6.45488	2.47314	3.19273	4.23161	1.6637	2.07677	3.48791	2.80476	2.24536	3.94809	5.50078	1.022	3.29552	3.1368	1.21449	3.26336	2.72863	1.55952	2.50705	4.2067	2.40412	6.57276	0.179005
TCGA-PG-A914	6.02339	5.95698	2.1446	5.50598	3.8108	3.90532	4.19767	3.84184	3.49884	3.78163	4.2082	3.58098	3.35763	2.41581	3.91228	3.06131	2.99744	3.51178	3.01147	2.69758	3.4207	12.1114	16.0378	7.611	5.96602	6.91322	4.43077	3.56516	3.84776	2.42218	3.94411	3.11874	1.89101	5.59792	4.15785	1.9841	5.3669	4.52222	2.83708	5.85538	3.78504	2.74785	5.46831	4.33842	5.06496	7.12466	3.71457	2.62372	0.12864
TCGA-PG-A916	4.54061	3.14958	3.16324	4.23533	3.12916	3.43742	5.85719	2.71003	3.06666	4.28993	3.76009	2.64754	4.20449	1.94951	2.75643	3.89441	2.51987	3.08452	2.64028	2.87496	2.99609	8.3775	20.0548	9.14202	3.7974	9.32784	4.61562	2.18208	4.58039	2.65379	2.37426	4.25703	1.93277	3.28051	3.8765	2.68061	4.51384	4.7651	2.88049	5.03525	4.04965	3.53353	3.99041	4.22126	3.613	4.68219	4.90853	3.56461	0.278841
TCGA-PG-A917	5.10002	2.8386	4.25991	2.51669	2.62874	3.44821	4.67218	4.72463	2.98298	2.78618	2.18406	4.05028	4.17668	1.5361	2.44552	2.01613	2.46119	4.89479	2.05325	1.8397	3.18583	11.1791	11.8111	10.946	5.1005	5.79369	5.92403	2.99459	2.79635	3.61684	2.80133	2.47909	2.88646	4.33383	3.69343	2.20653	4.58425	3.6579	3.34629	3.65237	4.34129	3.93809	4.73567	3.34267	4.36874	4.75429	2.99945	5.10769	0.165683
TCGA-QF-A5YS	6.00398	7.58399	2.86098	2.0093	4.73261	2.74091	3.84488	6.2874	2.11401	5.68722	2.78424	3.85761	2.26769	1.32006	1.41047	3.0258	3.4547	1.59094	2.74927	1.8472	2.82266	14.5223	6.80558	13.9072	5.97093	4.46998	7.78019	3.02657	2.56846	5.20675	4.72385	2.01595	3.43079	5.09824	4.5002	2.67219	6.42571	3.21492	3.20249	10.2836	4.72837	4.67621	7.06538	5.59662	11.5029	7.28666	3.15029	6.52938	0.157678
TCGA-QF-A5YT	9.14528	6.79018	3.56898	5.64618	6.32412	4.80571	1.95109	4.05237	2.5697	2.07276	2.15288	2.94309	7.01587	4.2538	2.89187	4.35896	6.29971	4.20431	4.61376	3.7313	3.78419	7.70354	7.5059	14.4564	4.28007	4.63166	6.92995	2.73013	3.24473	4.69356	2.56289	2.5472	4.17134	3.69873	5.66333	4.59349	7.97544	4.89138	6.1873	5.90113	5.81175	4.7414	4.4554	4.51007	5.1027	3.22261	3.73255	4.66738	0.334319
TCGA-QS-A5YQ	6.98752	7.29159	3.33129	4.73542	10.0043	3.43664	3.0727	3.04886	6.42601	3.21008	3.14299	3.51166	3.60953	3.3586	5.31117	4.33919	1.79853	4.00015	3.59213	2.25796	3.76353	11.0797	7.98399	12.0671	6.06201	5.65873	7.04885	3.38268	4.28327	5.57413	3.77208	3.56204	3.63348	7.45343	4.3324	3.48391	5.95007	4.84831	2.84869	4.90115	9.69337	2.4796	7.22077	6.80253	4.54907	6.34197	4.26881	4.96809	0.216608
TCGA-QS-A5YR	11.1803	4.98392	3.81079	4.47483	5.03551	4.61613	4.90716	5.32264	1.6259	3.68902	7.74799	1.07001	1.25627	5.45989	2.88128	1.45399	5.63767	1.965	0	3.60021	2.17114	13.8965	5.03055	21.7671	6.07165	3.32299	8.9278	3.11848	1.5583	4.28918	5.89159	1.22616	4.00578	9.89405	3.00677	7.55887	7.02482	3.97417	8.15276	9.89441	4.6084	4.9327	12.0006	6.79374	6.21224	2.14425	8.25015	3.90915	0.263825
TCGA-QS-A744	4.12765	5.55265	4.1769	3.68654	8.09251	4.26974	3.57611	4.57692	3.40574	4.95484	3.89705	3.3317	4.40222	4.26771	1.41691	4.76298	3.68965	1.44548	2.99213	5.18259	2.45806	9.25622	4.91679	17.1262	4.36416	2.90436	8.56283	2.40712	1.82042	5.31318	1.97282	1.20377	2.82045	3.03767	2.94495	5.3749	6.86075	2.68065	4.74314	5.53208	5.41538	3.96231	4.09976	4.53691	3.55925	6.505	4.21843	6.63485	0.303877
TCGA-QS-A8F1	7.02834	5.49895	5.54755	3.3087	4.47104	3.75783	2.5313	4.65992	3.44325	3.55372	2.57288	3.57028	1.24596	1.43986	3.22209	2.76868	2.3749	4.03902	0.596262	2.93566	2.03384	13.326	16.1301	10.4853	6.90723	7.90531	5.8619	4.51011	3.94485	4.33077	6.51292	3.10655	6.00418	4.92309	3.385	4.82046	11.8263	4.11205	2.33973	7.49757	6.11801	1.85934	7.52955	5.97802	4.83186	10.6394	6.85772	2.59037	0.135939
TCGA-SJ-A6ZI	4.26666	3.49925	3.63034	2.65471	1.85575	0.960863	5.02342	5.85438	3.79151	2.74968	4.25035	2.56266	1.46597	2.0528	3.95333	2.8868	2.40859	1.81568	4.17591	2.29293	4.08593	13.1382	14.8249	8.31554	5.73636	7.80491	4.22775	3.36741	5.57224	3.26855	3.75154	4.52896	2.69137	5.61883	5.36184	2.96974	7.0922	5.66004	3.47812	7.19394	5.97832	4.41498	6.6933	3.50785	3.59524	2.44065	5.34744	4.76272	0.130887
TCGA-SJ-A6ZJ	3.75647	2.37173	3.2569	4.2687	1.85467	4.39367	4.60537	7.30344	5.21804	2.2587	2.04631	3.39924	4.98965	3.82169	3.86461	2.29326	4.29018	1.85614	3.514	2.32459	2.83534	9.3902	9.75061	9.34406	3.80049	4.81803	4.87939	2.00044	2.72793	2.71894	1.44207	1.77483	2.26053	1.32979	1.80935	2.78782	1.69902	1.10723	3.43169	2.3395	2.24644	2.76085	4.06124	2.40508	1.59433	3.24865	3.5765	4.36903	0.178206
TCGA-SL-A6J9	2.5861	3.33006	4.16779	4.58508	6.01901	4.76055	3.44918	6.59147	2.63836	6.26295	0.671677	3.79328	6.56573	2.85039	3.10459	2.6988	2.04905	2.3938	7.80116	3.90549	0.591484	8.71815	10.6579	17.2955	3.58225	5.34259	6.76308	1.67703	2.60366	4.41976	2.24076	1.93061	4.12094	2.40753	2.8624	7.88941	2.52187	4.11341	6.70917	4.24517	4.20405	4.09034	3.44188	4.41258	8.22145	2.4189	4.90694	2.35548	0.480263
TCGA-SL-A6JA	5.57166	3.52685	3.72484	5.15455	2.75714	2.11164	5.30514	6.01139	8.53974	3.63309	2.28837	4.14291	1.01371	3.93558	3.38382	3.71288	3.70522	0.926527	4.83103	2.58427	1.43757	5.30499	7.25435	15.1719	2.74483	4.14117	6.81749	1.96903	2.56784	3.88239	1.86278	1.92421	3.85942	3.34288	2.57485	3.21016	3.22533	4.09248	3.21407	5.64204	4.17887	5.61605	4.26607	3.57831	3.80065	4.96137	4.53097	7.38886	0.40125
[truncated: 2,629 more columns]

## Sheet: S2
Supplementary Table 2. Glycosylation-associated histopathological features selected for model construction.
Feature	Correlation	P_Value
Total_Granularity_11_Eosin	0.128726	0.0415789
Total_Granularity_6_OrigGray	-0.128157	0.0425541
Total_Granularity_9_Hematoxylin	-0.168969	0.00735808
Total_Texture_SumVariance_OrigGray_3_01_256	-0.195621	0.00187813
Total_Texture_SumVariance_OrigGray_3_02_256	-0.199296	0.00153409
Total_Texture_SumVariance_OrigGray_3_03_256	-0.192936	0.00217264
Object_StDev_IdentifyPrimryObjects_Intensity_LowerQuartileIntensity_Hematoxylin	-0.163623	0.00947319
Object_StDev_IdentifyPrimryObjects_Intensity_MassDisplacement_Hematoxylin	-0.172036	0.00634522
Object_StDev_IdentifyPrimryObjects_Intensity_MeanIntensityEdge_Hematoxylin	-0.146892	0.0199733
Object_StDev_IdentifyPrimryObjects_Intensity_MeanIntensity_Hematoxylin	-0.141295	0.0252538
Object_StDev_IdentifyPrimryObjects_Intensity_MinIntensityEdge_Hematoxylin	-0.145378	0.0212974
Object_StDev_IdentifyPrimryObjects_Intensity_MinIntensity_Hematoxylin	-0.144555	0.0220489
resnet55	0.134126	0.0337402
resnet119	-0.145283	0.0213828
resnet316	0.142	0.0245285
resnet426	0.148593	0.0185711
resnet443	-0.129367	0.040625
resnet457	-0.152895	0.0154023
resnet478	0.18953	0.0026068
resnet519	-0.160077	0.0111586
resnet535	0.158104	0.0122064
resnet568	-0.139102	0.0276295
resnet638	-0.170293	0.00690446
resnet652	0.255671	4.40372e-05
resnet745	-0.196571	0.00178299
resnet782	0.138819	0.0279497
resnet828	0.170362	0.0068815
resnet876	-0.128635	0.0417831
resnet901	0.215237	0.000612457
resnet996	-0.163438	0.00955526
resnet998	0.12707	0.0443513
resnet1030	0.147352	0.0195855
resnet1101	0.139999	0.0266356
resnet1134	0.134574	0.0330791
resnet1146	0.190775	0.00243968
resnet1165	-0.140007	0.0266274
resnet1171	0.13965	0.0270187
resnet1194	-0.132426	0.0360758
resnet1299	0.150621	0.0170127
resnet1460	0.132202	0.0363945
resnet1577	0.208141	0.00092922
resnet1594	0.130457	0.0389518
resnet1785	-0.156951	0.0128587
resnet1861	0.138052	0.0288336
resnet1913	0.16276	0.00986102
resnet1958	0.135805	0.0315614
resnet1996	0.146308	0.0204749
resnet2012	0.139728	0.0269325

## Sheet: S3
Supplementary Table 3. Identification of MGAT4A-regulated genes using virtual knockout and correlation analysis.
gene	Z	p.adj	Spearman_R	Spearman_P	Inferred_Direction
PRF1	4.75451	0	0.1081	0.000132342	Co-expressed (Potential Down)
TP53BP2	4.43197	8.75139e-220	0.001	0.971397	Co-expressed (Potential Down)
LUZP1	4.31	1.24878e-151	0.0366	0.196285	Co-expressed (Potential Down)
ATP1B3	3.4194	4.01922e-08	0.0776	0.0061566	Co-expressed (Potential Down)
FKBP11	3.37582	6.12572e-07	0.1004	0.000387033	Co-expressed (Potential Down)

## Sheet: S4
Supplementary Table 4. Gene Set Enrichment Analysis (GSEA) of pathways associated with MGAT4A perturbation signatures.
ID	Description	setSize	enrichmentScore	NES	pvalue	p.adjust	qvalue	rank	leading_edge	core_enrichment
hsa05320	Autoimmune thyroid disease	14	0.790709	1.94849	2.08498e-05	0.00437656	0.00396158	559	tags=79%, list=12%, signal=69%	PRF1/CTLA4/HLA-A/HLA-F/GZMB/HLA-C/HLA-DRA/HLA-E/CD28/HLA-DRB1/HLA-DPB1
hsa05330	Allograft rejection	13	0.780316	1.89957	3.40588e-05	0.00437656	0.00396158	559	tags=77%, list=12%, signal=68%	PRF1/HLA-A/HLA-F/GZMB/HLA-C/HLA-DRA/HLA-E/CD28/HLA-DRB1/HLA-DPB1
hsa05171	Coronavirus disease - COVID-19	118	0.469789	1.42177	9.98336e-05	0.00641431	0.00580611	1243	tags=42%, list=27%, signal=32%	STAT1/RPS9/RPL7A/RPL15/RPS4X/RPS16/RPL5/RPL3/RPL27A/RPS7/RPL18/RPS2/RPL14/RPS3/RPS26/RPL9/RPL18A/RPL10/RPS5/RPL13/IL6ST/RPL19/RPSA/RPL23A/MX1/RPL4/RPS6/RPL10A/NFKBIA/RPL11/RPL12/RPL8/RPL34/RPS20/STAT2/RPL41/RPS28/RSL24D1/RPLP0/IFNAR1/RPL29/RPS19/PRKCA/RPS27L/RPS3A/RELA/RPL36A/RPL39/PIK3R1/RPS18
hsa03010	Ribosome	148	0.457317	1.39918	9.19372e-05	0.00641431	0.00580611	1379	tags=46%, list=30%, signal=33%	RPS9/RPL7A/RPL15/RACK1/RPS4X/RPS16/RPL5/RPL3/DAP3/RPL27A/RPS7/MRPL39/RPL18/RPS2/RPL14/RPS3/RPS26/RPL9/RPL18A/RPL10/RPS5/RPL13/MRPL43/RPL19/RPSA/RPL23A/RPL4/MRPS34/RPS6/MRPL21/RPL10A/MRPL15/MRPL52/MRPS30/MRPL22/RPL11/RPL12/RPL8/RPL34/RPS20/MRPS18B/MRPL19/MRPL16/MRPL34/RPL41/RPS28/RSL24D1/RPLP0/RPL29/RPS19/MRPL23/MRPL41/RPS27L/RPS3A/MRPS2/RPL36A/RPL39/MRPS18A/RPS18/MRPS26/MRPL40/RPL22L1/RPL6/MRPS9/…
hsa05416	Viral myocarditis	25	0.65263	1.7311	0.000158208	0.00813188	0.00736082	600	tags=52%, list=13%, signal=45%	PRF1/HLA-A/CD55/HLA-F/HLA-C/HLA-DRA/ACTG1/CASP8/HLA-E/CD28/HLA-DRB1/HLA-DPB1/SNTA1
hsa04940	Type I diabetes mellitus	14	0.74146	1.82713	0.000246379	0.00904562	0.00818793	559	tags=71%, list=12%, signal=63%	PRF1/HLA-A/HLA-F/GZMB/HLA-C/HLA-DRA/HLA-E/CD28/HLA-DRB1/HLA-DPB1
hsa04514	Cell adhesion molecule (CAM) interaction	31	0.610959	1.66307	0.000214686	0.00904562	0.00818793	694	tags=52%, list=15%, signal=44%	CTLA4/HLA-A/PDCD1/HLA-F/HLA-C/PTPRC/HLA-DRA/CD99/HLA-E/CD28/HLA-DRB1/JAML/HLA-DPB1/ITGAV/ICAM3/ITGA4
hsa05332	Graft-versus-host disease	15	0.720748	1.78804	0.000302381	0.009714	0.00879293	559	tags=67%, list=12%, signal=59%	PRF1/HLA-A/HLA-F/GZMB/HLA-C/HLA-DRA/HLA-E/CD28/HLA-DRB1/HLA-DPB1

## Sheet: S5
Supplementary Table 5. Spearman correlation analysis between MGAT4A expression and key pathway-associated genes in CD8+ Trm cells.
gene	Category	Spearman_R	Spearman_P	Spearman_FDR	Inferred_Relation
PRF1	Immune Response & Antigen Presentation	0.1081	0.000132342	0.00655094	Positive
PTPRC	Immune Response & Antigen Presentation	0.0908	0.00133437	0.0355932	Positive
HLA-E	Immune Response & Antigen Presentation	0.0862	0.00234468	0.0355932	Positive
HLA-A	Immune Response & Antigen Presentation	0.085	0.00269535	0.0355932	Positive
GZMB	Immune Response & Antigen Presentation	0.0849	0.00270702	0.0355932	Positive
PDCD1	Immune Response & Antigen Presentation	0.0848	0.00275306	0.0355932	Positive
ITGA4	Immune Response & Antigen Presentation	0.0803	0.00457912	0.0402011	Positive
PIK3R1	Immune Response & Antigen Presentation	0.0727	0.0103277	0.0733903	Positive
CD55	Immune Response & Antigen Presentation	0.0719	0.0111197	0.0733903	Positive
NFKBIA	Immune Response & Antigen Presentation	0.0616	0.029753	0.163642	Positive
CTLA4	Immune Response & Antigen Presentation	0.055	0.052506	0.236277	Positive
HLA-F	Immune Response & Antigen Presentation	0.0475	0.0940139	0.344718	Positive
CD99	Immune Response & Antigen Presentation	-0.0405	0.153329	0.451746	Negative
HLA-DPB1	Immune Response & Antigen Presentation	0.0395	0.163389	0.451746	Positive
STAT2	Immune Response & Antigen Presentation	-0.0389	0.169705	0.451746	Negative
CD28	Immune Response & Antigen Presentation	0.0386	0.173398	0.451746	Positive
JAML	Immune Response & Antigen Presentation	0.0373	0.187987	0.471242	Positive
STAT1	Immune Response & Antigen Presentation	0.0306	0.280371	0.585676	Positive
IL6ST	Immune Response & Antigen Presentation	0.0286	0.313133	0.596157	Positive
ACTG1	Immune Response & Antigen Presentation	0.0224	0.429212	0.653722	Positive
PRKCA	Immune Response & Antigen Presentation	-0.0215	0.448782	0.673173	Negative
CASP8	Immune Response & Antigen Presentation	0.0202	0.476827	0.704565	Positive
HLA-C	Immune Response & Antigen Presentation	0.0184	0.515978	0.73363	Positive
ITGAV	Immune Response & Antigen Presentation	0.0177	0.533756	0.73363	Positive
RELA	Immune Response & Antigen Presentation	-0.0173	0.540959	0.73363	Negative
MX1	Immune Response & Antigen Presentation	0.0158	0.577937	0.741291	Positive
HLA-DRB1	Immune Response & Antigen Presentation	0.0155	0.585524	0.741291	Positive
HLA-DRA	Immune Response & Antigen Presentation	0.0081	0.775935	0.853528	Positive
ICAM3	Immune Response & Antigen Presentation	-0.0072	0.79873	0.864627	Negative
IFNAR1	Immune Response & Antigen Presentation	-0.0071	0.803492	0.864627	Negative
SNTA1	Immune Response & Antigen Presentation	0.0047	0.868745	0.905324	Positive
RPS26	Protein Synthesis (Ribosome)	-0.1106	9.25057e-05	0.00655094	Negative
RPL34	Protein Synthesis (Ribosome)	-0.0842	0.00295136	0.0355932	Negative
RPS2	Protein Synthesis (Ribosome)	0.0827	0.00348835	0.0355932	Positive
MRPS30	Protein Synthesis (Ribosome)	-0.0825	0.00359527	0.0355932	Negative
RPL7A	Protein Synthesis (Ribosome)	0.0797	0.00487286	0.0402011	Positive
MRPL34	Protein Synthesis (Ribosome)	-0.0722	0.010793	0.0733903	Negative
RPL41	Protein Synthesis (Ribosome)	-0.064	0.0238597	0.14682	Negative
RPL10A	Protein Synthesis (Ribosome)	0.0634	0.0252115	0.14682	Positive
RPS16	Protein Synthesis (Ribosome)	0.0593	0.0364611	0.18958	Positive
RPS4X	Protein Synthesis (Ribosome)	0.0587	0.0382989	0.18958	Positive
MRPL40	Protein Synthesis (Ribosome)	-0.0565	0.0462651	0.218107	Negative
RPL9	Protein Synthesis (Ribosome)	0.0539	0.0572778	0.246544	Positive
MRPL39	Protein Synthesis (Ribosome)	-0.0512	0.0711102	0.290209	Negative
RACK1	Protein Synthesis (Ribosome)	0.0508	0.0732852	0.290209	Positive
RPS7	Protein Synthesis (Ribosome)	0.0503	0.076223	0.290234	Positive
MRPL41	Protein Synthesis (Ribosome)	-0.0462	0.103102	0.364538	Negative
RPS18	Protein Synthesis (Ribosome)	-0.0446	0.115379	0.393881	Negative
RPL5	Protein Synthesis (Ribosome)	0.0441	0.119683	0.394955	Positive
RPL11	Protein Synthesis (Ribosome)	0.0419	0.139809	0.446487	Positive
RPS5	Protein Synthesis (Ribosome)	-0.0405	0.152898	0.451746	Negative
RPL10	Protein Synthesis (Ribosome)	0.0401	0.157297	0.451746	Positive
RPS27L	Protein Synthesis (Ribosome)	-0.0391	0.168345	0.451746	Negative
RPL39	Protein Synthesis (Ribosome)	-0.0371	0.190401	0.471242	Negative
RPL27A	Protein Synthesis (Ribosome)	0.0364	0.199542	0.480603	Positive
RPL23A	Protein Synthesis (Ribosome)	-0.036	0.204587	0.480603	Negative
RPL18	Protein Synthesis (Ribosome)	0.0353	0.213061	0.480603	Positive
RPL15	Protein Synthesis (Ribosome)	0.0352	0.214268	0.480603	Positive
RPL29	Protein Synthesis (Ribosome)	0.0349	0.218456	0.480603	Positive
RPL24	Protein Synthesis (Ribosome)	0.0316	0.26495	0.570219	Positive
RPL18A	Protein Synthesis (Ribosome)	-0.0304	0.283964	0.585676	Negative
RPL19	Protein Synthesis (Ribosome)	0.0297	0.295389	0.588313	Positive
MRPL52	Protein Synthesis (Ribosome)	0.0296	0.297128	0.588313	Positive
MRPL43	Protein Synthesis (Ribosome)	-0.029	0.306997	0.595935	Negative
DAP3	Protein Synthesis (Ribosome)	0.0282	0.32079	0.597217	Positive
RPS28	Protein Synthesis (Ribosome)	-0.0279	0.325755	0.597217	Negative
MRPL19	Protein Synthesis (Ribosome)	0.0274	0.333836	0.600905	Positive
RPLP0	Protein Synthesis (Ribosome)	-0.0267	0.346107	0.611868	Negative
MRPL22	Protein Synthesis (Ribosome)	-0.0262	0.356133	0.612152	Negative
RPL3	Protein Synthesis (Ribosome)	0.026	0.358635	0.612152	Positive
MRPS18A	Protein Synthesis (Ribosome)	0.025	0.378969	0.632894	Positive
MRPS2	Protein Synthesis (Ribosome)	0.0247	0.383572	0.632894	Positive
RPL13	Protein Synthesis (Ribosome)	0.0237	0.403199	0.642268	Positive
MRPL16	Protein Synthesis (Ribosome)	-0.0234	0.40856	0.642268	Negative
RPS19	Protein Synthesis (Ribosome)	-0.0234	0.408716	0.642268	Negative
RPL36A	Protein Synthesis (Ribosome)	-0.0227	0.424547	0.653722	Negative
RPL12	Protein Synthesis (Ribosome)	0.0198	0.485075	0.706213	Positive
RPL8	Protein Synthesis (Ribosome)	0.0177	0.531819	0.73363	Positive
RPL6	Protein Synthesis (Ribosome)	-0.0176	0.533925	0.73363	Negative
RPL4	Protein Synthesis (Ribosome)	0.0169	0.551679	0.738058	Positive
MRPL21	Protein Synthesis (Ribosome)	-0.0164	0.564254	0.741291	Negative
RPL14	Protein Synthesis (Ribosome)	0.0159	0.575599	0.741291	Positive
MRPS34	Protein Synthesis (Ribosome)	-0.0152	0.591535	0.741291	Negative
MRPL23	Protein Synthesis (Ribosome)	-0.0142	0.615945	0.756877	Negative
RPL22L1	Protein Synthesis (Ribosome)	-0.0141	0.619263	0.756877	Negative
RPSA	Protein Synthesis (Ribosome)	-0.0129	0.649953	0.784699	Negative
RPS3	Protein Synthesis (Ribosome)	0.0125	0.659662	0.786825	Positive
RPS6	Protein Synthesis (Ribosome)	0.0108	0.702615	0.821388	Positive
MRPL2	Protein Synthesis (Ribosome)	0.0107	0.705233	0.821388	Positive
MRPS18B	Protein Synthesis (Ribosome)	-0.0099	0.726678	0.836525	Negative
MRPS9	Protein Synthesis (Ribosome)	-0.0091	0.748195	0.848631	Negative
RPS3A	Protein Synthesis (Ribosome)	0.0089	0.754339	0.848631	Positive
MRPL15	Protein Synthesis (Ribosome)	-0.0083	0.770727	0.853528	Negative
MRPS26	Protein Synthesis (Ribosome)	0.006	0.83179	0.885454	Positive
RPS9	Protein Synthesis (Ribosome)	0.0052	0.854417	0.899865	Positive
MRPS31	Protein Synthesis (Ribosome)	0.0034	0.90448	0.932745	Positive
MRPL27	Protein Synthesis (Ribosome)	-0.0029	0.919849	0.938815	Negative
RSL24D1	Protein Synthesis (Ribosome)	-0.0012	0.967191	0.97706	Negative
RPS20	Protein Synthesis (Ribosome)	-0.0007	0.981249	0.981249	Negative
