# Supplementary material
Source: Research Square preprint supplement (doi:10.21203/rs.3.rs-9428731/v1)
Supplement: Supplementary file 1 [file 6793963dcf22e542cc32e90d.docx]

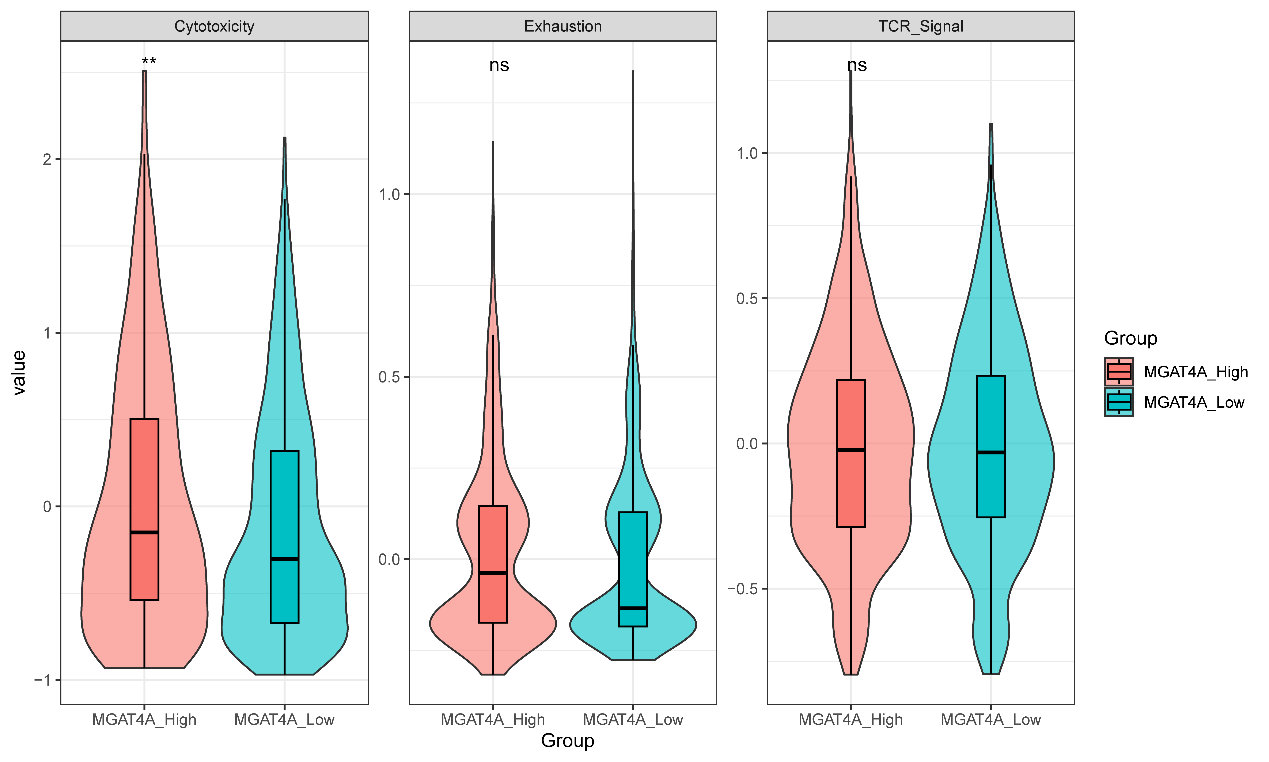


**Supplementary Figure S1. Module scoring of cytotoxicity, exhaustion, and TCR signaling in MGAT4A-stratified CD8⁺ tissue-resident memory T cells.**
CD8⁺ Trm cells were stratified by MGAT4A expression (MGAT4A_High: MGAT4A>0; MGAT4A_Low: MGAT4A=0). Module scores were calculated using Seurat *AddModuleScore* for cytotoxicity (GZMA, GZMB, PRF1, GNLY, NKG7), exhaustion (PDCD1, HAVCR2, LAG3, TIGIT, TOX, CTLA4), and TCR signaling (CD3D, CD3E, CD247, LCK, ZAP70, LAT). Violin plots with embedded boxplots show score distributions across groups. Two-sided Wilcoxon rank-sum tests were used for comparisons; **P<0.01; ns, not significant.
